# Supplementary material for: Health effects associated with exposure to intimate partner violence against women and childhood sexual abuse: a Burden of Proof study
Source: PubMed Central journal article supplement (PMC10719101; doi:10.1038/s41591-023-02629-5), 2023-12-11
Supplement: 41591_2023_2629_MOESM1_ESM.pdf [file 41591_2023_2629_MOESM1_ESM.pdf]

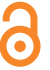

---

# Health effects associated with exposure to intimate partner violence against women and childhood sexual abuse: a Burden of Proof study

---

In the format provided by the authors and unedited

## Contents

|                                                                                                                                                    |                                     |
|----------------------------------------------------------------------------------------------------------------------------------------------------|-------------------------------------|
| Section 1: Data inputs .....                                                                                                                       | 4                                   |
| Section 1.1: Data inputs for intimate partner violence studies .....                                                                               | 4                                   |
| Section 1.2: Data selection and sensitivity analyses for intimate partner violence .....                                                           | 9                                   |
| Intimate partner violence and major depressive disorder .....                                                                                      | 9                                   |
| Intimate partner violence and maternal abortion and miscarriage .....                                                                              | 10                                  |
| Intimate partner violence and HIV/AIDS .....                                                                                                       | 10                                  |
| Intimate partner violence and anxiety disorders.....                                                                                               | 11                                  |
| Intimate partner violence and self-harm .....                                                                                                      | 11                                  |
| Section 1.3: Descriptive results for additional health-related outcomes considered in association with exposure to intimate partner violence. .... | 12                                  |
| Maternal health outcomes .....                                                                                                                     | 12                                  |
| Heavy episodic drinking and alcohol use disorder.....                                                                                              | 13                                  |
| Section 1.4: Data inputs for childhood sexual abuse studies .....                                                                                  | 14                                  |
| Table S8: Summary characteristic of studies analyzed for childhood sexual abuse and 15 identified health outcomes. ....                            | 14                                  |
| Section 1.5: Data selection and sensitivity analyses for childhood sexual abuse.....                                                               | 35                                  |
| Childhood sexual abuse and alcohol use disorders .....                                                                                             | 35                                  |
| Childhood sexual abuse and self-harm .....                                                                                                         | 36                                  |
| Childhood sexual abuse and major depressive disorder .....                                                                                         | 37                                  |
| Childhood sexual abuse and anxiety disorders.....                                                                                                  | 38                                  |
| Childhood sexual abuse and drug use disorders .....                                                                                                | 39                                  |
| Section 1.6: Supplementary results for childhood sexual abuse selected outcomes.....                                                               | 40                                  |
| Type 2 diabetes mellitus .....                                                                                                                     | 40                                  |
| HIV/AIDS.....                                                                                                                                      | 41                                  |
| Maternal abortion and miscarriage .....                                                                                                            | 41                                  |
| Sexually transmitted infections excluding HIV.....                                                                                                 | <b>Error! Bookmark not defined.</b> |
| Conduct disorder.....                                                                                                                              | 41                                  |
| Bulimia nervosa.....                                                                                                                               | 41                                  |
| Schizophrenia.....                                                                                                                                 | 41                                  |
| Section 1.7: Descriptive results for additional health-related outcomes studied in association with childhood sexual abuse exposure.....           | 42                                  |
| High body mass index .....                                                                                                                         | 42                                  |

|                                                                                                                               |    |
|-------------------------------------------------------------------------------------------------------------------------------|----|
| Smoking.....                                                                                                                  | 42 |
| High systolic blood pressure .....                                                                                            | 43 |
| Section 2: Data input details for each risk-outcome pair .....                                                                | 43 |
| Table S15. Summary results of included intimate partner violence studies. ....                                                | 44 |
| Table S16. Summary results of included childhood sexual abuse studies.....                                                    | 48 |
| Section 3: PRISMA and GATHER.....                                                                                             | 64 |
| Section 3.1: PRISMA.....                                                                                                      | 64 |
| Table S17. PRISMA 2020 abstract checklist .....                                                                               | 64 |
| Table S18. PRISMA 2020 checklist .....                                                                                        | 64 |
| Section 7.2: GATHER .....                                                                                                     | 68 |
| Table S19: GATHER Checklist .....                                                                                             | 68 |
| Section 4: Data source identification and assessment .....                                                                    | 70 |
| Section 4.1: Literature searches.....                                                                                         | 70 |
| PubMed Search String.....                                                                                                     | 70 |
| Embase Search String.....                                                                                                     | 71 |
| Cumulative Index to Nursing and Allied Health Literature (CINAHL) Search String .....                                         | 72 |
| PsycINFO Search String .....                                                                                                  | 73 |
| Global Index Medicus Search String .....                                                                                      | 75 |
| Cochrane Search String.....                                                                                                   | 76 |
| Web of Science Core Collection Search String.....                                                                             | 77 |
| Section 4.2: Inclusion and Exclusion Criteria .....                                                                           | 77 |
| Inclusion Criteria .....                                                                                                      | 78 |
| Exclusion criteria .....                                                                                                      | 78 |
| Section 4.3: Systematic review and meta-analysis citation searching .....                                                     | 79 |
| Section 4.4: Data Extraction.....                                                                                             | 79 |
| Table S20: Data Extraction Template.....                                                                                      | 79 |
| Section 4.5: Exposure and Outcome Definitions .....                                                                           | 84 |
| Table S21: Definitions of included risk factors.....                                                                          | 84 |
| Table S22: Definitions of included outcomes. ....                                                                             | 84 |
| Section 4.5.1: Additional description of accepted definitions and measurement tools for depressive and anxiety disorders..... | 86 |
| Section 4.5.2: Additional description of accepted definitions for substance use disorders .....                               | 87 |
| Section 5: Supplementary Methods .....                                                                                        | 88 |

|                                                                                                    |     |
|----------------------------------------------------------------------------------------------------|-----|
| Section 5.1: Definitions of bias covariates.....                                                   | 88  |
| Table S26. Bias covariates for control for confounding used in intimate partner violence analyses. | 90  |
| Section 5.2: Data adjustment for non-mutually exclusive observations from a single study .....     | 93  |
| Section 6: Study Quality and Bias Assessment .....                                                 | 94  |
| Table S29: Study bias characteristics for intimate partner violence. ....                          | 94  |
| Table S30a: Study bias Characteristics for childhood sexual abuse.....                             | 98  |
| Table S30b: Study bias Characteristics for childhood sexual abuse (continued).....                 | 106 |
| Section 7: Calculating the ROS and measure of excess risk.....                                     | 115 |

## Section 1: Data inputs

### Section 1.1: Data inputs for intimate partner violence studies

**Table S1: Summary characteristics of studies analyzed for intimate partner violence and five identified health outcomes.**

| Study           | Location Name                           | Study Design         | Years     | Age Range | Mean Age (SD) | Total Sample Size | Follow-Up Years | Exposure Recall Type       | Exposure Assessment Instrument      | Violence Type                 | Outcome                                 | Outcome Assessment Method                                | Outcome Assessment Instrument                                                                                                                                 | Outcome Definition                                                     |
|-----------------|-----------------------------------------|----------------------|-----------|-----------|---------------|-------------------|-----------------|----------------------------|-------------------------------------|-------------------------------|-----------------------------------------|----------------------------------------------------------|---------------------------------------------------------------------------------------------------------------------------------------------------------------|------------------------------------------------------------------------|
| Abdollahi 2015  | Iran (Islamic Republic Of) (Mazandaran) | Prospective Cohort   | 2010      | 18-45     | N/A           | 1,461             | 0.5             | During Pregnancy           | WHO Domestic Violence Questionnaire | Physical                      | Maternal Abortion and Miscarriage       | administrative and medical records or disease registries | Hospital or Health Clinic Administrative Records                                                                                                              | Pregnancy loss determined via administrative records                   |
| Ackard 2007     | United States of America (Minnesota)    | Retrospective Cohort | 1999-2004 | N/A       | 20.4(0.8)     | 822               | 5               | Prior to The Past One Year | Study-Specific Questionnaire        | Physical and/or Sexual        | Suicide and Self-Harm                   | self-report                                              | Study-Specific Questionnaire (Project EAT survey – ‘have you ever tried to kill yourself?)                                                                    | Lifetime Experience of Suicide Attempt                                 |
| Ahmadabadi 2020 | Australia                               | Prospective Cohort   | 1981-2014 | 30-30     | N/A           | 891               | 30              | Lifetime                   | Composite Abuse Scale (CAS)         | Physical and/or Sexual        | Anxiety Disorders; Depressive Disorders | self-report                                              | Composite International Diagnostic Interview (CIDI)                                                                                                           | Lifetime Anxiety or Depressive Disorders Determined by DSM-IV Criteria |
| Ali 2009        | Pakistan (Sindh)                        | Case-Control         | 2007-2007 | 15-48     | N/A           | 304               | N/A             | Lifetime                   | Study specific questionnaire        | Physical and/or Psychological | Depressive Disorders                    | self-report; physician diagnosis                         | Diagnosed with depression by psychiatrist or family physician according to DSM-IV criteria <i>and</i> currently having score of 8 or higher on Self Reporting | Lifetime Diagnosis of Major Depressive Disorder                        |

**Table S1: Summary characteristics of studies analyzed for intimate partner violence and five identified health outcomes.**

| Study          | Location Name          | Study Design                                         | Years     | Age Range | Mean Age (SD) | Total Sample Size | Follow-Up Years | Exposure Recall Type | Exposure Assessment Instrument           | Violence Type                               | Outcome                                                        | Outcome Assessment Method            | Outcome Assessment Instrument                                                           | Outcome Definition                                                                                       |
|----------------|------------------------|------------------------------------------------------|-----------|-----------|---------------|-------------------|-----------------|----------------------|------------------------------------------|---------------------------------------------|----------------------------------------------------------------|--------------------------------------|-----------------------------------------------------------------------------------------|----------------------------------------------------------------------------------------------------------|
| Bourassa 2007  | Canada                 | Case-Control                                         | 2001-2003 | N/A       | 25.3          | 1,003             | N/A             | Past Year            | Abuse Assessment Screen                  | Physical and/or Sexual                      | Maternal Abortion and Miscarriage                              | administrative or disease registries | Hospital or Health Clinic Administrative Records                                        | Elective abortion                                                                                        |
| Brown 2020     | Australia              | Prospective Cohort                                   | 2003-2015 | 28-60     | N/A           | 1,507             | 10              | Past Year            | Composite Abuse Scale (CAS)              | Physical and/or Sexual and/or Psychological | Anxiety Disorders; Depressive Disorders                        | self-report                          | Beck Anxiety Inventory (BAI); Center for Epidemiologic Studies Depression Scale (CES-D) | Anxiety Disorders Determined by BAI Score >=16; Major Depressive Disorder Determined by CES-D Score >=20 |
| Catak 2016     | Turkey                 | Case-Control                                         | 2011-2011 | 15-49     | N/A           | 752               | N/A             | Unknown              | Study-Specific Questionnaire             | Physical                                    | Maternal Abortion and Miscarriage                              | physician diagnosis                  | Hospital or Health Clinic Administrative Records                                        | Spontaneous Abortion                                                                                     |
| Chowdhary 2008 | India (Goa)            | Prospective Cohort                                   | 2001-2004 | 18-50     | N/A           | 1,537             | 1               | Lifetime             | Study-Specific Questionnaire             | Physical and/or Sexual                      | Suicide and Self-Harm; Depressive Disorders; Anxiety Disorders | self-report; biomarker               | Clinical Interview Schedule-Revised (CIS-R)                                             | Lifetime Experience of Suicide Attempt; Current Depression Determined by CIS-R Criteria                  |
| Delong 2019    | South Africa           | Longitudinal Data from A Randomized Controlled Trial | 2011-2017 | 13-20     | N/A           | 2,366             | 3               | Lifetime             | WHO Violence Against Women Questionnaire | Physical and/or Sexual                      | Human Immunodeficiency Virus (HIV)                             | biomarker                            | HIV serostatus confirmed by blood / biomarker test                                      | HIV Positive Serostatus                                                                                  |
| Deyessa 2018   | Ethiopia (Addis Ababa) | Case-Control                                         | 2014-2014 | 15-49     | N/A           | 510               | N/A             | Lifetime             | Study-Specific Questionnaire             | Physical and/or Sexual                      | Human Immunodeficiency Virus (HIV)                             | biomarker                            | HIV serostatus confirmed by blood / biomarker test                                      | HIV Positive Serostatus                                                                                  |
| Ehrensaft 2006 | New Zealand            | Prospective Cohort                                   | 1972-1998 | N/A       | 26            | 449               | 8               | Past 3 Years         | Partner Conflict Calendar (PCC)          | Physical                                    | Anxiety Disorders; Posttraumatic Stress                        | self-report                          | Diagnostic Interview                                                                    | Past Year Diagnosis of GAD                                                                               |

**Table S1: Summary characteristics of studies analyzed for intimate partner violence and five identified health outcomes.**

| Study             | Location Name               | Study Design            | Years     | Age Range | Mean Age (SD) | Total Sample Size | Follow-Up Years | Exposure Recall Type | Exposure Assessment Instrument                 | Violence Type          | Outcome                            | Outcome Assessment Method                                | Outcome Assessment Instrument                               | Outcome Definition                                      |
|-------------------|-----------------------------|-------------------------|-----------|-----------|---------------|-------------------|-----------------|----------------------|------------------------------------------------|------------------------|------------------------------------|----------------------------------------------------------|-------------------------------------------------------------|---------------------------------------------------------|
|                   |                             |                         |           |           |               |                   |                 |                      |                                                |                        | disorder; Depressive disorders     |                                                          | Schedule (DIS) or Diagnostic Interview Schedule-IV (DIS-IV) | or PTSD; Current Depression Determined by DIS or DIS-IV |
| Fonck 2005        | Kenya (Nairobi)             | Other (Cross-Sectional) | 1996-1997 | 0-99      | N/A           | 520               | N/A             | Lifetime             | Study-Specific Questionnaire                   | Physical               | Human Immunodeficiency Virus (HIV) | biomarker                                                | HIV serostatus confirmed by blood / biomarker test          | HIV Positive Serostatus                                 |
| Han 2019          | Republic Of Korea           | Prospective Cohort      | 2006-2007 | 19-99     | N/A           | 3,052             | 1               | Past Year            | Conflict Tactics Scale (CTS)                   | Physical               | Depressive Disorders               | self-report                                              | Center for Epidemiologic Studies Depression Scale (CES-D)   | Depression Determined By CES-D Score >=16               |
| Ibrahim 2015      | Egypt                       | Prospective Cohort      | 2010-2012 | 18-43     | N/A           | 1,857             | N/A             | During Pregnancy     | Study-Specific Questionnaire                   | Physical               | Maternal Abortion and Miscarriage  | administrative and medical records or disease registries | Hospital or Health Clinic Administrative Records            | Abortion past 20 weeks gestation                        |
| Jewkes 2010       | South Africa (Eastern Cape) | Prospective Cohort      | 2002-2006 | 16-23     | N/A           | 1,099             | 2               | Lifetime             | WHO Violence Against Women Questionnaire       | Physical and/or Sexual | Human Immunodeficiency Virus (HIV) | biomarker                                                | HIV serostatus confirmed by blood / biomarker test          | HIV Positive Serostatus                                 |
| Johri 2011        | Guatemala                   | Case-Control            | 2006-2006 | 15-49     | N/A           | 1,897             | N/A             | Past Year            | WHO Domestic Violence Questionnaire            | Physical and/or Sexual | Maternal Abortion and Miscarriage  | physician diagnosis                                      | Hospital or Health Clinic Administrative Records            | Pregnancy loss before 28 weeks gestation                |
| Kaslow 2000       | United States of America    | Case-Control            | 1995-1997 | 18-64     | 30.8(8.96)    | 285               | N/A             | Lifetime             | Index of Spouse Abuse (ISA)                    | Physical               | Suicide and Self-Harm              | administrative medical records or disease registries     | Hospital Administrative Records                             | Suicide Attempt Determined With Hospital Admittance     |
| Kouyoumdjian 2013 | Uganda                      | Prospective Cohort      | 2000-2009 | 15-49     | N/A           | 10,252            | 5.5             | Lifetime             | Conflict Tactics Scale modified version (CTS2) | Physical and/or Sexual | Human Immunodeficiency Virus (HIV) | biomarker                                                | HIV serostatus confirmed by blood / biomarker test          | HIV Positive Serostatus                                 |

**Table S1: Summary characteristics of studies analyzed for intimate partner violence and five identified health outcomes.**

| Study              | Location Name                                            | Study Design       | Years     | Age Range | Mean Age (SD) | Total Sample Size | Follow-Up Years | Exposure Recall Type | Exposure Assessment Instrument               | Violence Type                               | Outcome                                                        | Outcome Assessment Method                                         | Outcome Assessment Instrument                                                    | Outcome Definition                                                                  |
|--------------------|----------------------------------------------------------|--------------------|-----------|-----------|---------------|-------------------|-----------------|----------------------|----------------------------------------------|---------------------------------------------|----------------------------------------------------------------|-------------------------------------------------------------------|----------------------------------------------------------------------------------|-------------------------------------------------------------------------------------|
| Leung 2002         | China (Hong Kong Special Administrative Region of China) | Case-Control       | 1999-1999 | N/A       | 27(8)         | 501               | N/A             | Past Year            | Abuse Assessment Screen                      | Physical and/or Sexual                      | Maternal Abortion and Miscarriage                              | administrative and medical records or disease registries          | Hospital or Health Clinic Administrative Records                                 | Elective abortion                                                                   |
| Llosamartínez 2019 | Uruguay                                                  | Case-Control       | 2014-2015 | N/A       | 28.8(1)       | 58                | N/A             | Past Year            | Woman Abuse Screening Tool (Short Version)   | Physical and/or Sexual and/or Psychological | Depressive Disorders                                           | self-report                                                       | Beck Depression Inventory (BDI)                                                  | Depression Determined By BDI Score >17                                              |
| Makaroun 2020      | United States of America                                 | Prospective Cohort | 2014-2016 | 45+       | N/A           | 4,481             | 1.67            | Past Year            | Hurt, Insult, Threaten, Scream (E-HITS) Tool | Physical and/or Sexual                      | Suicide and Self-Harm; Anxiety Disorders; Depressive disorders | administrative medical records or disease registries              | Analysis of Hospital or Health Clinic and Administrative Data                    | Health Administrative Records; Lifetime Diagnosis of Anxiety Disorder or Depression |
| Maman 2002         | United Republic of Tanzania                              | Prospective Cohort | 1999      | 18-99     | N/A           | 245               | 0.25            | Lifetime             | Conflict Tactics Scale (CTS)                 | Physical and/or Sexual                      | Human Immunodeficiency Virus (HIV)                             | biomarker                                                         | HIV serostatus confirmed by blood / biomarker test                               | HIV Positive Serostatus                                                             |
| Nelson 2003        | United States Of America (Pennsylvania)                  | Case-Control       | 1999-2001 | 14-40     | N/A           | 1,199             | N/A             | Lifetime             | Index of Spousal Abuse                       | Physical                                    | Maternal Abortion and Miscarriage                              | self-report; administrative medical records or disease registries | Follow-up telephone interviews; Hospital or Health Clinic Administrative Records | Pregnancy loss before 22 weeks gestation                                            |
| Ouellet-Morin 2015 | Multiple Locations                                       | Prospective Cohort | 1994-2001 | N/A       | 40            | 978               | 7               | Unknown              | Conflict Tactics Scale (CTS)                 | Physical and/or Sexual and/or Psychological | Depressive Disorders                                           | self-report                                                       | Diagnostic Interview Schedule (DIS); Diagnostic Interview Schedule-IV (DIS-IV)   | Depression Determined by BDI Score >19                                              |



**Table S1: Summary characteristics of studies analyzed for intimate partner violence and five identified health outcomes.**

| Study             | Location Name                 | Study Design       | Years     | Age Range | Mean Age (SD) | Total Sample Size | Follow-Up Years | Exposure Recall Type       | Exposure Assessment Instrument | Violence Type                               | Outcome                                | Outcome Assessment Method                               | Outcome Assessment Instrument                                                                                                                                     | Outcome Definition                                                                      |
|-------------------|-------------------------------|--------------------|-----------|-----------|---------------|-------------------|-----------------|----------------------------|--------------------------------|---------------------------------------------|----------------------------------------|---------------------------------------------------------|-------------------------------------------------------------------------------------------------------------------------------------------------------------------|-----------------------------------------------------------------------------------------|
| Pico-Alfonso 2006 | Spain                         | Case-Control       | 2000-2002 | N/A       | 44.55         | 182               | N/A             | Lifetime                   | N/A                            | Physical and/or Psychological               | Depressive Disorders                   | self-report                                             | Beck Depression Inventory (BDI)                                                                                                                                   | Depression Determined by BDI Score >19                                                  |
| Romito 2009       | Italy (Friuli-Venezia Giulia) | Case-Control       | 2006-2007 | 30-99     | N/A           | 883               | N/A             | Past Year                  | Study-Specific Questionnaire   | Physical and/or Sexual                      | Maternal Abortion and Miscarriage      | administrative or medical records or disease registries | Hospital or Health Clinic Administrative Records                                                                                                                  | Elective abortion occurring before 12 weeks gestation                                   |
| Suglia 2011       | United States Of America      | Prospective Cohort | 1996-2000 | N/A       | 24.8(5.9)     | 2,030             | 3               | Prior to The Past One Year | Study-Specific Questionnaire   | Physical and/or Sexual                      | Anxiety Disorder; Depressive Disorders | self-report                                             | Composite International Diagnostic Interview (CIDI)                                                                                                               | Anxiety Disorders Determined by DSM-IV Criteria; Depression Determined by CIDI Score >3 |
| Taft 2008         | Australia                     | Prospective Cohort | 1996-2000 | 22-27     | N/A           | 9,333             | 4               | Lifetime                   | Conflict Tactics Scale (CTS)   | Physical and/or Sexual                      | Depressive Disorders                   | self-report                                             | Center for Epidemiologic Studies Depression Scale (CES-D)                                                                                                         | Depression Determined By CES-D Score >=10                                               |
| Taft 2019         | Australia                     | Prospective Cohort | 1996-2009 | 18-36     | N/A           | 9,021             | 4               | Prior to The Past One Year | Study-Specific Questionnaire   | Physical and/or Sexual and/or Psychological | Maternal Abortion and Miscarriage      | self-report                                             | Australian Longitudinal Study on Women's Health Study Questionnaire (asks participants how many times they have experience stillbirth, miscarriage, and abortion) | Abortion for reason other than medical abnormality                                      |

Table S1: Summary characteristics of studies analyzed for intimate partner violence and five identified health outcomes.

## Section 1.2: Data selection and sensitivity analyses for intimate partner violence

### Intimate partner violence and major depressive disorder

For major depressive disorder, we extracted 14 studies reporting an association with intimate partner violence (IPV). Among these studies, we identified two reporting on the Fragile Families and Child Wellbeing Study. We retained estimates from Suglia 2011 because the author exposure definitions more closely aligned with the GBD case definition of IPV. Suglia 2011 used the composite international diagnostic interview short form (CIDI-SF) during a follow-up interview. While the CIDI-SF is not typically an accepted symptom scale within the GBD, upon review of this specific study cohort (Fragile Families and Child Wellbeing Study) in consultation with the mental health team at IHME, the use of the CIDI-SF was accepted. We additionally identified two studies reporting on the Veteran’s Health Association Corporate Data Warehouse. We chose to retain estimates from Makaroun 2020 as the authors reported estimates specific to physical and/or sexual IPV while only an aggregate measure of IPV (including physical, sexual, and psychological violence) was available from the other study. These selections resulted in a total of 12 studies which formed our modeling input dataset.

Using these data, we undertook three sensitivity analyses. First, we ran a sensitivity analysis to test the impact of applying 10% trimming on model results. Without trimming 10% of outliers, results indicated greater between study heterogeneity ( $\gamma = 0.039$ ) and 0.0698 risk-outcome score (ROS).

Second, existing evidence from longitudinal studies has indicated that the relationship between intimate partner violence and depression may be bi-directional. Thus, we ran a sensitivity analysis using identified cohort studies only (excluding three case-control studies without control for baseline depression; Table S2). Model results from using a subset of cohort studies were similar to our main analysis (0.222 ROS).

Lastly, to assess the impact of including these author definitions which included exposure to psychological partner violence, we undertook a sensitivity analysis restricting to studies which only used an author definition which involved physical and/or sexual abuse (including those assessing physical violence only and sexual violence only). The results of this sensitivity analysis did not substantially differ from the main result (0.194 ROS; Table S2).

Table S2. Sensitivity analyses for intimate partner violence and major depressive disorder.

| Analysis                            | RR and 95%UI        | ROS    | Pub. Bias | Gamma    | No. of studies (no. observations) | Selected bias covariates |
|-------------------------------------|---------------------|--------|-----------|----------|-----------------------------------|--------------------------|
| <b>Main</b>                         | 2.09<br>(1.55-2.82) | 0.243  | 0         | 1.06E-06 | 12 (16)                           | --                       |
| <b>0% trimming</b>                  | 2.07<br>(1.03-4.19) | 0.0698 | 0         | 0.039    | 12 (16)                           | --                       |
| <b>Exclude case-control studies</b> | 2.01<br>(1.48-2.72) | 0.222  | 0         | 3.33E-06 | 9 (12)                            | --                       |

|                                                                                        |                    |       |   |          |        |    |
|----------------------------------------------------------------------------------------|--------------------|-------|---|----------|--------|----|
| <b>Exclude studies using exposure definitions which include psychological violence</b> | 1.91<br>(1.4-2.61) | 0.194 | 0 | 1.61E-05 | 7 (10) | -- |
|----------------------------------------------------------------------------------------|--------------------|-------|---|----------|--------|----|

MDD = Major Depressive Disorder; Pub. = publication; no. = number of; ROS = risk-outcome score.

#### Intimate partner violence and maternal abortion and miscarriage

For maternal abortion and miscarriage, we ran two sensitivity analyses. First, we tested the effect of trimming within our main model by undertaking an analysis without trimming outliers. In our model run without trimming two outlying studies, the estimated between-study heterogeneity was much higher than in our main results ( $\gamma = 0.385$ ) and resulting negative ROS (-0.341). Our second analysis tested the effect of excluding a study (Abdollahi 2015) which reported estimates from a sample with fewer than 10 cases of abortion/miscarriage in exposed and/or unexposed groups. The results of this analysis also showed a greater between-study heterogeneity ( $\gamma = 0.14$ ) and -0.169 ROS (Table S3).

Table S3. Sensitivity analyses for intimate partner violence and maternal abortion and miscarriage.

| Analysis                                                                      | RR and 95%UI         | ROS    | Pub. Bias | Gamma    | No. of studies (no. observations) | Selected bias covariates  |
|-------------------------------------------------------------------------------|----------------------|--------|-----------|----------|-----------------------------------|---------------------------|
| <b>Main</b>                                                                   | 2.03<br>(1.25-3.31)  | 0.15   | 0         | 6.19E-06 | 9 (11)                            | Current and/or recent IPV |
| <b>0% trimming</b>                                                            | 2.41<br>(0.375-15.5) | -0.341 | 0         | 0.385    | 9 (11)                            | Current and/or recent IPV |
| <b>Exclude studies with fewer than 10 cases in exposed / unexposed groups</b> | 2.01<br>(0.584-6.9)  | -0.169 | 0         | 0.14     | 8 (10)                            | Current and/or recent IPV |

Pub. = publication; no. = number of; ROS = risk-outcome score.

#### Intimate partner violence and HIV/AIDS

For HIV/AIDS, we undertook two sensitivity analyses. First, we tested the impact of applying 10% trimming on model results and found that results were not substantially different from our main analysis (with trimming: 0.0399 ROS). Second, because certain evidence suggests that HIV serostatus and/or the disclosure of one's serostatus may precipitate consequent IPV, we ran a second sensitivity analysis restricted to prospective cohort studies. Importantly, in our study identification process, we only accepted study designs in which exposure to violence preceded incident HIV infection (prospective cohorts) or designs in which study participants were unaware of their serostatus at the time that they reported exposure(s) to IPV, thus removing the possibility that serostatus may have caused exposure. Nonetheless, longitudinal cohort studies which measure HIV incidence using biomarkers provide the best evidence for a causal relationship. Our results estimated using only prospective cohort studies were consistent with our main analysis (0.0568 ROS; Table S4).

Table S4. Sensitivity analyses for intimate partner violence and HIV/AIDS.

| Analysis                                                    | RR and 95%UI        | ROS    | Pub. Bias | Gamma    | No. of studies (no. observations) | Selected bias covariates |
|-------------------------------------------------------------|---------------------|--------|-----------|----------|-----------------------------------|--------------------------|
| <b>Main</b>                                                 | 1.58<br>(1.06-2.34) | 0.0626 | 0         | 2.48E-06 | 6 (9)                             | --                       |
| <b>10% trimming</b>                                         | 1.53<br>(1.01-2.31) | 0.0399 | 0         | 2.94E-06 | 3 (4)                             | --                       |
| <b>Exclude study designs other than prospective cohorts</b> | 1.56<br>(1.05-2.32) | 0.0568 | 0         | 7.61E-10 | 6 (9)                             | --                       |

Pub. = publication; no. = number of; ROS = risk-outcome score.

#### Intimate partner violence and anxiety disorders

For anxiety disorders, we undertook two sensitivity analyses. First, we ran a sensitivity analysis to test the impact of applying 10% trimming on model results. With trimming 10% of outliers, results were consistent with our main analyses, albeit slightly more uncertain (Table S5). Second, to assess the impact of including these author definitions which included exposure to psychological partner violence, we undertook a sensitivity analysis restricting to studies which only used an author definition which involved physical and/or sexual abuse (including those assessing physical violence only and sexual violence only). The results of this sensitivity analysis did not substantially differ from the main result (-0.0988 ROS; Table S5).

Table S5. Sensitivity analyses for intimate partner violence and anxiety disorders.

| Analysis                                                                               | RR and 95%UI         | ROS         | Pub. Bias | Gamma  | No. of studies (no. observations) | Selected bias covariates                                   |
|----------------------------------------------------------------------------------------|----------------------|-------------|-----------|--------|-----------------------------------|------------------------------------------------------------|
| <b>Main</b>                                                                            | 2.57<br>(0.802-8.25) | -<br>0.0166 | 0         | 0.0961 | 5 (8)                             | Current and/or recent IPV                                  |
| <b>10% trimming</b>                                                                    | 2.39<br>(0.798-7.13) | -<br>0.0247 | 0         | 0.0764 | 5 (8)                             | Current and/or recent IPV                                  |
| <b>Exclude studies using exposure definitions which include psychological violence</b> | 2.4<br>(0.668-8.61)  | -<br>0.0988 | 0         | 0.109  | 4 (7)                             | Study at risk of selection bias, Current and/or recent IPV |

Pub. = publication; no. = number of; ROS = risk-outcome score.

#### Intimate partner violence and self-harm

For self-harm, we ran two sensitivity analyses. First, we tested the impact of applying 10% trimming on model results. With trimming a single outlying study, the overall estimated study-heterogeneity was much lower ( $\gamma < 0.001$ ), resulting in a three-star association (0.171 ROS).

Second, we ran our model excluding one study which used an alternate outcome definition defined as suicidal ideation and/or behavior (Makaroun 2020; Table S6).

Table S6. Sensitivity analyses for intimate partner violence and self-harm.

| Analysis                                                                                             | RR and 95%UI      | ROS    | Pub. Bias | Gamma    | No. of studies (no. observations) | Selected bias covariates |
|------------------------------------------------------------------------------------------------------|-------------------|--------|-----------|----------|-----------------------------------|--------------------------|
| <b>Main</b>                                                                                          | 2.99 (0.295-30.3) | -0.424 | 0         | 0.343    | 4 (6)                             | --                       |
| <b>10% trimming</b>                                                                                  | 4.63 (1.12-19.1)  | 0.171  | 0         | 3.98E-05 | 4 (6)                             | --                       |
| <b>Excluding one study using an alternate outcome definition of suicide ideation and/or behavior</b> | 2.5 (0.159-39.3)  | -0.697 | 0         | 0.429    | 3 (4)                             | --                       |

Pub. = publication; no. = number of; ROS = risk-outcome score.

### Section 1.3: Descriptive results for additional health-related outcomes considered in association with exposure to intimate partner violence.

While not meeting our three-study minimum, we additionally identified literature reporting the risk of specific maternal health outcomes in association with intimate partner violence, including maternal hypertensive disorders (n=2), gestational diabetes (n=2), maternal hemorrhage (n=2), alcohol use disorder (n=2) and sexually transmitted infection excluding HIV (n=2). Further, peripartum depression (n=8) and heavy episodic drinking (n=5) were well-studied health outcomes across extracted studies; however, as these outcomes are not yet included in GBD, we did not undertake a meta-analysis of these studies. Our consideration of these input studies are described further below.

#### Maternal health outcomes

We identified literature reporting the risk of maternal hypertensive disorders, gestational diabetes, and maternal hemorrhage; however, none of these outcomes met our minimum availability criteria of at least three studies identified. Peripartum depression was a well-studied outcome across extracted studies (n=8), and was defined as depression among pregnant or post-partum mothers up to one year after birth. All but one study used the Edinburgh Postnatal Depression Scale (EPDS) to measure peripartum depression; McMahon 2011 used the composite international diagnostic interview short form (CIDI-SF) during a follow-up interview at one-year post-partum. While the CIDI-SF is not typically an accepted symptom scale within the GBD, upon review of this specific study cohort (Fragile Families and Child Wellbeing Study) in consultation with the mental health team at IHME, the use of the CIDI-SF was accepted. Additionally, most studies measured IPV during pregnancy, although one measured lifetime occurrence of IPV while another measured any IPV experienced in the past year (Extended data figure 5).

## Heavy episodic drinking and alcohol use disorder

Heavy episodic drinking is an outcome which does not correspond directly to the GBD cause of alcohol use disorder but reflects a pattern of heavy and/or harmful alcohol use. We extracted five studies which measured the risk of heavy episodic (binge) drinking in association with exposure to physical and/or sexual IPV. Case definitions for heavy drinking varied across studies (Table S7). In general, included studies did not show a strong association between heavy episodic drinking and IPV, with only one study showing a significantly harmful effect (Extended data figure 5). We also identified and extracted two studies which measured alcohol use disorder according to DSM criteria, which does map to the GBD cause of alcohol use disorder but did not meet our minimum availability criteria to undertake a BPRF analysis (i.e., at least three studies). Similar to the studies identified for heavy episodic drinking, these studies showed inconsistent results (Extended data figure 5).

Table S7: Case definitions for heavy episodic (binge) drinking by study.

| <b>Study</b> | <b>Outcome definition</b>                                                                                                            |
|--------------|--------------------------------------------------------------------------------------------------------------------------------------|
| Nowotny 2013 | Binge drinking defined as drinking five or more drinks during a single occasion at least two to three times a month in the past year |
| Martino 2005 | Past-month heavy alcoholic drinking (days on which they had four or more alcoholic drinks on the same occasion)                      |
| Gao 2010     | Drank six or more alcoholic drinks on at least one occasion in the last 12 months                                                    |
| Gilbert 2012 | Binge drinking (not further defined)                                                                                                 |
| Dichter 2017 | ICD-9 or 10 code for alcohol abuse                                                                                                   |

Section 1.4: Data inputs for childhood sexual abuse studies

Table S8: Summary characteristic of studies analyzed for childhood sexual abuse and 15 identified health outcomes.

**Table S8: Summary characteristic of studies analyzed for childhood sexual abuse and 15 identified health outcomes.**

| Study         | Location Name            | Study Design       | Years     | Sex    | Age Range | Mean Age (SD) | Total Sample Size | Exposure Recall Type | Exposure Assessment Method            | Exposure Assessment Instrument                       | Age of Exposure | Perpetrator | Outcome                               | Outcome Assessment Method        | Outcome Assessment Instrument                                                                                                                                        | Outcome Definition                                                                    |
|---------------|--------------------------|--------------------|-----------|--------|-----------|---------------|-------------------|----------------------|---------------------------------------|------------------------------------------------------|-----------------|-------------|---------------------------------------|----------------------------------|----------------------------------------------------------------------------------------------------------------------------------------------------------------------|---------------------------------------------------------------------------------------|
| Abajobir 2017 | Australia                | Prospective Cohort | 1981-2004 | Both   | 21-21     | N/A           | 3,762             | Lifetime             | Administrative records                | Administrative Records                               | 0-14            | Any         | Asthma                                | self-report; physician diagnosis | Self-reported diagnosis of Asthma by a physician (ever been told by a physician that they had asthma)                                                                | Lifetime Diagnosis of Asthma                                                          |
| Abajobir 2018 | Australia                | Prospective Cohort | 1981-2004 | Female | 19-22     | N/A           | 1,980             | Lifetime             | Administrative records                | Administrative Records                               | 0-14            | Any         | Maternal Abortion and Miscarriage     | self-report                      | Study-Specific Questionnaire (survey items where participants asked to report number of times they experienced pregnancy, termination of pregnancy, and miscarriage) | Lifetime Experience of Miscarriage                                                    |
| Andrews 1995  | United Kingdom           | Prospective Cohort | 1980-1989 | Female | 15-28     | N/A           | 101               | Lifetime             | Self-reported                         | Study-Specific Questionnaire                         | 0-17            | Any         | Bulimia Nervosa; Depressive Disorders | self-report                      | Present State Examination (PSE)                                                                                                                                      | Bulimia Nervosa or Past Year Major Depressive Disorder Determined by DSM-III Criteria |
| Banyard 2004  | United States of America | Prospective Cohort | 1973-1990 | Male   | N/A       | 26.5          | 106               | Lifetime             | Self-reported; Administrative records | Administrative Records; Study-Specific Questionnaire | 0-17            | Any         | Suicide And Self-Harm                 | self-report                      | Study-Specific Questionnaire (survey item asking the participant if he or she had ever intentionally tried to take his or her life)                                  | Lifetime Experience of Suicide Attempt                                                |



**Table S8: Summary characteristic of studies analyzed for childhood sexual abuse and 15 identified health outcomes.**

| Study           | Location Name                       | Study Design       | Years     | Sex           | Age Range | Mean Age (SD) | Total Sample Size    | Exposure Recall Type | Exposure Assessment Method            | Exposure Assessment Instrument                      | Age of Exposure | Perpetrator | Outcome                                                                           | Outcome Assessment Method | Outcome Assessment Instrument                                                                                                                                                                                                               | Outcome Definition                                                                                                  |
|-----------------|-------------------------------------|--------------------|-----------|---------------|-----------|---------------|----------------------|----------------------|---------------------------------------|-----------------------------------------------------|-----------------|-------------|-----------------------------------------------------------------------------------|---------------------------|---------------------------------------------------------------------------------------------------------------------------------------------------------------------------------------------------------------------------------------------|---------------------------------------------------------------------------------------------------------------------|
| Bentivegna 2022 | United Kingdom                      | Prospective Cohort | 2000-2019 | Female ; Male | 17-17     | N/A           | 5,119 (F); 4,852 (M) | Past Year            | Self-reported                         | Study-Specific Questionnaire                        | 17-17           | Any         | Suicide And Self-Harm                                                             | self-report               | Study-Specific Questionnaire (participants asked whether they hurt themselves on purpose in the previous 12 months by cutting, burning, or bruising, or by taking an overdose, pulling out their hair, or hurting themselves in other ways) | Past Year Self Harm                                                                                                 |
| Bifulco 1991    | United Kingdom (Islington)          | Prospective Cohort | 1989-1991 | Female        | 18-50     | N/A           | 286                  | Lifetime             | Self-reported                         | Study-Specific Questionnaire                        | 0-17            | Any         | Depressive Disorders                                                              | self-report               | Present State Examination (PSE)                                                                                                                                                                                                             | Past Three Years Depression Determined By PSE                                                                       |
| Borges 2021     | Mexico (Mexico City)                | Prospective Cohort | 2005-2013 | Both          | 19-26     | N/A           | 1,054                | Lifetime             | Self-reported                         | Composite International Diagnostic Interview (CIDI) | 0-18            | Any         | Suicide And Self-Harm; Alcohol Abuse or Dependence; Substance Abuse or Dependence | self-report               | Composite International Diagnostic Interview (CIDI)                                                                                                                                                                                         | Suicide Attempt Since Baseline Survey; Alcohol Dependence or Substance Use Disorders Determined by DSM-III Criteria |
| Brown 1999      | United States of America (New York) | Prospective Cohort | 1975-1992 | Both          | 18-99     | N/A           | 580                  | Lifetime             | Self-reported; Administrative records | Administrative Records                              | 0-18            | Any         | Suicide And Self-Harm                                                             | self-report               | Study-Specific Questionnaire ("suicide attempts were reported and described by children with regard to method, frequency, and associated treatment")                                                                                        | Suicide Attempt At Ages >=18                                                                                        |

**Table S8: Summary characteristic of studies analyzed for childhood sexual abuse and 15 identified health outcomes.**

| Study                | Location Name                         | Study Design         | Years     | Sex           | Age Range | Mean Age (SD) | Total Sample Size | Exposure Recall Type | Exposure Assessment Method            | Exposure Assessment Instrument                               | Age of Exposure | Perpetrator | Outcome                                                                | Outcome Assessment Method        | Outcome Assessment Instrument                                                                                                                              | Outcome Definition                                                                                   |
|----------------------|---------------------------------------|----------------------|-----------|---------------|-----------|---------------|-------------------|----------------------|---------------------------------------|--------------------------------------------------------------|-----------------|-------------|------------------------------------------------------------------------|----------------------------------|------------------------------------------------------------------------------------------------------------------------------------------------------------|------------------------------------------------------------------------------------------------------|
| Chapman 2004         | United States of America (California) | Retrospective Cohort | 1995-1996 | Female ; Male | N/A       | 56.6          | 9460              | Lifetime             | Self-reported                         | ACE Study Questionnaire                                      | 0-18            | Any         | Depressive Disorders                                                   | self-report                      | Diagnostic Interview Schedule (DIS); Center for Epidemiologic Studies Depression Scale (CES-D)                                                             | Past Year Depression Determined by Study Specific Criteria                                           |
| Chatziioannidis 2019 | Greece                                | Case-Control         | 2015-2019 | Both          | 0-65      | 40(10)        | 124               | Lifetime             | Self-reported                         | Childhood Experience of Care and Abuse Questionnaire (CECAQ) | 0-18            | Any         | Schizophrenic And Psychotic Disorders                                  | physician diagnosis              | Diagnosis of Schizophrenia based on chart review and confirmed with use of Greek Version of the Mini-International Neuropsychiatric Interview 5.0.0 (MINI) | Schizophrenia Determined by DSM-IV Criteria                                                          |
| Cheasty 1998         | Ireland                               | Case-Control         | 1996-1997 | Female        | 18-87     | N/A           | 237               | Lifetime             | Self-reported                         | Study-Specific Questionnaire                                 | 0-16            | Any         | Depressive Disorders                                                   | self-report; physician diagnosis | Screening questionnaire (not specified) and Beck Depression Inventory (BDI)                                                                                | Depression Determined by initial screening questionnaire and confirmed by cut off score of 12 on BDI |
| Chen 2014            | China                                 | Case-Control         | 2009-2011 | Female        | 30-60     | N/A           | 11,115            | Lifetime             | Self-reported                         | Study-Specific Questionnaire                                 | 0-16            | Any         | Suicide And Self-Harm                                                  | self-report                      | Composite International Diagnostic Interview (CIDI)                                                                                                        | Lifetime Experience of Suicide Attempt or Suicidal Ideation                                          |
| Cohen 2001           | United States of America (New York)   | Prospective Cohort   | 1975-1994 | Both          | 18-29     | N/A           | 664               | Lifetime             | Self-reported; Administrative records | Administrative Records; Study-Specific Questionnaire         | 0-18            | Non-Partner | Anxiety Disorders; Depressive Disorders; Substance Abuse or Dependence | self-report                      | Diagnostic Interview Schedule for Children (DISC-1)                                                                                                        | Anxiety Disorders, Depressive Disorders, or Substance Use Disorders Determined by DSM-III Criteria   |

**Table S8: Summary characteristic of studies analyzed for childhood sexual abuse and 15 identified health outcomes.**

| Study         | Location Name                             | Study Design       | Years     | Sex           | Age Range | Mean Age (SD) | Total Sample Size    | Exposure Recall Type | Exposure Assessment Method   | Exposure Assessment Instrument                     | Age of Exposure | Perpetrator | Outcome                                                                                           | Outcome Assessment Method                            | Outcome Assessment Instrument                       | Outcome Definition                                                                                                                                  |
|---------------|-------------------------------------------|--------------------|-----------|---------------|-----------|---------------|----------------------|----------------------|------------------------------|----------------------------------------------------|-----------------|-------------|---------------------------------------------------------------------------------------------------|------------------------------------------------------|-----------------------------------------------------|-----------------------------------------------------------------------------------------------------------------------------------------------------|
| Comijs 2013   | Netherlands                               | Case-Control       | 2007-2010 | Both          | 60-93     | N/A           | 508                  | Lifetime             | Self-reported                | Study-Specific Questionnaire                       | 0-16            | Any         | Depressive Disorders                                                                              | self-report                                          | Composite International Diagnostic Interview (CIDI) | Depressive Disorders Determined by DSM-IV Criteria                                                                                                  |
| Conroy 2009   | Australia                                 | Case-Control       | 2005      | Female ; Male | N/A       | 35            | 571 (F); 742 (M)     | Lifetime             | Self-reported                | Study-Specific-Questionnaire                       | 0-18            | Any         | Substance Abuse or Dependence                                                                     | NA                                                   | Enrollment in a Pharmacotherapy program             | Clinical Determination of Opioid Dependence                                                                                                         |
| Coogan 2013   | United States of America                  | Prospective Cohort | 1995-2011 | Female        | 21-99     | N/A           | 28,456               | Lifetime             | Self-reported                | Conflict Tactics Scale (CTS)                       | 0-11            | Any         | Asthma                                                                                            | self-report                                          | Self-reported physician's diagnosis of asthma       | Diagnosis of Asthma at Ages >=18 or Use of Asthma Treatment >=3 Times/Week                                                                          |
| Copeland 2018 | United States of America (North Carolina) | Prospective Cohort | 1993-2015 | Both          | 19-30     | N/A           | 1420                 | Lifetime             | Self-reported; Parent Report | Child And Adolescent Psychiatric Assessment (CAPA) | 0-16            | Any         | Anxiety Disorders; Depressive disorders                                                           | self-report                                          | Young Adult Psychiatric Assessment (YAPA)           | Anxiety Disorders and Depression at Ages >=18 Determined by DSM-IV criteria                                                                         |
| Cutajar 2010  | Australia                                 | Case-Control       | 1964-1995 | Female ; Male | 12-43     | N/A           | 4,208 (F); 1,157 (M) | Lifetime             | Administrative records       | Administrative Records                             | 0-18            | Any         | Alcohol Abuse or Dependence; Substance Abuse or Dependence; Schizophrenic And Psychotic Disorders | administrative medical records or disease registries | Administrative Records                              | Alcohol Abuse or Substance Abuse Documented in the Victorian Psychiatric Case Register (VPCR); Schizophrenia Disorder Determined by DSM-IV Criteria |

**Table S8: Summary characteristic of studies analyzed for childhood sexual abuse and 15 identified health outcomes.**

| Study          | Location Name            | Study Design         | Years     | Sex    | Age Range | Mean Age (SD) | Total Sample Size | Exposure Recall Type | Exposure Assessment Method | Exposure Assessment Instrument                                    | Age of Exposure | Perpetrator | Outcome                                                                                     | Outcome Assessment Method | Outcome Assessment Instrument                                                                                                                                                                             | Outcome Definition                                                                                                                                |
|----------------|--------------------------|----------------------|-----------|--------|-----------|---------------|-------------------|----------------------|----------------------------|-------------------------------------------------------------------|-----------------|-------------|---------------------------------------------------------------------------------------------|---------------------------|-----------------------------------------------------------------------------------------------------------------------------------------------------------------------------------------------------------|---------------------------------------------------------------------------------------------------------------------------------------------------|
| Demakakos 2020 | United Kingdom (England) | Retrospective Cohort | 2002-2007 | Female | 55-89     | N/A           | 2,795             | Lifetime             | Self-reported              | 2007 Elsa Life History Interview                                  | 0-16            | Any         | Maternal Abortion and Miscarriage                                                           | self-report               | Study-Specific Questionnaire (respondents were asked to remember all pregnancies that did not result in live birth including any experience of miscarriage, as a part of reproductive history interviews) | Lifetime Experience of 2 or More Miscarriages                                                                                                     |
| Deyessa 2018   | Ethiopia (Addis Ababa)   | Case-Control         | 2014-2014 | Female | 15-49     | N/A           | 510               | Lifetime             | Self-reported              | Study-Specific Questionnaire                                      | 0-18            | Any         | Human Immunodeficiency Virus (HIV)                                                          | biomarker                 | HIV serostatus confirmed by blood / biomarker test                                                                                                                                                        | HIV Positive Serostatus                                                                                                                           |
| Dinwiddie 2000 | Australia                | Retrospective Cohort | 1978-1993 | Both   | N/A       | 43            | 107 (F); 25 (M)   | Lifetime             | Self-reported              | Semi-Structured Assessment for the Genetics of Alcoholism (SSAGA) | 0-18            | Any         | Suicide And Self-Harm; Alcohol Abuse or Dependence; Anxiety Disorders; Depressive Disorders | self-report               | Semi-Structured Assessment for the Genetics of Alcoholism (SSAGA)                                                                                                                                         | Lifetime Experience of Suicide Attempt; Alcohol Use, Social Phobia, Conduct Disorder, or Major Depressive Disorder Determined by DSM-III Criteria |

**Table S8: Summary characteristic of studies analyzed for childhood sexual abuse and 15 identified health outcomes.**

| Study       | Location Name                         | Study Design         | Years     | Sex          | Age Range | Mean Age (SD) | Total Sample Size  | Exposure Recall Type | Exposure Assessment Method | Exposure Assessment Instrument                                                                                                                | Age of Exposure | Perpetrator | Outcome                                     | Outcome Assessment Method | Outcome Assessment Instrument                                                                                                                                                                                                                                                                   | Outcome Definition                                                                       |
|-------------|---------------------------------------|----------------------|-----------|--------------|-----------|---------------|--------------------|----------------------|----------------------------|-----------------------------------------------------------------------------------------------------------------------------------------------|-----------------|-------------|---------------------------------------------|---------------------------|-------------------------------------------------------------------------------------------------------------------------------------------------------------------------------------------------------------------------------------------------------------------------------------------------|------------------------------------------------------------------------------------------|
| Dong 2004   | United States of America (California) | Retrospective Cohort | 1995-1997 | Both         | N/A       | 56(15.2)      | 17,337             | Lifetime             | Self-reported              | Conflict Tactics Scale (CTS); Childhood Trauma Questionnaire (CTQ)                                                                            | 0-18            | Any         | Cardiovascular Diseases (CVD)               | self-report               | Standardized medical examination (history of ischemic heart disease defined as a positive response to any of 3 questions: "have you had or ever been told you have a heart attack (coronary)?", "Do you get pain or heavy pressure in your chest with exertion?", "do you use nitroglycerine?") | Self-reported history of ischemic heart disease                                          |
| Dube 2005   | United States of America (California) | Retrospective Cohort | 1995-1997 | Female; Male | N/A       | 56(15.2)      | 9367 (F); 7970 (M) | Lifetime             | Self-reported              | Study-Specific Questionnaire                                                                                                                  | 0-18            | Any         | Suicide And Self-Harm; Depressive Disorders | self-report               | Study-Specific Questionnaire (respondents asked if ever attempted to commit suicide)                                                                                                                                                                                                            | Lifetime Experience of Suicide Attempt; Depression Determined By Study Specific Criteria |
| Duncan 2008 | United States of America              | Retrospective Cohort | 2002-2003 | Both         | 15-30     | 22.64(4.44)   | 819                | Before 16            | Self-reported              | semi-structured assessment for the genetics of alcoholism (SSAGA) and adaptation of the trauma assessment from the national comorbidity study | 0-16            | Any         | Substance Abuse or Dependence               | self-report               | Semi-Structured Assessment for the Genetics of Alcoholism (SSAGE)                                                                                                                                                                                                                               | Cannabis Use or Dependence Determined by DSM-IV Criteria                                 |

**Table S8: Summary characteristic of studies analyzed for childhood sexual abuse and 15 identified health outcomes.**

| Study          | Location Name            | Study Design       | Years     | Sex           | Age Range | Mean Age (SD) | Total Sample Size | Exposure Recall Type | Exposure Assessment Method | Exposure Assessment Instrument | Age of Exposure | Perpetrator                | Outcome                                                                     | Outcome Assessment Method                   | Outcome Assessment Instrument                                                                                                                         | Outcome Definition                                                                                                  |
|----------------|--------------------------|--------------------|-----------|---------------|-----------|---------------|-------------------|----------------------|----------------------------|--------------------------------|-----------------|----------------------------|-----------------------------------------------------------------------------|---------------------------------------------|-------------------------------------------------------------------------------------------------------------------------------------------------------|---------------------------------------------------------------------------------------------------------------------|
| Duncan 2015    | United States of America | Prospective Cohort | 1994-2009 | Female ; Male | 24-34     | N/A           | 3,699             | Lifetime             | Self-reported              | Study-Specific Questionnaire   | 0-12            | Family Member or Caregiver | Diabetes (Type 2)                                                           | self-report; physician diagnosis; biomarker | Biomarker; Self-reported taking anti-diabetic medication; Report of receiving a diagnosis of diabetes or high blood glucose by a health care provider | HbA1c >=6.5%; Fasting Glucose >=126 mg/dL; Non fasting Blood Glucose >=200 mg/dL; or Lifetime Diagnosis of Diabetes |
| Ebert 2019     | Belgium                  | Prospective Cohort | 2014-2015 | Both          | 18-99     | N/A           | 2,242             | Lifetime             | Self-reported              | Study-Specific Questionnaire   | 0-17            | Any                        | Depressive Disorders                                                        | self-report                                 | Composite International Diagnostic Interview (CIDI)                                                                                                   | Depressive Disorders Determined by CIDI-SC Criteria                                                                 |
| Enns 2006      | Netherlands              | Prospective Cohort | 1996-1999 | Both          | 18-64     | N/A           | 5,670             | Lifetime             | Self-reported              | Study-Specific Questionnaire   | 0-16            | Anyone Or Not Specified    | Suicide And Self-Harm                                                       | self-report                                 | Composite International Diagnostic Interview (CIDI)                                                                                                   | Lifetime Experience of Suicide Attempt                                                                              |
| Fenton 2013    | United States of America | Prospective Cohort | 2001-2005 | Both          | 18-99     | N/A           | 27,712            | Lifetime             | Self-reported              | Study-Specific Questionnaire   | 0-18            | Family Member or Caregiver | Alcohol Abuse or Dependence                                                 | self-report                                 | NIAAA Alcohol Use Disorder and Associated Disabilities – DSM-IV Version (AUDADIS-IV)                                                                  | Alcohol Dependence Determined by DSM-IV Criteria                                                                    |
| Fergusson 1996 | New Zealand              | Prospective Cohort | 1993-1995 | Both          | 18-18     | N/A           | 1,019             | Lifetime             | Self-reported              | Study-Specific Questionnaire   | 0-16            | Any                        | Alcohol Abuse or Dependence; Substance Abuse or Dependence Conduct Disorder | self-report                                 | Composite International Diagnostic Interview (CIDI); Self-Report Delinquency Instrument (SRDI)                                                        | Diagnosis or Alcohol or Substance Abuse or Dependence; Conduct Disorder Determined by DSM-IV Criteria               |
| Fergusson 2008 | New Zealand              | Prospective Cohort | 1977-2022 | Both          | 16-25     | N/A           | 1,001             | Lifetime             | Self-reported              | Study-Specific Questionnaire   | 0-16            | Any                        | Anxiety Disorders; Depressive disorders                                     | self-report                                 | Composite International Diagnostic Interview (CIDI)                                                                                                   | Anxiety Disorders and MDD Between Ages 16-25 Determined by DSM-IV criteria                                          |

**Table S8: Summary characteristic of studies analyzed for childhood sexual abuse and 15 identified health outcomes.**

| Study                 | Location Name              | Study Design       | Years     | Sex    | Age Range | Mean Age (SD) | Total Sample Size | Exposure Recall Type | Exposure Assessment Method | Exposure Assessment Instrument                  | Age of Exposure | Perpetrator | Outcome                                                     | Outcome Assessment Method                                                                         | Outcome Assessment Instrument                                                                                                                                                       | Outcome Definition                                                                                                     |
|-----------------------|----------------------------|--------------------|-----------|--------|-----------|---------------|-------------------|----------------------|----------------------------|-------------------------------------------------|-----------------|-------------|-------------------------------------------------------------|---------------------------------------------------------------------------------------------------|-------------------------------------------------------------------------------------------------------------------------------------------------------------------------------------|------------------------------------------------------------------------------------------------------------------------|
| Fortin-Langelier 2019 | Canada                     | Case-Control       | 2001-2010 | Female | N/A       | 11.42(4.21)   | 1,322             | Lifetime             | Administrative records     | Administrative Records                          | 1-17            | Any         | Maternal Abortion and Miscarriage                           | administrative medical records or disease registries                                              | Administrative Records                                                                                                                                                              | Pregnancy loss determined via administrative records                                                                   |
| Fujiwara 2011         | Japan                      | Case-Control       | 2002-2004 | Both   | N/A       | 50.8(0.6)     | 1,722             | Lifetime             | Self-reported              | National Comorbidity Survey Replication (NCS-R) | 0-18            | Any         | Anxiety Disorders                                           | self-report                                                                                       | Composite International Diagnostic Interview (CIDI)                                                                                                                                 | Anxiety Disorders Determined by DSM-IV Criteria                                                                        |
| Galloeag 2017         | Brazil (Rio Grande Do Sul) | Prospective Cohort | 1993-2012 | Female | N/A       | 18            | 1,954             | Lifetime             | Self-reported              | Childhood Trauma Questionnaire (CTQ)            | 0-15            | Any         | Depressive Disorders                                        | self-report                                                                                       | Mini-International Neuropsychiatric Interview (MINI)                                                                                                                                | Depression Determined by Study Specific Criteria                                                                       |
| Guiney 2022           | New Zealand                | Prospective Cohort | 1972-2019 | Both   | 18-45     | N/A           | 937               | Lifetime             | Self-reported              | Study-Specific Questionnaire                    | 0-16            | Any         | Suicide And Self-Harm; Sexually Transmitted Infection (STI) | self-report; administrative medical records or disease registries; physician diagnosis; biomarker | Structured interviews about self-harm and suicide; Self-reported diagnosis of sexually transmitted disease; Enzyme immunoassay analysis of serum samples for Herpes Simplex Virus 2 | Lifetime Experience of Suicide Attempt; Self-reported Past Diagnosis of STI; Seropositivity for Herpes Simplex Virus 2 |
| Han 2022              | Multiple Locations         | Prospective Cohort | 2006-2017 | Both   | 40-69     | 54.2(7.9)     | 81,105            | Lifetime             | Self-reported              | Childhood Trauma Questionnaire (CTQ)            | 0-18            | Any         | Asthma                                                      | self-report; physician diagnosis                                                                  | Self-report of receiving a diagnosis of asthma by a doctor <i>and</i> a yes answer to “in the last year, have you ever had wheeze or whistling in the chest?”                       | Lifetime Diagnosis of Asthma with past year experience of wheezing                                                     |

**Table S8: Summary characteristic of studies analyzed for childhood sexual abuse and 15 identified health outcomes.**

| Study         | Location Name                    | Study Design         | Years     | Sex           | Age Range | Mean Age (SD) | Total Sample Size    | Exposure Recall Type | Exposure Assessment Method     | Exposure Assessment Instrument                                      | Age of Exposure | Perpetrator                | Outcome                              | Outcome Assessment Method | Outcome Assessment Instrument                                                                                                                                                                                        | Outcome Definition                                                                    |
|---------------|----------------------------------|----------------------|-----------|---------------|-----------|---------------|----------------------|----------------------|--------------------------------|---------------------------------------------------------------------|-----------------|----------------------------|--------------------------------------|---------------------------|----------------------------------------------------------------------------------------------------------------------------------------------------------------------------------------------------------------------|---------------------------------------------------------------------------------------|
| Haydon 2011   | United States of America         | Prospective Cohort   | 1994-2008 | Female ; Male | N/A       | 15.9          | 4,955 (F); 3,967 (M) | Lifetime             | Self-reported                  | Study-Specific Questionnaire                                        | 0-18            | Parent Or Adult Caregiver  | Sexually Transmitted Infection (STI) | self-report; biomarker    | Study-Specific Questionnaire (self-report of having been told by a doctor or nurse that they had chlamydia, gonorrhea, or trichomoniasis); Biomarker (urine test-identified chlamydia, gonorrhea, or trichomoniasis) | Self-reported diagnosis of or test-identified chlamydia, gonorrhea, or trichomoniasis |
| Houteven 2020 | United Kingdom (City of Bristol) | Prospective Cohort   | 1991-2009 | Both          | 22-22     | N/A           | 9,959                | Lifetime             | Self-reported; Parental Report | ACE Study Questionnaire                                             | 0-15            | Any                        | Depressive Disorders                 | self-report               | Clinical Interview Schedule-Revised (CIS-R)                                                                                                                                                                          | Depressive Disorders Determined by ICD-10 Criteria                                    |
| Hovens 2015   | Netherlands                      | Retrospective Cohort | 2004-2007 | Both          | 18-64     | 42.6(13.9)    | 1,038                | Lifetime             | Self-reported                  | Study-Specific Questionnaire                                        | 0-16            | Any                        | Anxiety Disorders                    | self-report               | Composite International Diagnostic Interview (CIDI)                                                                                                                                                                  | Past 2 Years Anxiety Disorders or Depressive Disorders Determined by DSM-IV Criteria  |
| Huang 2011    | United States of America         | Prospective Cohort   | 1995-2002 | Both          | 18-26     | 21.8(0.12)    | 4,882                | Lifetime             | Self-reported                  | Conflicts tactics scale (CTS); Childhood Trauma Questionnaire (CTQ) | 0-12            | Family Member or Caregiver | Substance Abuse or Dependence        | self-report               | Study-Specific Questionnaire (self-reported use of illicit drugs including marijuana, cocaine, crystal methamphetamines , and others)                                                                                | Lifetime Substance Use                                                                |
| Jaffee 2002   | New Zealand                      | Retrospective Cohort | 1972-2002 | Both          | N/A       | 26            | 998                  | Lifetime             | Self-reported                  | Study-Specific Questionnaire                                        | 0-12            | Any                        | Depressive Disorders                 | self-report               | Diagnostic Interview Schedule for Children (DISC-1); Diagnostic Interview Schedule (DIS)                                                                                                                             | Major Depressive Disorder at Age >17 Determined by DSM-III Criteria                   |



**Table S8: Summary characteristic of studies analyzed for childhood sexual abuse and 15 identified health outcomes.**

| Study          | Location Name                       | Study Design         | Years     | Sex    | Age Range | Mean Age (SD) | Total Sample Size | Exposure Recall Type | Exposure Assessment Method                     | Exposure Assessment Instrument                                | Age of Exposure | Perpetrator                             | Outcome                                                                                                              | Outcome Assessment Method | Outcome Assessment Instrument                                                                                                                                                                           | Outcome Definition                                                                                                                |
|----------------|-------------------------------------|----------------------|-----------|--------|-----------|---------------|-------------------|----------------------|------------------------------------------------|---------------------------------------------------------------|-----------------|-----------------------------------------|----------------------------------------------------------------------------------------------------------------------|---------------------------|---------------------------------------------------------------------------------------------------------------------------------------------------------------------------------------------------------|-----------------------------------------------------------------------------------------------------------------------------------|
| Kalichman 2001 | United States of America (Georgia)  | Retrospective Cohort | 1999-1999 | Male   | 17-72     | N/A           | 474               | Lifetime             | Self-reported                                  | Study-Specific Questionnaire                                  | 0-16            | Any                                     | Substance Abuse or Dependence                                                                                        | self-report               | Study-Specific Questionnaire (participants asked about use of illegal substances including marijuana, nitrite inhalants or poppers, powder and crack cocaine, and methamphetamine in previous 6 months) | Past 6 Months Illicit Drug Use                                                                                                    |
| Kascakova 2022 | Czechia                             | Retrospective Cohort | 2016-2016 | Both   | 15+       | N/A           | 2,818             | Lifetime             | Self-reported                                  | Childhood Trauma Questionnaire (CTQ)                          | 0-18            | Any                                     | Asthma; Cardiovascular Diseases (CVD); Diabetes (Type 2)                                                             | self-report               | Self-reported history of asthma, ischemic heart disease, diabetes obtained during long-term health complaint interview                                                                                  | Lifetime Diagnosis of Asthma, CVD, or Diabetes                                                                                    |
| Kaukinen 2005  | United States of America            | Retrospective Cohort | 1994-1996 | Female | 18+       | N/A           | 7,689             | Lifetime             | Self-reported                                  | [study specific questionnaire on age at first sexual assault] | 0-14            | Any                                     | Substance Abuse or Dependence                                                                                        | self-report               | [study specific questionnaire on frequency and type of substance use]                                                                                                                                   | Past Month Illicit Drug Use                                                                                                       |
| Kendler 2000   | United States of America (Virginia) | Retrospective Cohort | 1987-1997 | Female | 17-55     | 30.1(7.6)     | 1411              | Lifetime             | Self-reported; Report by The Participants Twin | The Study-Specific Questionnaire                              | 0-16            | Any Adult or Person Older Than Yourself | Alcohol Abuse or Dependence; substance Abuse or Dependence; Anxiety Disorders; Depressive Disorders; Bulimia Nervosa | self-report               | Adaptation of the Structured clinical Interview for DSM-III-R criteria                                                                                                                                  | Alcohol or Substance Abuse or Dependence Determined by DSM-III Criteria; GAD, MDD, Bulimia Nervosa Determined by DSM-III Criteria |

**Table S8: Summary characteristic of studies analyzed for childhood sexual abuse and 15 identified health outcomes.**

| Study        | Location Name                        | Study Design         | Years     | Sex    | Age Range | Mean Age (SD) | Total Sample Size | Exposure Recall Type | Exposure Assessment Method            | Exposure Assessment Instrument                           | Age of Exposure | Perpetrator                | Outcome                               | Outcome Assessment Method | Outcome Assessment Instrument                                                                                                                                                    | Outcome Definition                                                               |
|--------------|--------------------------------------|----------------------|-----------|--------|-----------|---------------|-------------------|----------------------|---------------------------------------|----------------------------------------------------------|-----------------|----------------------------|---------------------------------------|---------------------------|----------------------------------------------------------------------------------------------------------------------------------------------------------------------------------|----------------------------------------------------------------------------------|
| Kerkar 2021  | United States of America (Louisiana) | Retrospective Cohort | 2011-2016 | Female | 18-45     | N/A           | 1,050             | Lifetime             | Self-reported                         | Study-Specific Questionnaire                             | 0-18            | Any                        | Maternal Abortion and Miscarriage     | self-report               | Study-Specific Questionnaire (participants asked the outcome of each pregnancy [miscarriage, abortion, stillbirth, livebirth, molar/ectopic] during pregnancy history interview) | Experience of Abortion/Miscarriage at First Pregnancy and Any Pregnancy          |
| Kisely 2021  | Australia                            | Prospective Cohort   | 1981-2011 | Both   | N/A       | 30            | 2,425             | Lifetime             | Self-reported; Administrative records | Administrative Records                                   | 0-18            | Any                        | Anxiety Disorders                     | self-report               | Composite International Diagnostic Interview (CIDI)                                                                                                                              | Past Month Anxiety Disorder or Depressive Disorder Determined by DSM-IV Criteria |
| Kisely 2022  | Australia                            | Prospective Cohort   | 1981-2011 | Both   | 30-30     | N/A           | 1689              | Lifetime             | Self-reported; Administrative records | Child Trauma Questionnaire (CTQ); Administrative Records | 0-15            | Any                        | Suicide And Self-Harm                 | self-report               | Study-Specific Questionnaire (participants asked if they had ever hurt themselves on purpose in any way such as by taking an overdose of pills)                                  | Past Year Self Harm                                                              |
| Laporte 2001 | Canada                               | Case-Control         | 1996-1996 | Female | N/A       | 23.5(7)       | 68                | Lifetime             | Self-reported                         | Study-Specific Questionnaire                             | 0-16            | Family Member or Caregiver | Anorexia Nervosa                      | physician diagnosis       | Eating Attitudes Test (EAT)                                                                                                                                                      | Diagnosis of Anorexia Nervosa                                                    |
| Mall 2020    | South Africa                         | Case-Control         | 2013-2018 | Both   | 21-54     | 36.1(9.13)    | 2,097             | Lifetime             | Self-reported                         | Childhood Trauma Questionnaire (CTQ)                     | 0-18            | Any                        | Schizophrenic And Psychotic Disorders | physician diagnosis       | Structured Clinical Interview for Diagnosis for Axis I Disorders (SCID-I)                                                                                                        | Schizophrenic Disorders Determined by DSM-IV Criteria                            |
| Maman 2002   | United Republic Of Tanzania          | Prospective Cohort   | 1999      | Female | 18-99     | N/A           | 245               | Lifetime             | Self-reported                         | Study-Specific Questionnaire                             | 0-12            | Any                        | Human Immunodeficiency Virus (HIV)    | biomarker                 | HIV serostatus confirmed by blood / biomarker test                                                                                                                               | HIV Positive Serostatus                                                          |

**Table S8: Summary characteristic of studies analyzed for childhood sexual abuse and 15 identified health outcomes.**

| Study         | Location Name            | Study Design         | Years     | Sex    | Age Range | Mean Age (SD) | Total Sample Size | Exposure Recall Type | Exposure Assessment Method | Exposure Assessment Instrument                                  | Age of Exposure | Perpetrator | Outcome                                          | Outcome Assessment Method                                                 | Outcome Assessment Instrument                                                                                                                            | Outcome Definition                                                      |
|---------------|--------------------------|----------------------|-----------|--------|-----------|---------------|-------------------|----------------------|----------------------------|-----------------------------------------------------------------|-----------------|-------------|--------------------------------------------------|---------------------------------------------------------------------------|----------------------------------------------------------------------------------------------------------------------------------------------------------|-------------------------------------------------------------------------|
| Mansueto 2022 | Italy (Toscana)          | Case-Control         | 2020-2020 | Female | N/A       | 43.07(10.9)   | 132               | Lifetime             | Self-reported              | Childhood Experience of Care and Abuse Questionnaire (CECAQ)    | 0-15            | Any         | Schizophrenic And Psychotic Disorders            | administrative medical records or disease registries; physician diagnosis | Composite International Diagnostic Interview (CIDI)                                                                                                      | Psychotic Disorders Determined by WHO Criteria                          |
| Mimiaga 2009  | Multiple Locations       | Prospective Cohort   | N/A       | Male   | 18-99     | N/A           | 4,066             | Lifetime             | Self-reported              | Study-Specific Questionnaire                                    | 0-17            | Any         | Human Immunodeficiency Virus (HIV)               | biomarker                                                                 | HIV serostatus confirmed by blood / biomarker test                                                                                                       | HIV Positive Serostatus                                                 |
| Monnat 2015   | United States of America | Retrospective Cohort | 2009-2012 | Both   | N/A       | 43.9(12.55)   | 52,250            | Lifetime             | Self-reported              | ACE Questionnaire                                               | 0-18            | Any         | Cardiovascular Diseases (CCD); Diabetes (Type 2) | self-report                                                               | Self-reported ever being told by a doctor, nurse, or other health care professional that respondent had diabetes, heart attack, or myocardial infarction | Lifetime Diagnosis of Heart Attack or Myocardial Infarction or Diabetes |
| Mullen 1996   | New Zealand              | Retrospective Cohort | 1989-1990 | Female | 18-65     | N/A           | 497               | Lifetime             | Self-reported              | Parental Bonding Instrument (PBI); Study-Specific Questionnaire | 0-16            | Any         | Suicide And Self-Harm                            | self-report                                                               | Present State Examination (PSE)                                                                                                                          | Suicide Attempt At Ages >=18                                            |
| Mullen 1996   | New Zealand              | Retrospective Cohort | 1989-1990 | Female | 18-65     | N/A           | 497               | Lifetime             | Self-reported              | Parental Bonding Instrument (PBI); Study-Specific Questionnaire | 0-16            | Any         | Depressive Disorders                             | self-report                                                               | Present State Examination (PSE)                                                                                                                          | Depression at Age >=18 Determined by Study Specific Criteria            |

**Table S8: Summary characteristic of studies analyzed for childhood sexual abuse and 15 identified health outcomes.**

| Study          | Location Name          | Study Design         | Years        | Sex           | Age Range | Mean Age (SD) | Total Sample Size | Exposure Recall Type | Exposure Assessment Method            | Exposure Assessment Instrument   | Age of Exposure | Perpetrator | Outcome                                                                                    | Outcome Assessment Method                            | Outcome Assessment Instrument                                                                                 | Outcome Definition                                                                                                                        |
|----------------|------------------------|----------------------|--------------|---------------|-----------|---------------|-------------------|----------------------|---------------------------------------|----------------------------------|-----------------|-------------|--------------------------------------------------------------------------------------------|------------------------------------------------------|---------------------------------------------------------------------------------------------------------------|-------------------------------------------------------------------------------------------------------------------------------------------|
| Murphy 2020    | Denmark                | Retrospective Cohort | 1996-2008    | Both          | N/A       | 24(0)         | 2,629             | Lifetime             | Self-reported; Administrative records | Study-Specific Questionnaire     | 0-12            | Any         | Schizophrenic And Psychotic Disorders                                                      | administrative medical records or disease registries | ICD-10 Diagnosis of Schizophrenia identified in Danish National Registry of Patients                          | Psychotic Disorders Determined by ICD-10 Criteria                                                                                         |
| Naicker 2022   | South Africa (Gauteng) | Prospective Cohort   | 1990-2020    | Female ; Male | 28-28     | N/A           | 752 (F); 682 (M)  | Lifetime             | Self-reported                         | Bt30 Questionnaire               | 0-18            | Any         | Human Immunodeficiency Virus (HIV)                                                         | biomarker                                            | HIV serostatus confirmed by blood / biomarker test                                                            | HIV Positive Serostatus                                                                                                                   |
| Najman 2022    | Australia              | Prospective Cohort   | 1981-2011    | Both          | 30-30     | N/A           | 2,474             | Lifetime             | Self-reported                         | Child Trauma Questionnaire (CTQ) | 0-16            | Any         | Alcohol Abuse or Dependence; Substance Abuse or Dependence                                 | self-report                                          | Composite International Diagnostic Interview (CIDI)                                                           | Alcohol or Substance Abuse or Dependence Determined by the CIDI criteria                                                                  |
| Nelson 2002    | Australia              | Retrospective Cohort | 1996-2000    | Both          | N/A       | 29.9(2.5)     | 283               | Lifetime             | Self-reported                         | Study-Specific Questionnaire     | 0-18            | Any         | Suicide And Self-Harm; Alcohol abuse or dependence; Conduct disorder; Depressive disorders | self-report                                          | Semi-Structured Assessment for the Genetics of Alcoholism (SSAGA)                                             | Lifetime Experience of Suicide Attempt; Alcohol dependence, Conduct Disorder, and Major Depressive Disorder determined by DSM-IV criteria |
| Nelson 2006    | Australia              | Case-Cohort          | 1996-2000    | Both          | N/A       | 29.9(2.5)     | 6,050             | Lifetime             | Self-reported                         | Study-Specific Questionnaire     | 0-17            | Any         | Substance Abuse or Dependence                                                              | self-report                                          | Semi-Structured Assessment for the Genetics of Alcoholism (SSAGA)                                             | Lifetime Substance Use Determined by DSM-IV Criteria                                                                                      |
| Paraventi 2011 | Brazil (Sao Paulo)     | Case-Control         | Not reported | Female        | 18+       | N/A           | 120               | Lifetime             | Self-reported                         | Study-Specific Questionnaire     | 0-16            | Any         | Anorexia Nervosa; Bulimia Nervosa                                                          | physician diagnosis                                  | Clinical diagnosis of Anorexia Nervosa or Bulimia Nervosa based on DSM-IV criteria during psychiatric service | Clinical diagnosis of Anorexia Nervosa or Bulimia Nervosa                                                                                 |

**Table S8: Summary characteristic of studies analyzed for childhood sexual abuse and 15 identified health outcomes.**

| Study          | Location Name            | Study Design         | Years     | Sex  | Age Range | Mean Age (SD) | Total Sample Size | Exposure Recall Type | Exposure Assessment Method | Exposure Assessment Instrument                                 | Age of Exposure | Perpetrator | Outcome               | Outcome Assessment Method                                         | Outcome Assessment Instrument                                                 | Outcome Definition                                  |
|----------------|--------------------------|----------------------|-----------|------|-----------|---------------|-------------------|----------------------|----------------------------|----------------------------------------------------------------|-----------------|-------------|-----------------------|-------------------------------------------------------------------|-------------------------------------------------------------------------------|-----------------------------------------------------|
| Rajapakse 2020 | Sri Lanka                | Case-Control         | 2018-2019 | Both | 18-99     | N/A           | 686               | Lifetime             | Self-reported              | WHO Childhood Experiences International Questionnaire (ACE-IQ) | 0-18            | Any         | Suicide And Self-Harm | self-report; administrative medical records or disease registries | Hospital Administrative Records                                               | Suicide Attempt Determined with Hospital Admittance |
| Raposo 2014    | United States of America | Prospective Cohort   | 2001-2005 | Both | 65-99     | N/A           | 7,177             | Lifetime             | Self-reported              | Childhood Trauma Questionnaire (CTQ)                           | 0-18            | Any         | Anxiety Disorders     | self-report                                                       | Alcohol Use Disorder and Associated Disabilities Interview Schedule (AUDADIS) | Past Year Anxiety Disorders                         |
| Ratner 2003    | Canada                   | Retrospective Cohort | 1998-2000 | Male | 19-35     | 28.6(3.6)     | 351               | Lifetime             | Self-reported              | Study-Specific Questionnaire                                   | 0-14            | Any         | Depressive Disorders  | self-report                                                       | Center for Epidemiologic Studies Depression Scale (CES-D)                     | Depression Determined By CES-D Criteria             |

**Table S8: Summary characteristic of studies analyzed for childhood sexual abuse and 15 identified health outcomes.**

| Study             | Location Name            | Study Design         | Years     | Sex    | Age Range | Mean Age (SD) | Total Sample Size | Exposure Recall Type | Exposure Assessment Method | Exposure Assessment Instrument | Age of Exposure | Perpetrator | Outcome                                                               | Outcome Assessment Method | Outcome Assessment Instrument                                                                                                                                                                                                                                                                                                                      | Outcome Definition                                                                                                           |
|-------------------|--------------------------|----------------------|-----------|--------|-----------|---------------|-------------------|----------------------|----------------------------|--------------------------------|-----------------|-------------|-----------------------------------------------------------------------|---------------------------|----------------------------------------------------------------------------------------------------------------------------------------------------------------------------------------------------------------------------------------------------------------------------------------------------------------------------------------------------|------------------------------------------------------------------------------------------------------------------------------|
| Rich-Edwards 2010 | United States of America | Prospective Cohort   | 1989-2005 | Female | 25-44     | N/A           | 67,391            | Lifetime             | Self-reported              | Study-Specific Questionnaire   | 0-17            | Any         | Diabetes (Type 2)                                                     | self-report               | Study-Specific Questionnaire (participants who reported a diabetes diagnosis during mailed questionnaire were sent supplemental questionnaires to report further details on diagnostic tests, symptoms and therapy, which were then used to classify cases according to National Diabetes Data Group and American Diabetes Association guidelines) | Diagnosis of Diabetes as an Adult (>=18 Years)                                                                               |
| Roustit 2009      | France                   | Retrospective Cohort | 2005-2005 | Both   | 18-99     | N/A           | 3,023             | Lifetime             | Self-reported              | Study-Specific Questionnaire   | 0-18            | Any         | Suicide And Self-Harm; Alcohol Use or Dependence; Depressive Disorder | self-report               | Study-Specific Questionnaire defining suicide as at least one act committed with the intention of taking one's life since age 18; CAGE Questionnaire; Mini-International Neuropsychiatric Interview (MINI)                                                                                                                                         | Suicide Attempt at Ages >=18; Alcohol Dependence Determined by Score 2+ on CAGE Questionnaire; Depression Determined by MINI |

**Table S8: Summary characteristic of studies analyzed for childhood sexual abuse and 15 identified health outcomes.**

| Study        | Location Name                       | Study Design         | Years     | Sex    | Age Range | Mean Age (SD) | Total Sample Size | Exposure Recall Type | Exposure Assessment Method | Exposure Assessment Instrument                                                               | Age of Exposure | Perpetrator                     | Outcome                           | Outcome Assessment Method        | Outcome Assessment Instrument                                                                                           | Outcome Definition                                                        |
|--------------|-------------------------------------|----------------------|-----------|--------|-----------|---------------|-------------------|----------------------|----------------------------|----------------------------------------------------------------------------------------------|-----------------|---------------------------------|-----------------------------------|----------------------------------|-------------------------------------------------------------------------------------------------------------------------|---------------------------------------------------------------------------|
| Sanci 2008   | Australia                           | Prospective Cohort   | 1992-2003 | Female | N/A       | 14.91(0.39)   | 999               | Lifetime             | Self-reported              | Study-Specific Questionnaire                                                                 | 0-16            | Adult Or Older Person           | Anorexia Nervosa; Bulimia Nervosa | self-report                      | Branched Eating Disorder Test (BET)                                                                                     | Anorexia Nervosa or Bulimia Nervosa Determined by Study-Specific Criteria |
| Sartor 2007  | United States of America (Missouri) | Prospective Cohort   | 1995      | Female | 18-29     | N/A           | 3,536             | Lifetime             | Self-reported              | traumatic events and early childhood experiences modules; early childhood experiences module | 0-16            | Any; Family Member or Caregiver | Alcohol Abuse or Dependence       | self-report                      | Semi-Structured Assessment for the Genetics of Alcoholism (SSAGA)                                                       | Alcohol Dependence Determined by DSM-IV Criteria                          |
| Seid 2022    | Australia                           | Prospective Cohort   | 1996-2016 | Female | 45-99     | N/A           | 5,656             | Lifetime             | Self-reported              | Study-Specific Questionnaire                                                                 | 0-18            | Any                             | Diabetes (Type 2)                 | self-report; physician diagnosis | Self-reported receiving a diagnosis of diabetes by a doctor or being treated for diabetes (included type I and type II) | Diagnosis of Diabetes in the Past 3 Years                                 |
| Shields 2016 | Canada                              | Retrospective Cohort | 2012-2012 | Both   | 18+       | N/A           | 21,878            | Lifetime             | Self-reported              | Childhood Experiences of Violence Questionnaire (CEVQ); General Social Survey                | 0-16            | Any                             | Diabetes (Type 2)                 | self-report                      | Self-reported diagnosed with diabetes by a health professional (did not differentiate between type I and type II)       | Diagnosis of Diabetes as an Adult (>=18 Years)                            |
| Su 2022      | Canada                              | Prospective Cohort   | 2007-2018 | Both   | N/A       | 50.6(13.8)    | 1,351             | Lifetime             | Self-reported              | Childhood Trauma Questionnaire (CTQ)                                                         | 0-18            | Any                             | Depressive Disorders              | self-report                      | Composite International Diagnostic Interview (CIDI)                                                                     | Major Depressive Disorder Determined by DSM-IV and ICD-10 Criteria        |

**Table S8: Summary characteristic of studies analyzed for childhood sexual abuse and 15 identified health outcomes.**

| Study        | Location Name            | Study Design                                     | Years     | Sex           | Age Range | Mean Age (SD) | Total Sample Size | Exposure Recall Type | Exposure Assessment Method            | Exposure Assessment Instrument                                    | Age of Exposure | Perpetrator                | Outcome                           | Outcome Assessment Method      | Outcome Assessment Instrument                                                                                                                                     | Outcome Definition                                                             |
|--------------|--------------------------|--------------------------------------------------|-----------|---------------|-----------|---------------|-------------------|----------------------|---------------------------------------|-------------------------------------------------------------------|-----------------|----------------------------|-----------------------------------|--------------------------------|-------------------------------------------------------------------------------------------------------------------------------------------------------------------|--------------------------------------------------------------------------------|
| Sweet 2013   | United States of America | Prospective Cohort                               | 2001-2005 | Female ; Male | 20+       | N/A           | 608,088           | Lifetime             | Self-reported                         | [study specific questionnaire ]                                   | 0-18            | Any                        | Substance Abuse or Dependence     | self-report                    | National Epidemiologic Survey on Alcohol and Related Conditions (NESARC) Survey                                                                                   | Substance Use or Dependence Determined by NESARC Criteria                      |
| Taft 2019    | Australia                | Prospective Cohort                               | 1996-2009 | Female        | 18-36     | N/A           | 9,021             | Lifetime             | Self-reported                         | Study-Specific Questionnaire                                      | 0-18            | Any                        | Maternal Abortion and Miscarriage | self-report                    | Australian Longitudinal Study on Women’s Health Study Questionnaire (asks participants how many times they have experience stillbirth, miscarriage, and abortion) | Abortion For Reason Other Than Medical Abnormality                             |
| Talmon 2021  | United States of America | Prospective And Retrospective (Different Models) | 1967      | Both          | 32-49     | 41.2(3.54)    | 493               | Lifetime             | Self-reported; Administrative records | Administrative Records                                            | 0-12            | Any                        | Anorexia Nervosa; Bulimia Nervosa | physician diagnosis            | Diagnostic Interview Schedule (DIS)                                                                                                                               | Diagnosis of Anorexia Nervosa or Bulimia Nervosa Determined by DSM-IV Criteria |
| Tanaka 2015  | Canada                   | Prospective Cohort                               | 1983-2001 | Female ; Male | 21-35     | N/A           | 969 (F); 924 (M)  | Lifetime             | Self-reported                         | Childhood Experiences of Violence Questionnaire (CEVQ) Short Form | 0-16            | Any                        | Substance Abuse or Dependence     | self-report                    | Alcohol Use Disorders Identification Test (AUDIT)                                                                                                                 | Past Month Illicit Drug Use                                                    |
| Tenhave 2019 | Netherlands              | Prospective Cohort                               | 1996-2009 | Both          | 18-64     | N/A           | 9,304             | Lifetime             | Self-reported                         | Study-Specific Questionnaire                                      | 0-16            | Any                        | Anxiety Disorders                 | self-report                    | Composite International Diagnostic Interview (CIDI)                                                                                                               | Anxiety Disorders Determined by DSM-IV Criteria                                |
| Thomas 2008  | Multiple Locations       | Prospective Cohort                               | 1958-2003 | Both          | 45-45     | N/A           | 9,310             | Lifetime             | Self-reported                         | Study-Specific Questionnaire                                      | 0-16            | Family Member or Caregiver | Diabetes (Type 2)                 | physician diagnosis; biomarker | Biomarker                                                                                                                                                         | HbA1c ≥6.5%                                                                    |



**Table S8: Summary characteristic of studies analyzed for childhood sexual abuse and 15 identified health outcomes.**

| Study          | Location Name            | Study Design         | Years     | Sex    | Age Range | Mean Age (SD) | Total Sample Size | Exposure Recall Type | Exposure Assessment Method | Exposure Assessment Instrument | Age of Exposure | Perpetrator               | Outcome                              | Outcome Assessment Method | Outcome Assessment Instrument                                                                                                                                                 | Outcome Definition                                                             |
|----------------|--------------------------|----------------------|-----------|--------|-----------|---------------|-------------------|----------------------|----------------------------|--------------------------------|-----------------|---------------------------|--------------------------------------|---------------------------|-------------------------------------------------------------------------------------------------------------------------------------------------------------------------------|--------------------------------------------------------------------------------|
| Thompson 2019  | United States Of America | Prospective Cohort   | 1995-2008 | Both   | N/A       | 15.03(0.11)   | 9,421             | Lifetime             | Self-reported              | Study-Specific Questionnaire   | 0-18            | Parent Or Adult Caregiver | Suicide And Self-Harm                | self-report               | Study-Specific Questionnaire ("During the past 12 months, how many times did you actually attempt suicide?")                                                                  | Past Year Experience of one or more Suicide Attempts                           |
| Tonmyr 2017    | Canada                   | Retrospective Cohort | 2004-2005 | Both   | 18-76     | N/A           | 14,063            | Lifetime             | Self-reported              | Study-Specific Questionnaire   | 0-16            | Any                       | Substance Abuse or Dependence        | self-report               | Composite International Diagnostic Interview Use (CIDI)                                                                                                                       | Past Year Illicit Drug Use                                                     |
| van Roode 2009 | New Zealand              | Prospective Cohort   | 1973-2009 | Female | 18-32     | N/A           | 465               | Lifetime             | Self-reported              | Study-Specific Questionnaire   | 0-16            | Any                       | Maternal Abortion and Miscarriage    | self-report; biomarker    | Study-Specific Questionnaire with questions on sexual and reproductive health, based on British National Study of Sexual Attitudes and Lifestyles (asked number of abortions) | Lifetime Experience of Abortion/Miscarriage                                    |
| Widom 1999     | United States of America | Prospective Cohort   | 1989-1995 | N/A    | N/A       | 28.72(3.84)   | 1,196             | Lifetime             | Administrative records     | Administrative Records         | 0-11            | Any                       | Posttraumatic Stress Disorder (PTSD) | self-report               | Diagnostic Interview Schedule (DIS)                                                                                                                                           | Past Year PTSD Determined by DSM-III Criteria                                  |
| Widom 2007     | United States of America | Prospective Cohort   | 1989-1995 | Both   | N/A       | 28.7(3.8)     | 1,292             | Lifetime             | Administrative records     | Administrative Records         | 0-12            | Anyone Or Not Specified   | Depressive Disorders                 | self-report; interview    | Diagnostic Interview Schedule (DIS)                                                                                                                                           | Lifetime and Past Year Major Depressive Disorder Determined by DSM-IV Criteria |
| Widom 2012     | United States of America | Prospective Cohort   | 1967-2005 | Both   | 32-49     | N/A           | 807               | Lifetime             | Administrative records     | Administrative Records         | 0-12            | Any                       | Human Immunodeficiency Virus (HIV)   | biomarker                 | HIV serostatus confirmed by blood / biomarker test                                                                                                                            | HIV Positive Serostatus                                                        |

**Table S8: Summary characteristic of studies analyzed for childhood sexual abuse and 15 identified health outcomes.**

| Study            | Location Name                            | Study Design         | Years     | Sex    | Age Range | Mean Age (SD) | Total Sample Size | Exposure Recall Type | Exposure Assessment Method | Exposure Assessment Instrument | Age of Exposure | Perpetrator | Outcome                                                                                         | Outcome Assessment Method        | Outcome Assessment Instrument                                                                                                                                                     | Outcome Definition                                                                                             |
|------------------|------------------------------------------|----------------------|-----------|--------|-----------|---------------|-------------------|----------------------|----------------------------|--------------------------------|-----------------|-------------|-------------------------------------------------------------------------------------------------|----------------------------------|-----------------------------------------------------------------------------------------------------------------------------------------------------------------------------------|----------------------------------------------------------------------------------------------------------------|
| Wilson 2009      | United States of America                 | Prospective Cohort   | 1967-2004 | Both   | 32-49     | N/A           | 670               | Lifetime             | Administrative records     | Administrative Records         | 0-11            | N/A         | Sexually Transmitted Infection (STI)                                                            | self-report                      | Self-reported having been told by doctor or other health care professional that they had genital herpes, syphilis, genital warts or human papillomavirus, gonorrhea, or chlamydia | Self-reported history of diagnosis with an STI                                                                 |
| Wise 2001        | United States of America (Massachusetts) | Case-Control         | 1999-2001 | Female | 36-45     | N/A           | 366               | Lifetime             | Self-reported              | Conflict Tactics Scale (CTS)   | 0-18            | Any         | Depressive Disorders                                                                            | self-report; physician diagnosis | Structured Clinical Interview For DSM-III-R (SCID)                                                                                                                                | Lifetime and Past Year Major Depressive Disorder Determined by SCID Criteria                                   |
| Wyatt 2002       | United States of America (California)    | Case-Control         | 1994-2005 | Female | 18-99     | N/A           | 457               | Lifetime             | Self-reported              | Study-Specific Questionnaire   | 0-18            | Any         | Human Immunodeficiency Virus (HIV)                                                              | biomarker                        | HIV serostatus confirmed by blood / biomarker test                                                                                                                                | HIV Positive Serostatus                                                                                        |
| Xavier Hall 2021 | United States of America (Illinois)      | Retrospective Cohort | 2015-2019 | Both   | 16-29     | N/A           | 1,035             | Lifetime             | Self-reported              | Study-Specific Questionnaire   | 0-13            | Any         | Human Immunodeficiency Virus (HIV); Suicide and Self-Harm; Sexually Transmitted Infection (STI) | Self-report; biomarker           | HIV serostatus confirmed by blood / biomarker test; Composite International Diagnostic Interview (CIDI)                                                                           | HIV Positive Serostatus; Past 6 Months Experience of Suicide Attempt STI Status Determined by Clinical Testing |

**Table S8: Summary characteristic of studies analyzed for childhood sexual abuse and 15 identified health outcomes.**

| Study       | Location Name            | Study Design         | Years     | Sex    | Age Range | Mean Age (SD) | Total Sample Size | Exposure Recall Type | Exposure Assessment Method | Exposure Assessment Instrument       | Age of Exposure | Perpetrator | Outcome                                                                             | Outcome Assessment Method | Outcome Assessment Instrument                                                                                                                                                                                                            | Outcome Definition                                                                   |
|-------------|--------------------------|----------------------|-----------|--------|-----------|---------------|-------------------|----------------------|----------------------------|--------------------------------------|-----------------|-------------|-------------------------------------------------------------------------------------|---------------------------|------------------------------------------------------------------------------------------------------------------------------------------------------------------------------------------------------------------------------------------|--------------------------------------------------------------------------------------|
| Xiao 2022   | China (Yunnan)           | Case-Control         | 2018-2021 | Both   | N/A       | 13.47(1.71)   | 1,134             | Lifetime             | Self-reported              | Childhood Trauma Questionnaire (CTQ) | 0-15            | Any         | Depressive Disorders                                                                | physician diagnosis       | Clinical diagnosis of a depressive disorder by professional pediatric psychiatrists following DSM-V and using Kiddie Schedule for Affective Disorders and Schizophrenia for School-age Children-Present and Lifetime version (K-SADS-PL) | Depression Determined by DSM-V criteria                                              |
| Zinzow 2012 | United States of America | Retrospective Cohort | 2006-2006 | Female | 18-76     | 46.58(17.87)  | 3,001             | Lifetime             | Self-reported              | Study-Specific Questionnaire         | 0-14            | Any         | Posttraumatic Stress Disorder (PTSD); Drug use disorders, Major depressive disorder | self-report               | National Women's Study PTSD and Major Depressive Episode modules – structured interviews based on DSM-IV criteria                                                                                                                        | PTSD, MDD, drug abuse determined by structured interviews based upon DSM-IV Criteria |

## Section 1.5: Data selection and sensitivity analyses for childhood sexual abuse

### Childhood sexual abuse and alcohol use disorders

For CSA-alcohol use disorders, we extracted a total of 16 studies reporting on the association. Among these studies, two reported on the same association using the Australian Twin Register younger cohort. We retained Nelson 2002 for measuring AUDs among the entire sample rather than just among users of alcohol, as this approach was most consistent with our other input studies. Two studies also published on the same association using the Missouri Adolescent Female Twin Study; among these we retained Sartor 2007 because it measured CSA in a manner most consistent with our other input dataset while the other study focused on the difference between behavior vs. checklist-defined CSA and measured lifetime alcohol use disorder rather than the development of a disorder. Three studies reported on this association using the Mater Hospital – University of Queensland Study of Pregnancy; we retained estimates from Najman 2022 because this publication used self-reported CSA exposure ascertainment rather than agency records with the longest follow-up (30 years) and used a case definition matching AUDs. Lastly, four studies reported on this association using the national epidemiologic survey on alcohol and related conditions dataset. We retained estimates from Fenton 2013 for reporting the exposure/outcome case definitions most consistent with our study’s definitions and among the widest sample (other studies subset to female current drinkers only; those with data on sexuality only; or used alternate outcome definition measuring abuse and/or dependence).

These choices resulted in 10 remaining unique studies, among which four used an alternate case definition measuring alcohol abuse and/or dependence. The GBD reference definition for alcohol use disorders is alcohol dependence measured via DSM criteria. Alcohol abuse is an accepted alternate case definition used within the GBD, and the diagnostic criteria for substance abuse is similar but less extensive than for dependence. The principal difference between them is that the criteria for substance abuse focus on social and situational consequences of use and does not mention withdrawal or tolerance. Thus, in addition to a sensitivity analysis where we tested the impact of trimming 10% of outliers (Table S9), we tested restricting our input dataset to only those studies measuring alcohol dependence specifically. The results of this analysis were consistent with our main result, with a slightly increased ROS (0.195).

Table S9. Sensitivity analyses for childhood sexual abuse and alcohol use disorders.

| Analysis           | RR and 95%UI     | ROS    | Pub. Bias | Gamma    | No. of studies (no. observations) | Selected bias covariates                                                                    |
|--------------------|------------------|--------|-----------|----------|-----------------------------------|---------------------------------------------------------------------------------------------|
| <b>Main</b>        | 1.8 (1.39-2.33)  | 0.186  | 0         | 3.08E-08 | 10 (15)                           | Adjusted for confounding beyond age and sex; Study sample not geographically representative |
| <b>0% trimming</b> | 1.92 (0.56-6.56) | -0.191 | 0         | 0.168    | 10 (15)                           | Adjusted for confounding beyond age and sex; Study sample not                               |

|                                                                          |                  |       |   |          |       |                               |
|--------------------------------------------------------------------------|------------------|-------|---|----------|-------|-------------------------------|
|                                                                          |                  |       |   |          |       | geographically representative |
| <b>Exclude studies using outcome definitions including alcohol abuse</b> | 1.85 (1.42-2.41) | 0.195 | 0 | 1.74E-06 | 6 (7) | --                            |

### Childhood sexual abuse and self-harm

We extracted data from a total of 19 studies reporting on the risk of self-harm (suicide attempt) given exposure to CSA. Among these input studies, two authors reported results using National Longitudinal Study of Adolescent to Adult Health dataset. We retained estimates from Thompson 2019 as the reported effect sizes were adjusted for confounding compared to the bivariate (unadjusted) associations reported by the other authors. Additionally, two authors reported results using the Children in the Community Cohort Study and we retained reported estimates from Brown 1999 as they incorporated both CPS substantiations and retrospective self-reports to create their exposed group while the other study only used substantiated CSA allegations to ascertain exposure.

We undertook two sensitivity analyses. For the first, we tested the impact of trimming outliers on our results. Without 10% trimming, estimated between-study heterogeneity was higher ( $\gamma = 0.126$ ) and the ROS decreased (-0.0421). Study designs at risk of reverse causation (i.e., case-controls) were detected as a potential source of bias by our covariate selection algorithm. Consequently, for our second sensitivity analysis, we excluded case-controls and found an ROS of 0.244 (Table S10).

Table S10. Sensitivity analyses for childhood sexual abuse and self-harm.

| Analysis                                                                               | RR and 95%UI      | ROS     | Pub. Bias | Gamma   | No. of studies (no. observations) | Selected bias covariates                          |
|----------------------------------------------------------------------------------------|-------------------|---------|-----------|---------|-----------------------------------|---------------------------------------------------|
| <b>Main</b>                                                                            | 1.98 (1.25-3.12)  | 0.15    | 0         | 0.0148  | 16 (19)                           | Study at risk of reverse causation (case-control) |
| <b>0% trimming</b>                                                                     | 2.23 (0.776-6.41) | -0.0421 | 0         | 0.126   | 16 (19)                           | Study at risk of reverse causation (case-control) |
| <b>Exclude case-control designs and ever/lifetime suicide attempt case definitions</b> | 2.07 (1.56-2.77)  | 0.244   | 0         | 0.00211 | 14 (17)                           | Effect size uncontrolled for confounding          |

### Childhood sexual abuse and major depressive disorder

We extracted data from a total of 45 studies reporting on the risk of depressive disorders given exposure to CSA. Among these input studies, two authors reported results using the Children in the Community Cohort Study and we retained reported estimates from Brown 1999 as they incorporated both CPS substantiations and retrospective self-reports to create their exposed group while the other authors only used substantiated CSA allegations to ascertain exposure. Similarly, four authors reported on this association using the Mater Hospital – University of Queensland Study of Pregnancy. We retained estimates from Kisely 2021 because this study used self-reported CSA exposure and assessed current depression, rather than depression over the lifetime, providing the best assurance of temporality between CSA and adulthood outcome. Lastly, two studies reported estimates from the Netherlands Study of Depression and Anxiety; we retained estimates from Hovens 2015 for using a prospective cohort design rather than a retrospective cohort design.

We additionally excluded one originally extracted study for using an unaccepted symptom scale to measure depression (CIDI-SF scale). After making these data selections, we confirmed all studies used self-reported exposure to CSA and used diagnostic scales and/or symptom scales to measure depressive disorders among the sample (i.e., no outcomes were ascertained via health system records or self-reported physician diagnoses).

We undertook two sensitivity analyses for CSA-MDD. First, we tested the impact of trimming. Without 10% trimming, the ROS slightly decreased but association remained two-star (Table S11). Next, we excluded case-control study designs (cohort studies only); the result was consistent with our main result (Table S11).

Four studies reported sex-stratified effect sizes. Across these studies, sex-specific effects were not observed to significantly differ among men compared to women; however, there were several studies which reported results for samples made up entirely of women. This potential source of compositional bias was accounted for by incorporating a study-level covariate indicating whether a sample represented a single gender population (i.e., women only or men only). This covariate was not detected as significant by our selection algorithm, suggesting that the inclusion of women-only samples was not a source of substantial bias in our main result.

Table S11. Sensitivity analyses for childhood sexual abuse and major depressive disorder.

| Analysis           | RR and 95%UI     | ROS     | Pub. Bias | Gamma  | No. of studies (no. observations) | Selected bias covariates                                               |
|--------------------|------------------|---------|-----------|--------|-----------------------------------|------------------------------------------------------------------------|
| <b>Main</b>        | 1.66 (1.13-2.44) | 0.0906  | 0         | 0.0137 | 26 (32)                           | --                                                                     |
| <b>0% trimming</b> | 1.89 (0.89-4.01) | 0.00206 | 0         | 0.0726 | 26 (32)                           | Women only samples; exposure defined as CSA before an age less than 15 |

|                                     |                  |       |   |        |         |    |
|-------------------------------------|------------------|-------|---|--------|---------|----|
| <b>Exclude case-control designs</b> | 1.68 (1.16-2.42) | 0.104 | 0 | 0.0116 | 20 (25) | -- |
|-------------------------------------|------------------|-------|---|--------|---------|----|

### Childhood sexual abuse and anxiety disorders

We extracted data from a total of 20 studies reporting on the risk of anxiety disorders given exposure to CSA. Among these input studies, four authors reported on this association using the Mater Hospital – University of Queensland Study of Pregnancy. We retained estimates from Kisely 2021 because this study used self-reported CSA exposure and assessed current depression, rather than depression over the lifetime, providing the best assurance of temporality between CSA and adulthood outcome. Lastly, two studies reported estimates from the Netherlands Study of Depression and Anxiety; we retained estimates from Hovens 2015 for using a prospective cohort design rather than a retrospective cohort design.

After making these data selections (n = 12 studies), 11 studies used self-reported exposure to CSA and one used administratively ascertained exposure (i.e., child protection agency records). All studies used diagnostic scales and/or symptom scales to measure depressive disorders among the sample (i.e., no outcomes were ascertained via health system records or self-reported physician diagnoses).

We undertook four sensitivity analyses for CSA-anxiety disorders. First, we tested the impact of trimming. Without 10% trimming, estimated between-study heterogeneity increased and the ROS became negative (Table S12). Next, we excluded case-control study designs (cohort studies only); the result was consistent with our main result (Table S12). Thirdly, we excluded the single study using administrative sources to ascertain CSA exposure. When doing so, the ROS was slightly lower (0.0682). Finally, we excluded four studies measuring specific anxiety disorders rather than any anxiety disorder in aggregate and found an ROS of 0.0638.

Table S12. Sensitivity analyses for childhood sexual abuse and anxiety disorders.

| <b>Analysis</b>                     | <b>RR and 95%UI</b>  | <b>ROS</b> | <b>Pub. Bias</b> | <b>Gamma</b> | <b>No. of studies (no. observations)</b> | <b>Selected bias covariates</b>                                                     |
|-------------------------------------|----------------------|------------|------------------|--------------|------------------------------------------|-------------------------------------------------------------------------------------|
| <b>Main</b>                         | 1.44<br>(1.13-1.85)  | 0.0794     | 0                | 4.94E-10     | 12 (13)                                  | Component outcome definition; CSA measured before an age less than 15 (i.e. 11-14)  |
| <b>0% trimming</b>                  | 1.75<br>(0.656-4.66) | -0.132     | 0                | 0.101        | 12 (13)                                  | Component outcome definition; CSA measured before an age less than 15 (i.e. 11-14)  |
| <b>Exclude case-control designs</b> | 1.44<br>(1.13-1.85)  | 0.0796     | 0                | 1.26E-08     | 11 (12)                                  | CSA measured before an age less than 15; CSA measured before an age greater than 15 |

|                                                                           |                    |        |   |          |         |                                        |
|---------------------------------------------------------------------------|--------------------|--------|---|----------|---------|----------------------------------------|
| <b>Exclude studies using administrative sources to ascertain exposure</b> | 1.41<br>(1.1-1.81) | 0.0682 | 0 | 1.74E-09 | 11 (12) | Women only sample; selection bias risk |
| <b>Exclude studies using component outcome (e.g., PTSD only)</b>          | 1.4<br>(1.09-1.8)  | 0.0638 | 0 | 1.12E-06 | 8 (9)   | --                                     |

Childhood sexual abuse and drug use disorders

We extracted data from a total of 30 studies reporting on the association between CSA and drug use disorders. Among the originally identified and accepted studies, several authors reported on this association using the Mater-University of Queensland Study of Pregnancy (MUSP) cohort. From these studies, we chose to use the estimates from Najman 2022 because this analysis used self-reported CSA to create the exposed group and measured any drug use disorder rather than a specific type of substance use disorder (eg, amphetamine use disorder, cannabis use disorder). This definition was more consistent with the remainder of our input studies. In addition, several authors reported on the association between CSA and drug use outcomes using the National Epidemiological Survey of Alcohol and Related Conditions (NESARC); we retained the estimates from Sweet 2013 because they measured drug use disorders rather than illicit drug use (without a diagnosis of dependence). Lastly, three authors measured drug use outcomes using the National Longitudinal Study of Adolescent to Adult Health – we retained estimates from Huang 2011 for including all illicit drug use rather than measuring specific substances (other authors measured prescription opioid misuse; cocaine use, marijuana use). These selections resulted in 16 studies used for modeling.

Across the identified studies, there was insufficient evidence to investigate the relationship between CSA and specific drug use disorders (e.g., cannabis use disorder, amphetamine use disorder, opioid use disorder, etc.). In the future as more data becomes available, we plan to undertake analyses illuminating the specific relationships between CSA and each of these outcomes. For our analyses, we instead investigated the association between CSA and any drug use disorder. We accepted author definitions measuring presence of any drug use disorders according to DSM criteria (reference), illicit drug use (accepted alternate), and measuring presence of specific drug use disorders (accepted alternate). Accepted alternate definitions were marked with study-level bias covariates. In our main analyses, the bias covariate detection algorithm suggested that measuring specific drug use disorders (Duncan 2008, cannabis use disorders; Conroy 2009, opioid use disorders) may be a significant source of difference among included studies. In addition to our standard sensitivity analysis run without trimming, we therefore also undertook sensitivity analyses in which we subset the data to: (1) studies measuring aggregate drug use/use disorders only; (2) studies measuring use disorders only (i.e., excluding those measuring use); and (3) studies measuring aggregate drug use disorders only (i.e., combining the two exclusion reasons from analyses 1-2). Across all analyses, our results suggest a significant degree of between study heterogeneity (range of  $\gamma = 0.123$  to  $0.258$ ; Table S13). This result is likely driven by the heterogenous nature of studies and/or outcome definitions included in the input data set; greater



consistency in outcome measurement can improve our ability to understand the relationship between CSA and drug use disorders moving forward.

Table S13. Sensitivity analyses for childhood sexual abuse and drug use disorders.

| Analysis                                                                                            | RR and 95%UI         | ROS     | Pub. Bias | Gamma | No. of studies (no. observations) | Selected bias covariates                                                                                                                        |
|-----------------------------------------------------------------------------------------------------|----------------------|---------|-----------|-------|-----------------------------------|-------------------------------------------------------------------------------------------------------------------------------------------------|
| <b>Main</b>                                                                                         | 1.95<br>(0.709-5.38) | -0.0908 | 0         | 0.123 | 16 (34)                           | Sample represents a subpopulation, effect size not controlled for age and sex plus additional confounders, study measured specific use disorder |
| <b>0% trimming</b>                                                                                  | 2.06<br>(0.507-8.34) | -0.227  | 0         | 0.258 | 16 (34)                           | Sample represents a subpopulation, effect size not controlled for age and sex plus additional confounders, study measured specific use disorder |
| <b>Exclude studies measuring specific drug use disorders</b>                                        | 2.36<br>(0.638-8.74) | -0.12   | 0         | 0.196 | 13 (26)                           | Study measuring use without disorder criteria                                                                                                   |
| <b>Exclude studies measuring drug use without disorder criteria</b>                                 | 2.55<br>(0.612-10.7) | -0.131  | 0         | 0.222 | 10 (22)                           | Study measuring specific drug use disorder                                                                                                      |
| <b>Exclude studies measuring either specific use disorder or drug use without disorder criteria</b> | 2.96<br>(0.675-13)   | -0.078  | 0         | 0.213 | 8 (19)                            | --                                                                                                                                              |

## Section 1.6: Supplementary results for childhood sexual abuse selected outcomes

### Type 2 diabetes mellitus

We extracted 13 observations from seven studies (seven cohorts) reporting on the association between CSA and type 2 diabetes mellitus across four locations (Supplementary Table 8). Based on our conservative BPRF analyses, we estimated an ROS of -0.01, indicating weak evidence of an association.

In a sensitivity analysis run without 10% trimming, the ROS was 0.0007, corresponding to a two-star association under the BPRF framework.

#### HIV/AIDS

We extracted nine observations from seven studies (two case-controls and five cohorts) reporting on the association between CSA and HIV/AIDS across four locations (Supplementary Table 8). Based on our conservative BPRF analyses, we estimated an ROS of -0.04, indicating weak evidence of an association. There were fewer than 10 observations in our main analyses, thus we did not trim any outliers in this model.

#### Sexually transmitted infections excluding HIV

We extracted 11 observations from four studies (four cohorts) reporting on the association between CSA and sexually transmitted infections excluding HIV across two locations (Supplementary Table 8). Based on our conservative BPRF analyses, we estimated an ROS of -0.08, indicating weak evidence of an association. In a sensitivity analysis run without trimming 10% of outliers, the ROS was -0.0765.

#### Maternal abortion and miscarriage

We extracted eight observations from six studies (one case-control and five cohorts) reporting on the association between CSA and maternal abortion and miscarriage across five locations (Supplementary Table 8). Based on our conservative BPRF analyses, we estimated an ROS of -0.09, indicating weak evidence of an association. There were fewer than 10 observations in our main analyses, thus we did not trim any outliers in this model.

#### Conduct disorder

We extracted five observations from three studies (three cohorts) reporting on the association between CSA and conduct disorder across two locations (Supplementary Table 8). Based on our conservative BPRF analyses, we estimated an ROS of -0.23. There were fewer than 10 observations in our main analyses, thus we did not trim any outliers in this model.

#### Bulimia nervosa

We extracted seven observations from five studies (one case-control and four cohorts) reporting on the association between CSA and bulimia nervosa across four locations (Supplementary Table 8). Based on our conservative BPRF analyses, we estimated an ROS of -0.33, indicating weak evidence of an association. There were fewer than 10 observations in our main analyses, thus we did not trim any outliers in this model.

#### Schizophrenia

We extracted five observations from five studies (four case-control and one cohort) reporting on the association between CSA and schizophrenia across five locations (Supplementary Table 8). Based on our conservative BPRF analyses, we estimated an ROS of -0.46, indicating weak evidence of an association. There were fewer than 10 observations in our main analyses, thus we did not trim any outliers in this model.

## Section 1.7: Descriptive results for additional health-related outcomes studied in association with childhood sexual abuse exposure.

### High body mass index

We extracted 15 studies measuring an association between CSA and adult-onset BMI. Across these studies, three authors reported on this association using the National Longitudinal Study of Adolescent to Adult Health. We retained estimates from Fuemmeler 2009 as the exposure and outcome definitions most clearly aligned with indicators in the GBD (sexual abuse compared to no sexual abuse; overweight and overweight/obese compared to non-overweight). We also found that two authors reported on the CSA and high body mass index association using the Mater Hospital – University of Queensland Study of Pregnancy. We retained estimates from Kisely 2022 as they reported exposure and outcome definitions mostly closely aligned with our case definitions and followed participants for a longer period (30 vs. 21 years in alternate study). These selections resulted in 12 studies, across which outcome definitions corresponding to high BMI varied. Most studies reported on measure of obesity, defined as body mass index greater than or equal to 30 kg/m<sup>2</sup> while others reported on overweight, defined as body mass index 25 – 29 kg/m<sup>2</sup>. Extended data figure 9 shows the distribution of effect sizes, with color indicating which outcome definition the study used. In general, effect sizes tend to demonstrate a harmful effect of CSA on adult-onset obesity (Extended data figure 9); however, there is substantial heterogeneity in strength and significance of these estimates.

### Smoking

We extracted 10 studies which measured the risk of smoking in association with exposure to CSA. Three studies used the Mater-University of Queensland Study of Pregnancy, and we retained Najman 2022 as this study used the longest follow-up and self-reported exposure to CSA. In addition, two studies used the Nurses Health Study II. We retained estimates from Jun 2008 as the analysis approach was most consistent with other included studies (the alternate publication investigated the mediating effect of CSA on sexual orientation disparities in tobacco use). These selections resulted in seven studies. Case definitions for smoking varied across studies (Table S14). Four of the seven of the extracted and accepted studies showed a significantly harmful relationship between CSA and smoking (Extended data figure 9).

Table S14: Case definitions for smoking by study.

| Study                 | Outcome definition                                                                                                                                                                                                |
|-----------------------|-------------------------------------------------------------------------------------------------------------------------------------------------------------------------------------------------------------------|
| <b>Valerio 2022</b>   | Current smokers are those who used one or more cigarettes a day for at least one week in the last 30 days.                                                                                                        |
| <b>Najman 2022</b>    | Respondents self-reported current cigarette smoking at the 30-year follow-up.                                                                                                                                     |
| <b>Kalichman 2001</b> | self-reported tobacco use in the past 6 months.                                                                                                                                                                   |
| <b>Nichols 2004</b>   | Smoking status at study enrolment: participants who indicated on the study of moods and cycles baseline questionnaire that they had smoked more than 100 cigarettes in their lifetime were classified as smokers. |
| <b>Jun 2008</b>       | Self-reported smoking between ages 15 and 19 years.                                                                                                                                                               |
| <b>Anda 1999</b>      | Current smoking defined as smoking at the time of the survey.                                                                                                                                                     |
| <b>Tanaka 2015</b>    | Self-reported daily cigarette smoking.                                                                                                                                                                            |

## High systolic blood pressure

We identified five studies reporting on the association between CSA and a measure of high systolic blood pressure. Two studies reported this association using the same underlying cohort (National Longitudinal Study of Adolescent to Adult Health, Wave IV), and we chose to retain the study reporting a combined sex effect size (Gooding 2014) as this was most comparable with the other included studies. This selection resulted in four studies. The four included studies did not show consistent evidence of a significantly harmful effect (Extended data figure 9).

## Section 2: Data input details for each risk-outcome pair

For intimate partner violence included studies, we report the observations used for modeling by outcome in Table S15. The log transformed effect size and standard error are reported. Where relevant, the column “effect size details” describes differences between multiple included observations from a single study and corresponding to the same violence type. For non-mutually exclusive data points, the factor by which we adjusted the standard error is reported in the column, “SE adjustment factor.”

For childhood sexual abuse included studies, we report the observations used for modeling by outcome in Table S16. The log transformed effect size and standard error are reported. Where relevant, the column “effect size details” describes differences between multiple included observations from a single study and corresponding to the same group of participants. Across included studies, the most common reason for multiple observations were studies reporting effect sizes by frequency and/or severity of exposure. For non-mutually exclusive data points, the factor by which we adjusted the standard error is reported in the column, “SE adjustment factor.”

Table S15. Summary results of included intimate partner violence studies.

**Table S15. Summary results of included intimate partner violence studies**

| Author            | Health outcome    | IPV type                              | Effect size details           | SE adjustment factor | Log effect size | Standard error of the log effect size |
|-------------------|-------------------|---------------------------------------|-------------------------------|----------------------|-----------------|---------------------------------------|
| Ahmadabadi 2020   | Anxiety disorders | Severe combined (physical and sexual) |                               | N/A                  | 0.10            | 0.52                                  |
| Ahmadabadi 2020   | Anxiety disorders | Physical abuse                        |                               | N/A                  | 0.41            | 0.25                                  |
| Brown 2020        | Anxiety disorders | physical; sexual; psychological       |                               | N/A                  | 1.22            | 0.28                                  |
| Ehrensaft 2006    | Anxiety disorders | physical                              | Generalized Anxiety Disorder  | 2                    | 0.99            | 0.55                                  |
| Ehrensaft 2006    | Anxiety disorders | physical                              | Posttraumatic Stress Disorder | 2                    | 1.86            | 0.53                                  |
| Makaroun 2020     | Anxiety disorders | physical; sexual                      | Age strata: 60-99             | N/A                  | 0.47            | 0.61                                  |
| Makaroun 2020     | Anxiety disorders | physical; sexual                      | Age strata: 45-59             | N/A                  | 1.34            | 0.26                                  |
| Suglia 2011       | Anxiety disorders | physical; sexual                      |                               | N/A                  | 0.67            | 0.34                                  |
| Delong 2019       | HIV/AIDS          | physical; sexual                      |                               | N/A                  | 0.34            | 0.18                                  |
| Deyessa 2018      | HIV/AIDS          | physical                              |                               | N/A                  | 0.28            | 0.36                                  |
| Deyessa 2018      | HIV/AIDS          | sexual                                |                               | N/A                  | 0.39            | 0.40                                  |
| Fonck 2005        | HIV/AIDS          | physical                              |                               | N/A                  | 0.59            | 0.24                                  |
| Jewkes 2010       | HIV/AIDS          | physical; sexual                      |                               | N/A                  | 0.41            | 0.19                                  |
| Kouyoumdjian 2013 | HIV/AIDS          | sexual                                |                               | N/A                  | 0.46            | 0.18                                  |

**Table S15. Summary results of included intimate partner violence studies**

| Author             | Health outcome            | IPV type                              | Effect size details | SE adjustment factor | Log effect size | Standard error of the log effect size |
|--------------------|---------------------------|---------------------------------------|---------------------|----------------------|-----------------|---------------------------------------|
| Kouyoumdjian 2013  | HIV/AIDS                  | physical                              |                     | N/A                  | 0.48            | 0.17                                  |
| Maman 2002         | HIV/AIDS                  | physical                              |                     | N/A                  | 0.88            | 0.51                                  |
| Maman 2002         | HIV/AIDS                  | sexual                                |                     | N/A                  | 0.87            | 0.49                                  |
| Ahmadabadi 2020    | Major depressive disorder | Severe combined (physical and sexual) |                     | N/A                  | 0.64            | 0.47                                  |
| Ahmadabadi 2020    | Major depressive disorder | Physical abuse                        |                     | N/A                  | 0.26            | 0.27                                  |
| Ali 2009           | Major depressive disorder | Physical and psychological            |                     | N/A                  | 0.72            | 0.33                                  |
| Ali 2009           | Major depressive disorder | sexual                                |                     | N/A                  | 1.11            | 0.51                                  |
| Brown 2020         | Major depressive disorder | physical; sexual; psychological       |                     | N/A                  | 1.06            | 0.22                                  |
| Chowdhary 2008     | Major depressive disorder | physical                              |                     | N/A                  | -0.13           | 0.88                                  |
| Chowdhary 2008     | Major depressive disorder | sexual                                |                     | N/A                  | 0.11            | 1.45                                  |
| Ehrensaft 2006     | Major depressive disorder | physical                              |                     | N/A                  | 0.90            | 0.39                                  |
| Han 2019           | Major depressive disorder | physical                              |                     | N/A                  | 0.67            | 0.21                                  |
| Llosamartínez 2019 | Major depressive disorder | physical; sexual; psychological       |                     | N/A                  | 1.27            | 0.73                                  |
| Makaroun 2020      | Major depressive disorder | physical; sexual                      | Age strata: 60-99   | N/A                  | 0.83            | 0.59                                  |
| Makaroun 2020      | Major depressive disorder | physical; sexual                      | Age strata: 45-59   | N/A                  | 1.34            | 0.28                                  |

**Table S15. Summary results of included intimate partner violence studies**

| Author             | Health outcome                    | IPV type                        | Effect size details | SE adjustment factor | Log effect size | Standard error of the log effect size |
|--------------------|-----------------------------------|---------------------------------|---------------------|----------------------|-----------------|---------------------------------------|
| Ouellet-Morin 2015 | Major depressive disorder         | physical; sexual; psychological |                     | N/A                  | 0.48            | 0.22                                  |
| Pico-Alfonso 2006  | Major depressive disorder         | physical; psychological         |                     | N/A                  | 2.51            | 0.74                                  |
| Suglia 2011        | Major depressive disorder         | physical; sexual                |                     | N/A                  | 0.09            | 0.29                                  |
| Taft 2008          | Major depressive disorder         | physical; sexual                |                     | N/A                  | 0.72            | 0.09                                  |
| Abdollahi 2015     | Maternal abortion and miscarriage | physical                        |                     | N/A                  | 0.31            | 0.39                                  |
| Bourassa 2007      | Maternal abortion and miscarriage | physical; sexual                |                     | N/A                  | 1.41            | 0.36                                  |
| Catak 2016         | Maternal abortion and miscarriage | physical                        |                     | N/A                  | 0.69            | 0.27                                  |
| Ibrahim 2015       | Maternal abortion and miscarriage | physical                        |                     | N/A                  | 2.39            | 0.34                                  |
| Johri 2011         | Maternal abortion and miscarriage | physical; sexual                |                     | N/A                  | 0.52            | 0.21                                  |
| Leung 2002         | Maternal abortion and miscarriage | physical; sexual                |                     | N/A                  | 1.57            | 0.41                                  |
| Nelson 2003        | Maternal abortion and miscarriage | physical                        |                     | N/A                  | 0.12            | 0.11                                  |

**Table S15. Summary results of included intimate partner violence studies**

| Author         | Health outcome                    | IPV type                        | Effect size details                   | SE adjustment factor | Log effect size | Standard error of the log effect size |
|----------------|-----------------------------------|---------------------------------|---------------------------------------|----------------------|-----------------|---------------------------------------|
| Romito 2009    | Maternal abortion and miscarriage | physical; sexual                | Age strata: 30-99                     | N/A                  | 1.75            | 1.59                                  |
| Romito 2009    | Maternal abortion and miscarriage | physical; sexual                | Age strata: <30                       | N/A                  | -0.49           | 1.11                                  |
| Taft 2019      | Maternal abortion and miscarriage | physical; sexual; psychological | Exposure recall: more than 1 year ago | N/A                  | 0.52            | 0.18                                  |
| Taft 2019      | Maternal abortion and miscarriage | physical; sexual; psychological | Exposure recall: past year            | N/A                  | 0.85            | 0.25                                  |
| Ackard 2007    | Self-harm                         | physical; sexual                |                                       | N/A                  | 1.16            | 0.61                                  |
| Chowdhary 2008 | Self-harm                         | physical                        |                                       | N/A                  | 2.08            | 1.09                                  |
| Chowdhary 2008 | Self-harm                         | sexual                          |                                       | N/A                  | 2.39            | 1.22                                  |
| Kaslow 2000    | Self-harm                         | physical                        |                                       | N/A                  | -0.03           | 0.45                                  |
| Makaroun 2020  | Self-harm                         | physical; sexual                | Age strata: 45-59                     | N/A                  | 1.81            | 0.45                                  |
| Makaroun 2020  | Self-harm                         | physical; sexual; psychological | Age strata: 60-99                     | N/A                  | 0.18            | 0.98                                  |



Table S16. Summary results of included childhood sexual abuse studies.

**Table S16. Summary results of included childhood sexual abuse studies**

| Author         | Health outcome        | Sex                      | Effect size details               | SE adjustment factor | Log effect size | Standard error of the log effect size |
|----------------|-----------------------|--------------------------|-----------------------------------|----------------------|-----------------|---------------------------------------|
| Borges 2021    | Alcohol use disorders | Combined Male and Female |                                   | N/A                  | 0.18            | 0.21                                  |
| Cutajar 2010   | Alcohol use disorders | Male                     |                                   | N/A                  | 1.23            | 0.44                                  |
| Cutajar 2010   | Alcohol use disorders | Female                   |                                   | N/A                  | 2.19            | 0.43                                  |
| Dinwiddie 2000 | Alcohol use disorders | Male                     |                                   | N/A                  | 0.00            | 0.82                                  |
| Dinwiddie 2000 | Alcohol use disorders | Female                   |                                   | N/A                  | 0.92            | 0.48                                  |
| Fenton 2013    | Alcohol use disorders | Combined Male and Female |                                   | N/A                  | 0.58            | 0.07                                  |
| Fergusson 1996 | Alcohol use disorders | Combined Male and Female | Contact CSA excluding intercourse | N/A                  | 1.16            | 0.36                                  |
| Fergusson 1996 | Alcohol use disorders | Combined Male and Female | CSA Involving Intercourse         | N/A                  | 0.99            | 0.41                                  |
| Fergusson 1996 | Alcohol use disorders | Combined Male and Female | Non-Contact CSA                   | N/A                  | 0.64            | 0.50                                  |
| Kendler 2000   | Alcohol use disorders | Female                   |                                   | N/A                  | 1.09            | 0.32                                  |
| Najman 2022    | Alcohol use disorders | Combined Male and Female | Low severity CSA                  | N/A                  | 0.10            | 0.28                                  |
| Najman 2022    | Alcohol use disorders | Combined Male and Female | Moderate/Severe CSA               | N/A                  | -0.20           | 0.19                                  |

**Table S16. Summary results of included childhood sexual abuse studies**

| Author         | Health outcome        | Sex                      | Effect size details              | SE adjustment factor | Log effect size | Standard error of the log effect size |
|----------------|-----------------------|--------------------------|----------------------------------|----------------------|-----------------|---------------------------------------|
| Nelson 2002    | Alcohol use disorders | Combined Male and Female |                                  | N/A                  | 0.44            | 0.22                                  |
| Roustit 2009   | Alcohol use disorders | Combined Male and Female |                                  | N/A                  | 0.63            | 0.44                                  |
| Sartor 2007    | Alcohol use disorders | Female                   |                                  | N/A                  | 0.70            | 0.17                                  |
| Laporte 2001   | Anorexia nervosa      | Female                   |                                  | N/A                  | 0.79            | 0.75                                  |
| Paraventi 2011 | Anorexia nervosa      | Female                   | CSA frequency: At Least One Time | N/A                  | 1.76            | 0.76                                  |
| Paraventi 2011 | Anorexia nervosa      | Female                   | CSA frequency: 2 Times Or More   | N/A                  | 2.67            | 1.16                                  |
| Sanci 2008     | Anorexia nervosa      | Female                   | CSA frequency: 1 Report          | N/A                  | 0.00            | 1.01                                  |
| Sanci 2008     | Anorexia nervosa      | Female                   | CSA frequency: $\geq 2$ Reports  | N/A                  | 0.69            | 0.54                                  |
| Talmon 2021    | Anorexia nervosa      | Combined Male and Female |                                  | N/A                  | -0.21           | 0.54                                  |
| Cohen 2001     | Anxiety disorders     | Combined Male and Female |                                  | N/A                  | 1.66            | 0.57                                  |
| Copeland 2018  | Anxiety disorders     | Combined Male and Female |                                  | N/A                  | 0.59            | 0.34                                  |
| Dinwiddie 2000 | Anxiety disorders     | Female                   |                                  | N/A                  | 0.41            | 0.65                                  |

**Table S16. Summary results of included childhood sexual abuse studies**

| Author         | Health outcome    | Sex                      | Effect size details                    | SE adjustment factor | Log effect size | Standard error of the log effect size |
|----------------|-------------------|--------------------------|----------------------------------------|----------------------|-----------------|---------------------------------------|
| Fergusson 2008 | Anxiety disorders | Combined Male and Female |                                        | N/A                  | 0.33            | 0.07                                  |
| Fujiwara 2011  | Anxiety disorders | Combined Male and Female |                                        | N/A                  | 0.34            | 0.54                                  |
| Hovens 2015    | Anxiety disorders | Combined Male and Female | CSA frequency: Once or Sometimes       | N/A                  | -0.17           | 0.54                                  |
| Hovens 2015    | Anxiety disorders | Combined Male and Female | CSA frequency: Regularly or Very Often | N/A                  | -0.27           | 0.55                                  |
| Kendler 2000   | Anxiety disorders | Female                   |                                        | N/A                  | 0.49            | 0.25                                  |
| Kisely 2021    | Anxiety disorders | Combined Male and Female |                                        | N/A                  | 0.48            | 0.19                                  |
| Raposo 2014    | Anxiety disorders | Combined Male and Female |                                        | N/A                  | 0.32            | 0.16                                  |
| Tenhave 2019   | Anxiety disorders | Combined Male and Female |                                        | N/A                  | 0.34            | 0.17                                  |
| Widom 1999     | Anxiety disorders | Combined Male and Female |                                        | N/A                  | 0.94            | 0.28                                  |
| Zinzow 2012    | Anxiety disorders | Female                   |                                        | N/A                  | 1.32            | 0.17                                  |
| Abajobir 2017  | Asthma            | Combined Male and Female |                                        | N/A                  | 0.38            | 0.29                                  |

**Table S16. Summary results of included childhood sexual abuse studies**

| Author         | Health outcome  | Sex                      | Effect size details               | SE adjustment factor | Log effect size | Standard error of the log effect size |
|----------------|-----------------|--------------------------|-----------------------------------|----------------------|-----------------|---------------------------------------|
| Coogan 2013    | Asthma          | Female                   |                                   | N/A                  | 0.14            | 0.13                                  |
| Coogan 2013    | Asthma          | Female                   |                                   | N/A                  | 0.22            | 0.11                                  |
| Han 2022       | Asthma          | Combined Male and Female |                                   | N/A                  | 0.22            | 0.05                                  |
| Kascakova 2022 | Asthma          | Combined Male and Female | Slovak Sample                     | N/A                  | 0.83            | 0.61                                  |
| Kascakova 2022 | Asthma          | Combined Male and Female | Czech Sample                      | N/A                  | 0.64            | 0.33                                  |
| Andrews 1995   | Bulimia nervosa | Female                   |                                   | N/A                  | 2.62            | 0.88                                  |
| Kendler 2000   | Bulimia nervosa | Female                   |                                   | N/A                  | 0.31            | 0.53                                  |
| Paraventi 2011 | Bulimia nervosa | Female                   | CSA frequency: At Least One Time. | N/A                  | -0.01           | 0.72                                  |
| Paraventi 2011 | Bulimia nervosa | Female                   | CSA frequency: 2 Times or More    | N/A                  | 0.62            | 1.06                                  |
| Sanci 2008     | Bulimia nervosa | Female                   | CSA frequency: 1 Report           | N/A                  | 1.03            | 0.60                                  |
| Sanci 2008     | Bulimia nervosa | Female                   | CSA frequency: $\geq 2$ Reports   | N/A                  | 1.74            | 0.48                                  |
| Talmon 2021    | Bulimia nervosa | Combined Male and Female |                                   | N/A                  | 1.81            | 1.17                                  |

**Table S16. Summary results of included childhood sexual abuse studies**

| Author            | Health outcome           | Sex                      | Effect size details               | SE adjustment factor | Log effect size | Standard error of the log effect size |
|-------------------|--------------------------|--------------------------|-----------------------------------|----------------------|-----------------|---------------------------------------|
| Dinwiddie 2000    | Conduct disorder         | Male                     |                                   | N/A                  | 0.69            | 0.71                                  |
| Dinwiddie 2000    | Conduct disorder         | Female                   |                                   | N/A                  | 0.22            | 0.67                                  |
| Fergusson 1996    | Conduct disorder         | Combined Male and Female | Contact CSA Excluding Intercourse | N/A                  | 1.61            | 0.65                                  |
| Fergusson 1996    | Conduct disorder         | Combined Male and Female | CSA Involving Intercourse         | N/A                  | 2.48            | 0.60                                  |
| Nelson 2002       | Conduct disorder         | Combined Male and Female |                                   | N/A                  | 1.10            | 0.41                                  |
| Duncan 2015       | Type 2 diabetes mellitus | Male                     |                                   | N/A                  | 1.34            | 0.48                                  |
| Duncan 2015       | Type 2 diabetes mellitus | Female                   |                                   | N/A                  | -0.34           | 0.41                                  |
| Duncan 2015       | Type 2 diabetes mellitus | Male                     |                                   | N/A                  | -0.45           | 0.39                                  |
| Duncan 2015       | Type 2 diabetes mellitus | Female                   |                                   | N/A                  | 0.03            | 0.26                                  |
| Kascakova 2022    | Type 2 diabetes mellitus | Combined Male and Female | Slovak Sample                     | N/A                  | 0.10            | 0.69                                  |
| Kascakova 2022    | Type 2 diabetes mellitus | Combined Male and Female | Czech Sample                      | N/A                  | 0.79            | 0.35                                  |
| Monnat 2015       | Type 2 diabetes mellitus | Combined Male and Female |                                   | N/A                  | 0.12            | 0.08                                  |
| Rich-Edwards 2010 | Type 2 diabetes mellitus | Female                   |                                   | N/A                  | 0.03            | 0.05                                  |

**Table S16. Summary results of included childhood sexual abuse studies**

| Author            | Health outcome           | Sex                      | Effect size details             | SE adjustment factor | Log effect size | Standard error of the log effect size |
|-------------------|--------------------------|--------------------------|---------------------------------|----------------------|-----------------|---------------------------------------|
| Rich-Edwards 2010 | Type 2 diabetes mellitus | Female                   |                                 | N/A                  | 0.10            | 0.09                                  |
| Rich-Edwards 2010 | Type 2 diabetes mellitus | Female                   |                                 | N/A                  | 0.25            | 0.08                                  |
| Seid 2022         | Type 2 diabetes mellitus | Female                   |                                 | N/A                  | 0.15            | 0.13                                  |
| Shields 2016      | Type 2 diabetes mellitus | Combined Male and Female | Both Frequent and Severe CSA    | N/A                  | 0.69            | 0.23                                  |
| Shields 2016      | Type 2 diabetes mellitus | Combined Male and Female | Severe but Infrequent CSA       | N/A                  | 0.41            | 0.25                                  |
| Shields 2016      | Type 2 diabetes mellitus | Combined Male and Female | Non-Severe CSA at Any Frequency | N/A                  | 0.10            | 0.21                                  |
| Thomas 2008       | Type 2 diabetes mellitus | Combined Male and Female |                                 | N/A                  | -0.87           | 0.64                                  |
| Borges 2021       | Drug use disorders       | Combined Male and Female |                                 | N/A                  | -0.69           | 2.01                                  |
| Cohen 2001        | Drug use disorders       | Combined Male and Female |                                 | N/A                  | 2.01            | 0.54                                  |
| Conroy 2009       | Drug use disorders       | Male                     |                                 | N/A                  | -0.36           | 0.20                                  |
| Conroy 2009       | Drug use disorders       | Female                   |                                 | N/A                  | 0.18            | 0.23                                  |
| Cutajar 2010      | Drug use disorders       | Male                     |                                 | N/A                  | 1.14            | 0.38                                  |
| Cutajar 2010      | Drug use disorders       | Female                   |                                 | N/A                  | 2.18            | 0.33                                  |

**Table S16. Summary results of included childhood sexual abuse studies**

| Author         | Health outcome     | Sex                      | Effect size details                  | SE adjustment factor | Log effect size | Standard error of the log effect size |
|----------------|--------------------|--------------------------|--------------------------------------|----------------------|-----------------|---------------------------------------|
| Duncan 2008    | Drug use disorders | Combined Male and Female |                                      | N/A                  | 0.77            | 0.19                                  |
| Fergusson 1996 | Drug use disorders | Combined Male and Female | Non-Contact CSA                      | N/A                  | -0.36           | 1.04                                  |
| Fergusson 1996 | Drug use disorders | Combined Male and Female | Contact CSA<br>Excluding Intercourse | N/A                  | 0.59            | 0.49                                  |
| Fergusson 1996 | Drug use disorders | Combined Male and Female | CSA Involving Intercourse            | N/A                  | 1.89            | 0.42                                  |
| Huang 2011     | Drug use disorders | Combined Male and Female |                                      | N/A                  | -0.22           | 0.27                                  |
| Kalichman 2001 | Drug use disorders | Male                     |                                      | N/A                  | 0.20            | 0.25                                  |
| Kaukinen 2005  | Drug use disorders | Female                   |                                      | N/A                  | 0.87            | 0.29                                  |
| Kendler 2000   | Drug use disorders | Female                   |                                      | N/A                  | 0.95            | 0.36                                  |
| Najman 2022    | Drug use disorders | Combined Male and Female | Low severity CSA                     | N/A                  | 0.40            | 0.29                                  |
| Najman 2022    | Drug use disorders | Combined Male and Female | Moderate/Severe CSA                  | N/A                  | 0.14            | 0.20                                  |
| Nelson 2006    | Drug use disorders | Combined Male and Female |                                      | N/A                  | 0.55            | 0.11                                  |

**Table S16. Summary results of included childhood sexual abuse studies**

| Author      | Health outcome     | Sex                      | Effect size details | SE adjustment factor | Log effect size | Standard error of the log effect size |
|-------------|--------------------|--------------------------|---------------------|----------------------|-----------------|---------------------------------------|
| Nelson 2006 | Drug use disorders | Combined Male and Female |                     | N/A                  | 1.06            | 0.29                                  |
| Nelson 2006 | Drug use disorders | Combined Male and Female |                     | N/A                  | 1.13            | 0.28                                  |
| Nelson 2006 | Drug use disorders | Combined Male and Female |                     | N/A                  | 1.10            | 0.24                                  |
| Nelson 2006 | Drug use disorders | Combined Male and Female |                     | N/A                  | 0.82            | 0.17                                  |
| Sweet 2013  | Drug use disorders | Female                   |                     | N/A                  | 1.72            | 0.13                                  |
| Sweet 2013  | Drug use disorders | Male                     |                     | N/A                  | 0.89            | 0.07                                  |
| Sweet 2013  | Drug use disorders | Male                     |                     | N/A                  | 1.02            | 0.10                                  |
| Sweet 2013  | Drug use disorders | Male                     |                     | N/A                  | 0.79            | 0.10                                  |
| Sweet 2013  | Drug use disorders | Male                     |                     | N/A                  | 0.89            | 0.13                                  |
| Sweet 2013  | Drug use disorders | Female                   |                     | N/A                  | 0.90            | 0.07                                  |
| Sweet 2013  | Drug use disorders | Female                   |                     | N/A                  | 1.47            | 0.07                                  |
| Sweet 2013  | Drug use disorders | Female                   |                     | N/A                  | 1.12            | 0.17                                  |
| Tanaka 2015 | Drug use disorders | Female                   |                     | N/A                  | 0.10            | 0.25                                  |
| Tanaka 2015 | Drug use disorders | Male                     |                     | N/A                  | 0.59            | 0.30                                  |
| Tonmyr 2017 | Drug use disorders | Male                     |                     | N/A                  | 0.47            | 0.30                                  |



**Table S16. Summary results of included childhood sexual abuse studies**

| Author          | Health outcome         | Sex                      | Effect size details                 | SE adjustment factor | Log effect size | Standard error of the log effect size |
|-----------------|------------------------|--------------------------|-------------------------------------|----------------------|-----------------|---------------------------------------|
| Tonmyr 2017     | Drug use disorders     | Female                   |                                     | N/A                  | 0.88            | 0.24                                  |
| Zinzow 2012     | Drug use disorders     | Female                   |                                     | N/A                  | 1.39            | 0.42                                  |
| Deyessa 2018    | HIV/AIDS               | Female                   |                                     | N/A                  | 0.97            | 0.53                                  |
| Maman 2002      | HIV/AIDS               | Female                   |                                     | N/A                  | 0.47            | 0.54                                  |
| Mimiaga 2009    | HIV/AIDS               | Male                     |                                     | N/A                  | 0.26            | 0.13                                  |
| Naicker 2022    | HIV/AIDS               | Male                     |                                     | N/A                  | 1.03            | 1.20                                  |
| Naicker 2022    | HIV/AIDS               | Female                   |                                     | N/A                  | 1.20            | 0.61                                  |
| Widom 2012      | HIV/AIDS               | Combined Male and Female |                                     | N/A                  | 1.96            | 1.67                                  |
| Wyatt 2002      | HIV/AIDS               | Female                   |                                     | N/A                  | 0.34            | 0.20                                  |
| Xavierhall 2021 | HIV/AIDS               | Combined Male and Female | Forced Sexual Touching CSA          | N/A                  | -0.11           | 0.30                                  |
| Xavierhall 2021 | HIV/AIDS               | Combined Male and Female | Forced Touching and Penetrative CSA | N/A                  | 0.18            | 0.29                                  |
| Dong 2004       | Ischemic heart disease | Combined Male and Female |                                     | N/A                  | 0.34            | 0.05                                  |
| Kascakova 2022  | Ischemic heart disease | Combined Male and Female | Czech Sample                        | N/A                  | 1.19            | 0.44                                  |
| Kascakova 2022  | Ischemic heart disease | Combined Male and Female | Slovak Sample                       | N/A                  | 0.53            | 0.85                                  |

**Table S16. Summary results of included childhood sexual abuse studies**

| Author         | Health outcome            | Sex                      | Effect size details | SE adjustment factor | Log effect size | Standard error of the log effect size |
|----------------|---------------------------|--------------------------|---------------------|----------------------|-----------------|---------------------------------------|
| Monnat 2015    | Ischemic heart disease    | Combined Male and Female |                     | N/A                  | -0.15           | 0.13                                  |
| Andrews 1995   | Major depressive disorder | Female                   |                     | N/A                  | 1.25            | 0.70                                  |
| Bifulco 1991   | Major depressive disorder | Female                   |                     | N/A                  | 1.64            | 0.44                                  |
| Chapman 2004   | Major depressive disorder | Female                   |                     | N/A                  | 0.69            | 0.08                                  |
| Chapman 2004   | Major depressive disorder | Male                     |                     | N/A                  | 0.47            | 0.14                                  |
| Cheasty 1998   | Major depressive disorder | Female                   |                     | N/A                  | 0.69            | 0.31                                  |
| Cohen 2001     | Major depressive disorder | Combined Male and Female |                     | N/A                  | 1.57            | 0.56                                  |
| Comijs 2013    | Major depressive disorder | Combined Male and Female |                     | N/A                  | 1.68            | 0.39                                  |
| Copeland 2018  | Major depressive disorder | Combined Male and Female |                     | N/A                  | 0.79            | 0.38                                  |
| Dinwiddie 2000 | Major depressive disorder | Female                   |                     | N/A                  | 0.36            | 0.35                                  |
| Dinwiddie 2000 | Major depressive disorder | Male                     |                     | N/A                  | 0.41            | 0.65                                  |
| Dube 2005      | Major depressive disorder | Male                     |                     | N/A                  | 0.18            | 0.14                                  |
| Dube 2005      | Major depressive disorder | Female                   |                     | N/A                  | 0.34            | 0.10                                  |
| Ebert 2019     | Major depressive disorder | Combined Male and Female |                     | N/A                  | 2.08            | 0.81                                  |

**Table S16. Summary results of included childhood sexual abuse studies**

| Author         | Health outcome            | Sex                      | Effect size details                    | SE adjustment factor | Log effect size | Standard error of the log effect size |
|----------------|---------------------------|--------------------------|----------------------------------------|----------------------|-----------------|---------------------------------------|
| Fergusson 2008 | Major depressive disorder | Combined Male and Female |                                        | N/A                  | 0.44            | 0.07                                  |
| Galloeag 2017  | Major depressive disorder | Female                   |                                        | N/A                  | -0.36           | 0.44                                  |
| Houtepen 2020  | Major depressive disorder | Combined Male and Female |                                        | N/A                  | 0.73            | 0.21                                  |
| Hovens 2015    | Major depressive disorder | Combined Male and Female | CSA frequency: Once or Sometimes       | N/A                  | 0.24            | 0.43                                  |
| Hovens 2015    | Major depressive disorder | Combined Male and Female | CSA frequency: Regularly or Very Often | N/A                  | 0.56            | 0.36                                  |
| Jaffee 2002    | Major depressive disorder | Combined Male and Female |                                        | N/A                  | 0.82            | 0.24                                  |
| Kendler 2000   | Major depressive disorder | Female                   |                                        | N/A                  | 0.51            | 0.18                                  |
| Kisely 2021    | Major depressive disorder | Combined Male and Female |                                        | N/A                  | 0.59            | 0.17                                  |
| Mullen 1996    | Major depressive disorder | Female                   |                                        | N/A                  | 1.35            | 0.33                                  |
| Nelson 2002    | Major depressive disorder | Female                   |                                        | N/A                  | 0.65            | 0.10                                  |
| Nelson 2002    | Major depressive disorder | Combined Male and Female |                                        | N/A                  | 0.44            | 0.20                                  |
| Nelson 2002    | Major depressive disorder | Male                     |                                        | N/A                  | 0.63            | 0.20                                  |

**Table S16. Summary results of included childhood sexual abuse studies**

| Author                | Health outcome                    | Sex                      | Effect size details      | SE adjustment factor | Log effect size | Standard error of the log effect size |
|-----------------------|-----------------------------------|--------------------------|--------------------------|----------------------|-----------------|---------------------------------------|
| Ratner 2003           | Major depressive disorder         | Male                     |                          | N/A                  | 0.85            | 0.44                                  |
| Roustit 2009          | Major depressive disorder         | Combined Male and Female |                          | N/A                  | 0.70            | 0.31                                  |
| Su 2022               | Major depressive disorder         | Combined Male and Female |                          | N/A                  | 0.36            | 0.10                                  |
| Widom 2007            | Major depressive disorder         | Combined Male and Female |                          | N/A                  | 0.09            | 0.35                                  |
| Wise 2001             | Major depressive disorder         | Female                   |                          | N/A                  | 0.59            | 0.22                                  |
| Xiao 2022             | Major depressive disorder         | Combined Male and Female |                          | N/A                  | 0.03            | 0.20                                  |
| Zinzow 2012           | Major depressive disorder         | Female                   |                          | N/A                  | 1.19            | 0.19                                  |
| Abajobir 2018         | Maternal abortion and miscarriage | Female                   | Pregnancy Miscarriage    | 2                    | 0.22            | 0.70                                  |
| Abajobir 2018         | Maternal abortion and miscarriage | Female                   | Termination Of Pregnancy | 2                    | -0.09           | 0.74                                  |
| Demakakos 2020        | Maternal abortion and miscarriage | Female                   | Recurrent Miscarriage    | N/A                  | 0.74            | 0.33                                  |
| Demakakos 2020        | Maternal abortion and miscarriage | Female                   | Single Miscarriage       | N/A                  | 0.27            | 0.26                                  |
| Fortin-Langelier 2019 | Maternal abortion and miscarriage | Female                   |                          | N/A                  | 1.20            | 0.34                                  |

**Table S16. Summary results of included childhood sexual abuse studies**

| Author               | Health outcome                    | Sex                      | Effect size details | SE adjustment factor | Log effect size | Standard error of the log effect size |
|----------------------|-----------------------------------|--------------------------|---------------------|----------------------|-----------------|---------------------------------------|
| Kerkar 2021          | Maternal abortion and miscarriage | Female                   |                     | N/A                  | 0.03            | 0.23                                  |
| Taft 2019            | Maternal abortion and miscarriage | Female                   |                     | N/A                  | 0.16            | 0.11                                  |
| Vanroode 2009        | Maternal abortion and miscarriage | Female                   |                     | N/A                  | 0.34            | 0.19                                  |
| Chatziioannidis 2019 | Schizophrenia                     | Combined Male and Female |                     | N/A                  | 2.75            | 1.06                                  |
| Cutajar 2010         | Schizophrenia                     | Combined Male and Female |                     | N/A                  | 0.96            | 0.26                                  |
| Mall 2020            | Schizophrenia                     | Combined Male and Female |                     | N/A                  | 0.20            | 0.10                                  |
| Mansueto 2022        | Schizophrenia                     | Female                   |                     | N/A                  | 2.32            | 0.85                                  |
| Murphy 2020          | Schizophrenia                     | Combined Male and Female |                     | N/A                  | 2.06            | 0.63                                  |
| Banyard 2004         | Self-harm                         | Male                     |                     | N/A                  | 0.42            | 0.23                                  |
| Bentivegna 2022      | Self-harm                         | Female                   |                     | N/A                  | 0.58            | 0.08                                  |
| Bentivegna 2022      | Self-harm                         | Male                     |                     | N/A                  | 0.77            | 0.14                                  |
| Borges 2021          | Self-harm                         | Combined Male and Female |                     | N/A                  | 0.34            | 0.64                                  |

**Table S16. Summary results of included childhood sexual abuse studies**

| Author             | Health outcome | Sex                      | Effect size details | SE adjustment factor | Log effect size | Standard error of the log effect size |
|--------------------|----------------|--------------------------|---------------------|----------------------|-----------------|---------------------------------------|
| Brown 1999         | Self-harm      | Combined Male and Female |                     | N/A                  | 1.82            | 0.73                                  |
| Chen 2014          | Self-harm      | Female                   |                     | N/A                  | 0.41            | 0.12                                  |
| Dinwiddie 2000     | Self-harm      | Female                   |                     | N/A                  | 0.85            | 0.69                                  |
| Dube 2005          | Self-harm      | Male                     |                     | N/A                  | 0.74            | 0.19                                  |
| Dube 2005          | Self-harm      | Female                   |                     | N/A                  | 0.79            | 0.10                                  |
| Enns 2006          | Self-harm      | Combined Male and Female |                     | N/A                  | -1.14           | 1.18                                  |
| Guiney 2022        | Self-harm      | Combined Male and Female |                     | N/A                  | 0.97            | 0.19                                  |
| Kiselydmedres 2022 | Self-harm      | Combined Male and Female |                     | N/A                  | 1.10            | 0.36                                  |
| Mullen 1996        | Self-harm      | Female                   |                     | N/A                  | 2.93            | 0.47                                  |
| Nelson 2002        | Self-harm      | Combined Male and Female |                     | N/A                  | 1.00            | 0.35                                  |
| Rajapakse 2020     | Self-harm      | Combined Male and Female |                     | N/A                  | 0.37            | 0.27                                  |
| Roustit 2009       | Self-harm      | Combined Male and Female |                     | N/A                  | 0.97            | 0.47                                  |

**Table S16. Summary results of included childhood sexual abuse studies**

| Author          | Health outcome                                | Sex                      | Effect size details                 | SE adjustment factor | Log effect size | Standard error of the log effect size |
|-----------------|-----------------------------------------------|--------------------------|-------------------------------------|----------------------|-----------------|---------------------------------------|
| Thompson 2019   | Self-harm                                     | Combined Male and Female |                                     | N/A                  | 1.03            | 0.27                                  |
| Xavierhall 2021 | Self-harm                                     | Combined Male and Female | CSA Forced Sexual Touching          | N/A                  | -0.11           | 0.54                                  |
| Xavierhall 2021 | Self-harm                                     | Combined Male and Female | Forced Touching and Penetrative CSA | N/A                  | 0.79            | 0.44                                  |
| Guiney 2022     | Sexually transmitted infections excluding HIV | Combined Male and Female |                                     | N/A                  | 0.30            | 0.14                                  |
| Haydon 2011     | Sexually transmitted infections excluding HIV | Male                     | Self-Reported STD in Past 12 Months | 2                    | -0.46           | 1.15                                  |
| Haydon 2011     | Sexually transmitted infections excluding HIV | Female                   | Self-Reported STD in Past 12 Months | 2                    | 0.29            | 0.45                                  |
| Haydon 2011     | Sexually transmitted infections excluding HIV | Female                   | Test-Identified Current STD         | 2                    | 0.06            | 0.40                                  |
| Haydon 2011     | Sexually transmitted infections excluding HIV | Male                     | Test-Identified Current STD         | 2                    | 0.26            | 0.67                                  |
| Wilson 2009     | Sexually transmitted infections excluding HIV | Combined Male and Female | Specific STD: Chlamydia             | 4                    | 0.41            | 0.92                                  |
| Wilson 2009     | Sexually transmitted infections excluding HIV | Combined Male and Female | Specific STD: Genital herpes        | 4                    | 0.40            | 1.61                                  |
| Wilson 2009     | Sexually transmitted infections excluding HIV | Combined Male and Female | Specific STD: Gonorrhea             | 4                    | 0.52            | 0.89                                  |

**Table S16. Summary results of included childhood sexual abuse studies**

| Author          | Health outcome                                | Sex                      | Effect size details                 | SE adjustment factor | Log effect size | Standard error of the log effect size |
|-----------------|-----------------------------------------------|--------------------------|-------------------------------------|----------------------|-----------------|---------------------------------------|
| Wilson 2009     | Sexually transmitted infections excluding HIV | Combined Male and Female | Specific STD: Syphilis              | 4                    | 1.45            | 1.34                                  |
| Xavierhall 2021 | Sexually transmitted infections excluding HIV | Combined Male and Female | Forced Sexual Touching CSA          | N/A                  | 0.00            | 0.27                                  |
| Xavierhall 2021 | Sexually transmitted infections excluding HIV | Combined Male and Female | Forced Touching and Penetrative CSA | N/A                  | 0.41            | 0.29                                  |



## Section 3: PRISMA and GATHER

### Section 3.1: PRISMA

Table S17. PRISMA 2020 abstract checklist

| Section and Topic       | Item # | Checklist item                                                                                                                                                                                                                                                                                        | Reported (Yes/No)                                                                       |
|-------------------------|--------|-------------------------------------------------------------------------------------------------------------------------------------------------------------------------------------------------------------------------------------------------------------------------------------------------------|-----------------------------------------------------------------------------------------|
| <b>TITLE</b>            |        |                                                                                                                                                                                                                                                                                                       |                                                                                         |
| Title                   | 1      | Identify the report as a systematic review.                                                                                                                                                                                                                                                           | Yes, briefly.                                                                           |
| <b>BACKGROUND</b>       |        |                                                                                                                                                                                                                                                                                                       |                                                                                         |
| Objectives              | 2      | Provide an explicit statement of the main objective(s) or question(s) the review addresses.                                                                                                                                                                                                           | Yes.                                                                                    |
| <b>METHODS</b>          |        |                                                                                                                                                                                                                                                                                                       |                                                                                         |
| Eligibility criteria    | 3      | Specify the inclusion and exclusion criteria for the review.                                                                                                                                                                                                                                          | Not in abstract. Covered in detail in the main text and supplementary information.      |
| Information sources     | 4      | Specify the information sources (e.g. databases, registers) used to identify studies and the date when each was last searched.                                                                                                                                                                        | Not in abstract. Covered in detail in the main text and supplementary information.      |
| Risk of bias            | 5      | Specify the methods used to assess risk of bias in the included studies.                                                                                                                                                                                                                              | Not in abstract. Covered in detail in the main text and supplementary information.      |
| Synthesis of results    | 6      | Specify the methods used to present and synthesise results.                                                                                                                                                                                                                                           | Yes, briefly. More detail provided in the main text and supplementary information.      |
| <b>RESULTS</b>          |        |                                                                                                                                                                                                                                                                                                       |                                                                                         |
| Included studies        | 7      | Give the total number of included studies and participants and summarise relevant characteristics of studies.                                                                                                                                                                                         | Not in abstract. Covered in detail in the main text and supplementary information.      |
| Synthesis of results    | 8      | Present results for main outcomes, preferably indicating the number of included studies and participants for each. If meta-analysis was done, report the summary estimate and confidence/credible interval. If comparing groups, indicate the direction of the effect (i.e. which group is favoured). | Yes, very briefly. More detail provided in the main text and supplementary information. |
| <b>DISCUSSION</b>       |        |                                                                                                                                                                                                                                                                                                       |                                                                                         |
| Limitations of evidence | 9      | Provide a brief summary of the limitations of the evidence included in the review (e.g. study risk of bias, inconsistency and imprecision).                                                                                                                                                           | Not in abstract. Covered in detail in the main text and supplementary information.      |
| Interpretation          | 10     | Provide a general interpretation of the results and important implications.                                                                                                                                                                                                                           | Yes                                                                                     |
| <b>OTHER</b>            |        |                                                                                                                                                                                                                                                                                                       |                                                                                         |
| Funding                 | 11     | Specify the primary source of funding for the review.                                                                                                                                                                                                                                                 | Not in abstract but described in the main text.                                         |
| Registration            | 12     | Provide the register name and registration number.                                                                                                                                                                                                                                                    | Not in abstract but reported in main text methods section.                              |

Table S18. PRISMA 2020 checklist

| Section and | Item | Checklist item | Location where item is |
|-------------|------|----------------|------------------------|
|-------------|------|----------------|------------------------|

| Topic                   | m # |                                                                                                                                                                                                                                                                                                      | reported                                                                                                                                                                                                            |
|-------------------------|-----|------------------------------------------------------------------------------------------------------------------------------------------------------------------------------------------------------------------------------------------------------------------------------------------------------|---------------------------------------------------------------------------------------------------------------------------------------------------------------------------------------------------------------------|
| <b>TITLE</b>            |     |                                                                                                                                                                                                                                                                                                      |                                                                                                                                                                                                                     |
| Title                   | 1   | Identify the report as a systematic review.                                                                                                                                                                                                                                                          | Manuscript Title and Methods Section Headings                                                                                                                                                                       |
| <b>ABSTRACT</b>         |     |                                                                                                                                                                                                                                                                                                      |                                                                                                                                                                                                                     |
| Abstract                | 2   | See the PRISMA 2020 for Abstracts checklist.                                                                                                                                                                                                                                                         | Abstract section in main text                                                                                                                                                                                       |
| <b>INTRODUCTION</b>     |     |                                                                                                                                                                                                                                                                                                      |                                                                                                                                                                                                                     |
| Rationale               | 3   | Describe the rationale for the review in the context of existing knowledge.                                                                                                                                                                                                                          | Main section in-text                                                                                                                                                                                                |
| Objectives              | 4   | Provide an explicit statement of the objective(s) or question(s) the review addresses.                                                                                                                                                                                                               | Main section in-text                                                                                                                                                                                                |
| <b>METHODS</b>          |     |                                                                                                                                                                                                                                                                                                      |                                                                                                                                                                                                                     |
| Eligibility criteria    | 5   | Specify the inclusion and exclusion criteria for the review and how studies were grouped for the syntheses.                                                                                                                                                                                          | “Systematic Review” section in Methods & Section 1.2: Inclusion and Exclusion Criteria in Supplementary Information                                                                                                 |
| Information sources     | 6   | Specify all databases, registers, websites, organisations, reference lists and other sources searched or consulted to identify studies. Specify the date when each source was last searched or consulted.                                                                                            | “Systematic Review” section in Methods & Section 1.1: Literature searches in Supplementary Information                                                                                                              |
| Search strategy         | 7   | Present the full search strategies for all databases, registers and websites, including any filters and limits used.                                                                                                                                                                                 | “Systematic Review” section in Methods & Section 1.1: Literature searches in Supplementary Information                                                                                                              |
| Selection process       | 8   | Specify the methods used to decide whether a study met the inclusion criteria of the review, including how many reviewers screened each record and each report retrieved, whether they worked independently, and if applicable, details of automation tools used in the process.                     | “Systematic Review” section in Methods main text                                                                                                                                                                    |
| Data collection process | 9   | Specify the methods used to collect data from reports, including how many reviewers collected data from each report, whether they worked independently, any processes for obtaining or confirming data from study investigators, and if applicable, details of automation tools used in the process. | “Systematic Review” section in Methods main text                                                                                                                                                                    |
| Data items              | 10a | List and define all outcomes for which data were sought. Specify whether all results that were compatible with each outcome domain in each study were sought (e.g. for all measures, time points, analyses), and if not, the methods used to decide which results to collect.                        | “Data selection” section in Methods main text; Supplementary Information Section 1.3: Exposure and Outcome Definitions; Table S2: Definitions of included risk factors & Table S3: Definitions of included outcomes |
|                         | 10b | List and define all other variables for which data were sought (e.g. participant and intervention characteristics, funding sources). Describe any assumptions made about any missing or unclear information.                                                                                         | Section 1.4; Data Extraction in Supplementary Information                                                                                                                                                           |
| Study risk of bias      | 11  | Specify the methods used to assess risk of bias in the included studies, including details of the tool(s) used, how many reviewers assessed each study and whether they worked                                                                                                                       | “Testing and adjusting for biases across study                                                                                                                                                                      |

|                           |     |                                                                                                                                                                                                                                                             |                                                                                                                                                                 |
|---------------------------|-----|-------------------------------------------------------------------------------------------------------------------------------------------------------------------------------------------------------------------------------------------------------------|-----------------------------------------------------------------------------------------------------------------------------------------------------------------|
| assessment                |     | independently, and if applicable, details of automation tools used in the process.                                                                                                                                                                          | designs and characteristics” in Methods section; Supplementary Information Section 5.1.1: Definitions of bias covariates                                        |
| Effect measures           | 12  | Specify for each outcome the effect measure(s) (e.g. risk ratio, mean difference) used in the synthesis or presentation of results.                                                                                                                         | Section 2.2: Effect Size Data Details in Supplementary Information                                                                                              |
| Synthesis methods         | 13a | Describe the processes used to decide which studies were eligible for each synthesis (e.g. tabulating the study intervention characteristics and comparing against the planned groups for each synthesis (item #5)).                                        | “Data Selection” in Methods main text                                                                                                                           |
|                           | 13b | Describe any methods required to prepare the data for presentation or synthesis, such as handling of missing summary statistics, or data conversions.                                                                                                       | Methods main text; Section 6 in Supplementary Information                                                                                                       |
|                           | 13c | Describe any methods used to tabulate or visually display results of individual studies and syntheses.                                                                                                                                                      | Methods main text; Sections 4-6 in Supplementary Information                                                                                                    |
|                           | 13d | Describe any methods used to synthesize results and provide a rationale for the choice(s). If meta-analysis was performed, describe the model(s), method(s) to identify the presence and extent of statistical heterogeneity, and software package(s) used. | “Estimating the burden of proof risk function” methods main text; Sections 4-6 in Supplementary Information                                                     |
|                           | 13e | Describe any methods used to explore possible causes of heterogeneity among study results (e.g. subgroup analysis, meta-regression).                                                                                                                        | “Quantifying between-study heterogeneity” methods main text; Supplementary Information Section 6: Sensitivity Analyses and Supplementary Results                |
|                           | 13f | Describe any sensitivity analyses conducted to assess robustness of the synthesized results.                                                                                                                                                                | Results section in main text; Supplementary Information Section 6: Sensitivity Analyses and Supplementary Results                                               |
| Reporting bias assessment | 14  | Describe any methods used to assess risk of bias due to missing results in a synthesis (arising from reporting biases).                                                                                                                                     | “Testing and adjusting for biases across study designs and characteristics” in Methods main text; Section 5: Supplementary Methods in Supplementary Information |
| Certainty assessment      | 15  | Describe any methods used to assess certainty (or confidence) in the body of evidence for an outcome.                                                                                                                                                       | “Estimating the burden of proof risk function” in Methods main text                                                                                             |
| <b>RESULTS</b>            |     |                                                                                                                                                                                                                                                             |                                                                                                                                                                 |
| Study selection           | 16a | Describe the results of the search and selection process, from the number of records identified in the search to the number of studies included in the review, ideally using a flow diagram.                                                                | PRISMA flow diagram (Section 1.5 in Supplementary Information); “Data selection” in methods main text                                                           |

|                               |     |                                                                                                                                                                                                                                                                                      |                                                                                                                                                                                                     |
|-------------------------------|-----|--------------------------------------------------------------------------------------------------------------------------------------------------------------------------------------------------------------------------------------------------------------------------------------|-----------------------------------------------------------------------------------------------------------------------------------------------------------------------------------------------------|
|                               | 16b | Cite studies that might appear to meet the inclusion criteria, but which were excluded, and explain why they were excluded.                                                                                                                                                          | N/A                                                                                                                                                                                                 |
| Study characteristics         | 17  | Cite each included study and present its characteristics.                                                                                                                                                                                                                            | Table S6: Summary of Study Metadata and Characteristics for intimate partner violence & Table S7: Summary of Study Metadata and Characteristics for childhood sexual abuse (Section 2: Data Inputs) |
| Risk of bias in studies       | 18  | Present assessments of risk of bias for each included study.                                                                                                                                                                                                                         | Table S10: Bias covariates for intimate partner studies & Table S11: Study Bias Characteristics for childhood sexual abuse (Section 3)                                                              |
| Results of individual studies | 19  | For all outcomes, present, for each study: (a) summary statistics for each group (where appropriate) and (b) an effect estimate and its precision (e.g. confidence/credible interval), ideally using structured tables or plots.                                                     | Section 4: The RR Estimates and their 95% Uncertainty Interval for All Risk-Outcome Pairs                                                                                                           |
| Results of syntheses          | 20a | For each synthesis, briefly summarise the characteristics and risk of bias among contributing studies.                                                                                                                                                                               | Section 2: Data inputs in Supplementary Information; Section 3: Study quality and bias assessment in Supplementary Information                                                                      |
|                               | 20b | Present results of all statistical syntheses conducted. If meta-analysis was done, present for each the summary estimate and its precision (e.g. confidence/credible interval) and measures of statistical heterogeneity. If comparing groups, describe the direction of the effect. | Results in main text; Section 4: Supplementary results in Supplementary Information                                                                                                                 |
|                               | 20c | Present results of all investigations of possible causes of heterogeneity among study results.                                                                                                                                                                                       | Section 6: Sensitivity Analyses and Supplementary Results in Supplementary Information                                                                                                              |
|                               | 20d | Present results of all sensitivity analyses conducted to assess the robustness of the synthesized results.                                                                                                                                                                           | Section 6: Sensitivity Analyses and Supplementary Results in Supplementary Information                                                                                                              |
| Reporting biases              | 21  | Present assessments of risk of bias due to missing results (arising from reporting biases) for each synthesis assessed.                                                                                                                                                              | Results section main text; Section 6 in Supplementary Results                                                                                                                                       |
| Certainty of evidence         | 22  | Present assessments of certainty (or confidence) in the body of evidence for each outcome assessed.                                                                                                                                                                                  | Results section main text                                                                                                                                                                           |
| <b>DISCUSSION</b>             |     |                                                                                                                                                                                                                                                                                      |                                                                                                                                                                                                     |
| Discussion                    | 23a | Provide a general interpretation of the results in the context of other evidence.                                                                                                                                                                                                    | Discussion section main text                                                                                                                                                                        |
|                               | 23b | Discuss any limitations of the evidence included in the review.                                                                                                                                                                                                                      | Discussion section main text                                                                                                                                                                        |
|                               | 23c | Discuss any limitations of the review processes used.                                                                                                                                                                                                                                | Discussion section main text                                                                                                                                                                        |
|                               | 23d | Discuss implications of the results for practice, policy, and future research.                                                                                                                                                                                                       | Discussion section main                                                                                                                                                                             |

|                                                |     |                                                                                                                                                                                                                                            |                                                                                                                                                                                                                                                   |
|------------------------------------------------|-----|--------------------------------------------------------------------------------------------------------------------------------------------------------------------------------------------------------------------------------------------|---------------------------------------------------------------------------------------------------------------------------------------------------------------------------------------------------------------------------------------------------|
|                                                |     |                                                                                                                                                                                                                                            | text                                                                                                                                                                                                                                              |
| <b>OTHER INFORMATION</b>                       |     |                                                                                                                                                                                                                                            |                                                                                                                                                                                                                                                   |
| Registration and protocol                      | 24a | Provide registration information for the review, including register name and registration number, or state that the review was not registered.                                                                                             | The systematic review was registered in PROSPERO (CRD42022299831); The entirety of the Global Burden of Diseases, Injuries, and Risk Factors Study has been registered and approved through the UW IRB, as detailed in Methods section main text. |
|                                                | 24b | Indicate where the review protocol can be accessed, or state that a protocol was not prepared.                                                                                                                                             | Review protocol publication cited in Methods section main text; review was registered in PROSPERO (CRD42022299831)                                                                                                                                |
|                                                | 24c | Describe and explain any amendments to information provided at registration or in the protocol.                                                                                                                                            | NA                                                                                                                                                                                                                                                |
| Support                                        | 25  | Describe sources of financial or non-financial support for the review, and the role of the funders or sponsors in the review.                                                                                                              | Main text "Acknowledgments"                                                                                                                                                                                                                       |
| Competing interests                            | 26  | Declare any competing interests of review authors.                                                                                                                                                                                         | Main text "Competing interests"                                                                                                                                                                                                                   |
| Availability of data, code and other materials | 27  | Report which of the following are publicly available and where they can be found; template data collection forms; data extracted from included studies; data used for all analyses; analytic code; any other materials used in the review. | Main text "Data availability" and "Code availability" sections; data collection form template in SI Table 5                                                                                                                                       |

## Section 3.2: GATHER

Table S19: GATHER Checklist

| Item #                                                                               | Checklist item                                                                                                                                                                                                        | Reported on page #                                                                                  |
|--------------------------------------------------------------------------------------|-----------------------------------------------------------------------------------------------------------------------------------------------------------------------------------------------------------------------|-----------------------------------------------------------------------------------------------------|
| <b>Objectives and funding</b>                                                        |                                                                                                                                                                                                                       |                                                                                                     |
| 1                                                                                    | Define the indicator(s), populations (including age, sex, and geographic entities), and time period(s) for which estimates were made.                                                                                 | Main text Methods overview and systematic review sections (p 41-43)                                 |
| 2                                                                                    | List the funding sources for the work.                                                                                                                                                                                | Main text Acknowledgement section (Pg 12)                                                           |
| <b>Data Inputs</b>                                                                   |                                                                                                                                                                                                                       |                                                                                                     |
| For all data inputs from multiple sources that are synthesized as part of the study: |                                                                                                                                                                                                                       |                                                                                                     |
| 3                                                                                    | Describe how the data were identified and how the data were accessed.                                                                                                                                                 | Main text Methods overview and systematic review sections (p 41-43)                                 |
| 4                                                                                    | Specify the inclusion and exclusion criteria. Identify all ad-hoc exclusions.                                                                                                                                         | Main text Methods systematic review section (p 41-43); Supplementary Information Section 4.2 (p 77) |
| 5                                                                                    | Provide information on all included data sources and their main characteristics. For each data source used, report reference information or contact name/institution, population represented, data collection method, | SI Table S1 & S8 (Pg 4 and 15)                                                                      |

|                                                                                                |                                                                                                                                                                                                                                                                                                                                                                                           |                                                                                                                                                                                                                   |
|------------------------------------------------------------------------------------------------|-------------------------------------------------------------------------------------------------------------------------------------------------------------------------------------------------------------------------------------------------------------------------------------------------------------------------------------------------------------------------------------------|-------------------------------------------------------------------------------------------------------------------------------------------------------------------------------------------------------------------|
|                                                                                                | year(s) of data collection, sex and age range, diagnostic criteria or measurement method, and sample size, as relevant.                                                                                                                                                                                                                                                                   |                                                                                                                                                                                                                   |
| 6                                                                                              | Identify and describe any categories of input data that have potentially important biases (e.g., based on characteristics listed in item 5).                                                                                                                                                                                                                                              | SI Section 6 (Pg 94)                                                                                                                                                                                              |
| For data inputs that contribute to the analysis but were not synthesized as part of the study: |                                                                                                                                                                                                                                                                                                                                                                                           |                                                                                                                                                                                                                   |
| 7                                                                                              | Describe and give sources for any other data inputs.                                                                                                                                                                                                                                                                                                                                      | N/A                                                                                                                                                                                                               |
| For all data inputs:                                                                           |                                                                                                                                                                                                                                                                                                                                                                                           |                                                                                                                                                                                                                   |
| 8                                                                                              | Provide all data inputs in a file format from which data can be efficiently extracted (e.g., a spreadsheet rather than a PDF), including all relevant meta-data listed in item 5. For any data inputs that cannot be shared because of ethical or legal reasons, such as third-party ownership, provide a contact name or the name of the institution that retains the right to the data. | Data inputs in excel format available on the GHDx ( <a href="https://preview.healthdata.org/burden-of-proof/">https://preview.healthdata.org/burden-of-proof/</a> ; username: PreviewUser; password: IHMEPreview) |
| Data analysis                                                                                  |                                                                                                                                                                                                                                                                                                                                                                                           |                                                                                                                                                                                                                   |
| 9                                                                                              | Provide a conceptual overview of the data analysis method. A diagram may be helpful.                                                                                                                                                                                                                                                                                                      | Main text methods overview section (p 41)                                                                                                                                                                         |
| 10                                                                                             | Provide a detailed description of all steps of the analysis, including mathematical formulae. This description should cover, as relevant, data cleaning, data pre-processing, data adjustments and weighting of data sources, and mathematical or statistical model(s).                                                                                                                   | Main text methods section (p 41)                                                                                                                                                                                  |
| 11                                                                                             | Describe how candidate models were evaluated and how the final model(s) were selected.                                                                                                                                                                                                                                                                                                    | Main text methods “Model validation” section (p 47)                                                                                                                                                               |
| 12                                                                                             | Provide the results of an evaluation of model performance, if done, as well as the results of any relevant sensitivity analysis.                                                                                                                                                                                                                                                          | Main text methods “Model validation” section (p 47); SI section 1.2 and 1.5 (p 10 and 36)                                                                                                                         |
| 13                                                                                             | Describe methods for calculating uncertainty of the estimates. State which sources of uncertainty were, and were not, accounted for in the uncertainty analysis.                                                                                                                                                                                                                          | Main text methods “Quantifying between-study heterogeneity” (p 46)                                                                                                                                                |
| 14                                                                                             | State how analytic or statistical source code used to generate estimates can be accessed.                                                                                                                                                                                                                                                                                                 | <a href="https://github.com/ihmeuw-msca/burden-of-proof/">https://github.com/ihmeuw-msca/burden-of-proof/</a>                                                                                                     |
| Results and Discussion                                                                         |                                                                                                                                                                                                                                                                                                                                                                                           |                                                                                                                                                                                                                   |
| 15                                                                                             | Provide published estimates in a file format from which data can be efficiently extracted.                                                                                                                                                                                                                                                                                                | ( <a href="https://preview.healthdata.org/burden-of-proof/">https://preview.healthdata.org/burden-of-proof/</a> ; username: PreviewUser; password: IHMEPreview)                                                   |
| 16                                                                                             | Report a quantitative measure of the uncertainty of the estimates (e.g. uncertainty intervals).                                                                                                                                                                                                                                                                                           | Results section in main text (p 4-8); Table 2                                                                                                                                                                     |
| 17                                                                                             | Interpret results in light of existing evidence. If updating a previous set of estimates, describe the reasons for changes in estimates.                                                                                                                                                                                                                                                  | Main text discussion section (p 8-12)                                                                                                                                                                             |
| 18                                                                                             | Discuss limitations of the estimates. Include a discussion of any modelling assumptions or data limitations that affect interpretation of the estimates.                                                                                                                                                                                                                                  | Main text discussion section (p 8-12)                                                                                                                                                                             |

## Section 4: Data source identification and assessment

We conducted a systematic search of 7 databases (PubMed; Embase/Elsevier; Cumulative Index to Nursing and Allied Health Literature (CINAHL), PsychInfo; Global Index Medicus; Cochrane; Web of Science) to identify relevant literature published from 1 January 1970 to 31 January 2023. The date of our original search was September 30, 2021, and our search was updated to include literature published between 30 September and 31 January 2023 on February 6, 2023. The search strings applied to each database are reported in Section 4.1 and have been previously published in our review protocol. Across the seven databases searched, we found 242,397 results, of which 175,198 were duplicative, leaving 67,221 unique studies. Systematic reviews that were captured through our search were flagged for separate citation searching process (Supplementary Information Section 4.3). All sources were title/abstract and full text screened for acceptance based on the inclusion and exclusion criteria detailed in section 4.2.

### Section 4.1: Literature searches

#### PubMed Search String

("Sex Offenses"[mh] OR "Violence"[mh:noexp] OR "Domestic Violence"[mh] OR "Gender-Based Violence"[mh] OR "Intimate Partner Violence"[mh] OR "Physical Abuse"[mh] OR "Rape"[mh] OR "Torture"[mh] OR "Workplace Violence"[mh] OR "Gun violence"[mh] OR "Battered Women"[mh] OR "Adult Survivors of Child abuse"[mh] OR "Exposure to Violence"[mh] OR "Emotional Abuse"[mh] OR "Sexual Harassment"[mh] OR "Harassment, Non-Sexual"[mh:noexp] OR "Aggression"[mh:noexp] OR "Coercion"[Mesh] OR "Dehumanization"[mh] OR "stalking"[mh] OR "adverse childhood experiences"[mh] OR violence[tiab] OR "sexual assault"[tiab] OR "sexual harassment"[tiab] OR "sexual abuse"[tiab] OR "sex abuse"[tiab] OR rape[tiab] OR "forced sex"[tiab] OR "sexual coercion"[tiab] OR "reproductive coercion"[tiab] OR "sex trafficking"[tiab] OR "sexual exploitation"[tiab] OR "forced marriage"[tiab] OR "child marriage\*" [tiab] OR "early marriage\*" [tiab] OR "child bride\*" [tiab] OR CEFM[tiab] OR "female genital mutilation"[tiab] OR "female genital cutting"[tiab] OR "female circumcision"[tiab] OR "female genital circumcision"[tiab] OR infibulation\*[tiab] OR clitoridectom\*[tiab] OR clitorrectom\*[tiab] OR "ritual female genital surger\*" [tiab] OR FGM[tiab] OR "physical abuse"[tiab] OR "psychological abuse"[tiab] OR "emotional abuse"[tiab] OR "economic abuse"[tiab] OR "financial abuse"[tiab] OR "verbal abuse"[tiab] OR maltreatment[tiab] OR "violent discipline"[tiab] OR "corporal punishment"[tiab] OR "adverse childhood experience\*" [tiab] OR molestation[tiab] OR "child abuse"[tiab] OR "partner abuse"[tiab] OR "dating abuse"[tiab] OR "wife abuse"[tiab] OR "spouse abuse"[tiab] OR "domestic abuse"[tiab] OR "elder abuse"[tiab] OR "senior abuse"[tiab] OR "aged abuse"[tiab] OR victimization[tiab] OR dehumanization[tiab] OR victimisation[tiab] OR dehumanisation[tiab] OR stalking[tiab] OR cyberviolence[tiab] OR cybervictimization[tiab] OR cyberstalking[tiab])

AND

(Case-Control Studies[mh] OR Cross-Over Studies[mh] OR Cohort Studies[mh] OR Systematic Review[pt] OR Meta-Analysis[pt] OR "Twin Study"[pt] OR "systematic review"[tiab] OR "meta-analysis"[tiab] OR "cohort"[tiab] OR "cross-over"[tiab] OR "case-control"[tiab] OR "prospective"[tiab] OR "retrospective"[tiab] OR "longitudinal"[tiab] OR "follow-up"[tiab] OR "followup"[tiab])

AND

("Statistics as Topic"[mh] OR Risk[mh] OR Odds Ratio[mh] OR "risk\*" [tiab] OR "odds" [tiab] OR "cross-product ratio\*" [tiab] OR "hazards ratio\*" [tiab] OR "hazard ratio\*" [tiab] OR statistic\* [tiab] OR "HR" [tiab] OR "RR" [tiab] OR "aOR" [tiab] OR relation\* [tiab] OR correlat\* [tiab] OR associat\* [tiab] OR likel\* [tiab])

AND

("1970/01/01"[PDat] : "2023/01/31"[PDat])

#### Embase Search String

('sexual violence'/exp OR 'forced sex'/exp OR 'violence'/de OR 'domestic violence'/exp OR 'gender based violence'/exp OR 'partner violence'/exp OR 'dating violence'/exp OR 'physical abuse'/exp OR 'physical violence'/exp OR 'torture'/exp OR 'workplace violence'/exp OR 'gun violence'/exp OR 'battered woman'/exp OR 'child abuse survivor'/exp OR 'exposure to violence'/exp OR 'emotional abuse'/exp OR 'elderly abuse'/exp OR 'sexual harassment'/exp OR 'non-sexual harassment'/de OR 'aggression'/de OR 'verbal hostility'/exp OR 'coercion'/exp OR 'intimidation'/exp OR 'dehumanization'/exp OR 'stalking'/de OR 'childhood adversity'/exp OR 'maltreatment'/exp OR 'corporal punishment'/exp OR 'victimization'/exp OR (violence OR 'sexual assault' OR 'sexual harassment' OR 'sexual abuse' OR 'sex abuse' OR rape OR 'forced sex' OR 'sexual coercion' OR 'reproductive coercion' OR 'sex trafficking' OR 'sexual exploitation' OR 'forced marriage\*' OR 'child marriage\*' OR 'early marriage\*' OR 'child bride\*' OR CEFM OR 'female genital mutilation' OR 'female genital cutting' OR 'female circumcision' OR 'female genital circumcision' OR infibulation\* OR clitoridectom\* OR clitorectom\* OR 'ritual female genital surger\*' OR FGM OR 'physical abuse' OR 'psychological abuse' OR 'emotional abuse' OR 'economic abuse' OR 'financial abuse' OR 'verbal abuse' OR maltreatment OR 'violent discipline' OR 'corporal punishment' OR 'adverse childhood experience\*' OR molestation OR 'child abuse' OR 'partner abuse' OR 'dating abuse' OR 'wife abuse' OR 'spouse abuse' OR 'domestic abuse' OR 'elder abuse' OR 'senior abuse' OR 'aged abuse' OR victimization OR dehumanisation OR victimisation OR dehumanization OR stalking OR cyberviolence OR cybervictimization OR cyberstalking):ti,ab,kw)

AND

('case control study'/exp OR 'crossover procedure'/exp OR 'cohort analysis'/exp OR 'systematic review'/exp OR 'systematic review (topic)'/exp OR 'meta analysis'/exp OR 'meta analysis (topic)'/exp OR 'twin study'/exp OR ('systematic review' OR meta-analysis OR cohort OR cross-over OR case-control OR prospective OR retrospective OR longitudinal OR follow-up OR followup):ti,ab,kw)

AND

('statistics'/exp OR 'statistical parameters'/exp OR 'risk'/exp OR 'risk ratio'/exp OR 'correlation'/exp OR 'statistical analysis'/exp OR ('risk\*' OR 'odds' OR 'cross-product ratio\*' OR 'hazards ratio\*' OR 'hazard ratio\*' OR statistic\* OR 'HR' OR 'RR' OR 'aOR' OR relation\* OR correlat\* OR associat\* OR likel\*):ti,ab,kw)

AND

[1970-2023]/py

AND

[01-01-1970]/sd NOT [31-01-2023]/sd



## Cumulative Index to Nursing and Allied Health Literature (CINAHL) Search String

((MH ("Sexual Abuse+" OR "Violence" OR "Domestic Violence+" OR "Gender-Based Violence" OR "Circumcision, Female" OR "Dating Violence" OR "Torture" OR "Workplace Violence" OR "Gun Violence" OR "Battered Women" OR "Child Abuse Survivors" OR "Exposure to Violence" OR "Emotional Abuse" OR "Sexual Harassment" OR "Aggression" OR "Verbal Abuse" OR "Coercion" OR "Dehumanization" OR "Stalking" OR "Adverse Childhood Experiences" OR "Sibling Violence" OR "School Violence" OR "Student Abuse")) OR TI(violence OR "sexual assault" OR "sexual harassment" OR "sexual abuse" OR "sex abuse" OR rape OR "forced sex" OR "sexual coercion" OR "reproductive coercion" OR "sex trafficking" OR "sexual exploitation" OR "forced marriage" OR "child marriage\*" OR "early marriage\*" OR "child bride\*" OR CEFM OR "female genital mutilation" OR "female genital cutting" OR "female circumcision" OR "female genital circumcision" OR infibulation\* OR clitoridectom\* OR clitorrectom\* OR "ritual female genital surger\*" OR FGM OR "physical abuse" OR "psychological abuse" OR "emotional abuse" OR "economic abuse" OR "financial abuse" OR "verbal abuse" OR maltreatment OR "violent discipline" OR "corporal punishment" OR "adverse childhood experience\*" OR molestation OR "child abuse" OR "partner abuse" OR "dating abuse" OR "wife abuse" OR "spouse abuse" OR "domestic abuse" OR "elder abuse" OR "senior abuse" OR "aged abuse" OR victimization OR dehumanization OR victimisation OR dehumanisation OR stalking OR cyberviolence OR cybervictimization OR cyberstalking) OR AB(violence OR "sexual assault" OR "sexual harassment" OR "sexual abuse" OR "sex abuse" OR rape OR "forced sex" OR "sexual coercion" OR "reproductive coercion" OR "sex trafficking" OR "sexual exploitation" OR "forced marriage" OR "child marriage\*" OR "early marriage\*" OR "child bride\*" OR CEFM OR "female genital mutilation" OR "female genital cutting" OR "female circumcision" OR "female genital circumcision" OR infibulation\* OR clitoridectom\* OR clitorrectom\* OR "ritual female genital surger\*" OR FGM OR "physical abuse" OR "psychological abuse" OR "emotional abuse" OR "economic abuse" OR "financial abuse" OR "verbal abuse" OR maltreatment OR "violent discipline" OR "corporal punishment" OR "adverse childhood experience\*" OR molestation OR "child abuse" OR "partner abuse" OR "dating abuse" OR "wife abuse" OR "spouse abuse" OR "domestic abuse" OR "elder abuse" OR "senior abuse" OR "aged abuse" OR victimization OR dehumanization OR victimisation OR dehumanisation OR stalking OR cyberviolence OR cybervictimization OR cyberstalking))

AND

((MH ("Case Control Studies+" OR "Crossover Design" OR "Systematic Review" OR "Meta Analysis" OR "Prospective Studies+" OR "Retrospective Design")) OR TI("systematic review" OR meta-analysis OR cohort OR cross-over OR case-control OR prospective OR retrospective OR longitudinal OR follow-up OR followup) OR AB("systematic review" OR meta-analysis OR cohort OR cross-over OR case-control OR prospective OR retrospective OR longitudinal OR follow-up OR followup))

AND

((MH ("Statistics+" OR "Data Analysis, Statistical+")) OR TI(risk\* OR odds OR "cross-product ratio\*" OR "hazards ratio\*" OR "hazard ratio\*" OR statistic\* OR "HR" OR "RR" OR "aOR" OR relation\* OR correlat\* OR associat\* OR likel\*) OR AB(risk\* OR odds OR "cross-product ratio\*" OR "hazards ratio\*" OR "hazard ratio\*" OR statistic\* OR "HR" OR "RR" OR "aOR" OR relation\* OR correlat\* OR associat\* OR likel\*))

)

Limits: Publication Date: January 1970 – January 2023

## PsycINFO Search String

(DE("Sexual Violence" OR "Sex Offenses" OR "Sexual Abuse" OR "Sexual Coercion" OR "Sex Trafficking" OR "Violence" OR "Domestic Violence" OR "Child Abuse" OR "Elder Abuse" OR "Circumcision" OR "Intimate Partner Violence" OR "Dating Violence" OR "Physical Abuse" OR "Physical Discipline" OR "Punishment" OR "Rape" OR "Acquaintance Rape" OR "Torture" OR "Workplace Violence" OR "Gun Violence" OR "Battered Females" OR "Exposure to Violence" OR "Emotional Abuse" OR "Sexual Harassment" OR "Aggressive Behavior" OR "Verbal Abuse" OR "Coercion" OR "Stalking" OR "Childhood Adversity" OR "School Violence" OR "Police Violence" OR "Victimization")

OR

MA("Sex Offenses" OR "Domestic Violence" OR "Gender-Based Violence" OR "Intimate Partner Violence" OR "Physical Abuse" OR "Rape" OR "Torture" OR "Workplace Violence" OR "Gun violence" OR "Battered Women" OR "Adult Survivors of Child abuse" OR "Exposure to Violence" OR "Emotional Abuse" OR "Sexual Harassment" OR "Coercion" OR "Dehumanization" OR "stalking" OR "adverse childhood experiences")

OR

TI(violence OR "sexual assault" OR "sexual harassment" OR "sexual abuse" OR "sex abuse" OR rape OR "forced sex" OR "sexual coercion" OR "reproductive coercion" OR "sex trafficking" OR "sexual exploitation" OR "forced marriage\*" OR "child marriage\*" OR "early marriage\*" OR "child bride\*" OR CEFM OR "female genital mutilation" OR "female genital cutting" OR "female circumcision" OR "female genital circumcision" OR infibulation\* OR clitoridectom\* OR clitorectom\* OR "ritual female genital surger\*" OR FGM OR "physical abuse" OR "psychological abuse" OR "emotional abuse" OR "economic abuse" OR "financial abuse" OR "verbal abuse" OR maltreatment OR "violent discipline" OR "corporal punishment" OR "adverse childhood experience\*" OR molestation OR "child abuse" OR "partner abuse" OR "dating abuse" OR "wife abuse" OR "spouse abuse" OR "domestic abuse" OR "elder abuse" OR "senior abuse" OR "aged abuse" OR victimization OR dehumanization OR victimisation OR dehumanisation OR stalking OR cyberviolence OR cybervictimization OR cyberstalking)

OR

AB(violence OR "sexual assault" OR "sexual harassment" OR "sexual abuse" OR "sex abuse" OR rape OR "forced sex" OR "sexual coercion" OR "reproductive coercion" OR "sex trafficking" OR "sexual exploitation" OR "forced marriage\*" OR "child marriage\*" OR "early marriage\*" OR "child bride\*" OR CEFM OR "female genital mutilation" OR "female genital cutting" OR "female circumcision" OR "female genital circumcision" OR infibulation\* OR clitoridectom\* OR clitorectom\* OR "ritual female genital surger\*" OR FGM OR "physical abuse" OR "psychological abuse" OR "emotional abuse" OR "economic abuse" OR "financial abuse" OR "verbal abuse" OR maltreatment OR "violent discipline" OR "corporal punishment" OR "adverse childhood experience\*" OR molestation OR "child abuse" OR "partner abuse" OR "dating abuse" OR "wife abuse" OR "spouse abuse" OR "domestic abuse" OR "elder abuse" OR "senior abuse" OR "aged abuse" OR victimization OR dehumanization OR victimisation OR dehumanisation OR stalking OR cyberviolence OR cybervictimization OR cyberstalking)

OR

KW(violence OR "sexual assault" OR "sexual harassment" OR "sexual abuse" OR "sex abuse" OR rape OR "forced sex" OR "sexual coercion" OR "reproductive coercion" OR "sex trafficking" OR "sexual exploitation" OR "forced marriage\*" OR "child marriage\*" OR "early marriage\*" OR "child bride\*" OR CEFM OR "female genital mutilation" OR "female genital cutting" OR "female circumcision" OR "female genital circumcision" OR infibulation\* OR clitoridectom\* OR clitorectom\* OR "ritual female genital surger\*" OR FGM OR "physical abuse" OR "psychological abuse" OR "emotional abuse" OR "economic abuse" OR "financial abuse" OR "verbal abuse" OR maltreatment OR "violent discipline" OR "corporal punishment" OR "adverse childhood experience\*" OR molestation OR "child abuse" OR "partner abuse" OR "dating abuse" OR "wife abuse" OR "spouse abuse" OR "domestic abuse" OR "elder abuse" OR "senior abuse" OR "aged abuse" OR victimization OR dehumanization OR victimisation OR dehumanisation OR stalking OR cyberviolence OR cybervictimization OR cyberstalking))

AND

(DE("Cohort Analysis" OR "Followup Studies" OR "Longitudinal Studies" OR "Retrospective Studies" OR "Prospective Studies" OR "Systematic Review" OR "Meta Analysis"))

OR

MA("Case-Control Studies" OR "Cross-Over Studies" OR "Cohort Studies")

OR

TI("systematic review" OR meta-analysis OR cohort OR cross-over OR case-control OR prospective OR retrospective OR longitudinal OR follow-up OR followup)

OR

AB("systematic review" OR meta-analysis OR cohort OR cross-over OR case-control OR prospective OR retrospective OR longitudinal OR follow-up OR followup)

OR

KW("systematic review" OR meta-analysis OR cohort OR cross-over OR case-control OR prospective OR retrospective OR longitudinal OR follow-up OR followup))

AND

(DE("Statistics" OR "Statistical Analysis" OR "Risk Assessment" OR "Statistical Correlation"))

OR

MA("Statistics as Topic" OR Risk OR Odds Ratio)

OR

TI(risk\* OR odds OR "cross-product ratio\*" OR "hazards ratio\*" OR "hazard ratio\*" OR statistic\* OR "HR" OR "RR" OR "aOR" OR relation\* OR correlat\* OR associat\* OR likel\*)

OR

AB(risk\* OR odds OR "cross-product ratio\*" OR "hazards ratio\*" OR "hazard ratio\*" OR statistic\* OR "HR" OR "RR" OR "aOR" OR relation\* OR correlat\* OR associat\* OR likel\*)

OR

KW(risk\* OR odds OR "cross-product ratio\*" OR "hazards ratio\*" OR "hazard ratio\*" OR statistic\* OR "HR" OR "RR" OR "aOR" OR relation\* OR correlat\* OR associat\* OR likel\*)

Limits: Publication Date: January 1970 – January 2023

#### Global Index Medicus Search String

((mh:(I01.198.240.748\* OR Violence OR I01.198.240.856.350\* OR I01.198.240.856.463 OR I01.198.240.856.575\* OR I01.198.240.856.688 OR I01.198.240.748.640 OR I01.198.240.856.825 OR I01.198.240.856.912 OR I01.198.240.856.519 OR M01.975.155 OR M01.135.500 OR I01.880.735.900.869 OR I01.880.735.305 OR SP9.020.800.010 OR "Harassment, Non-Sexual" OR "Aggression" OR I01.880.604.316 OR Dehumanization OR F01.145.813.191\* OR I01.880.735.223.500 OR I01.880.735.035)) OR (ti:(violence OR "sexual assault" OR "sexual harassment" OR "sexual abuse" OR "sex abuse" OR rape OR "forced sex" OR "sexual coercion" OR "reproductive coercion" OR "sex trafficking" OR "sexual exploitation" OR "forced marriage" OR "forced marriages" OR "child marriage" OR "child marriages" OR "early marriage" OR "early marriages" OR "child bride" OR "child brides" OR CEFM OR "female genital mutilation" OR "female genital cutting" OR "female circumcision" OR "female genital circumcision" OR infibulation\* OR clitoridectom\* OR clitorectom\* OR "ritual female genital surgery" OR "ritual female genital surgeries" OR FGM OR "physical abuse" OR "psychological abuse" OR "emotional abuse" OR "economic abuse" OR "financial abuse" OR "verbal abuse" OR maltreatment OR "violent discipline" OR "corporal punishment" OR "adverse childhood experience" OR "adverse childhood experiences" OR molestation OR "child abuse" OR "partner abuse" OR "dating abuse" OR "wife abuse" OR "spouse abuse" OR "domestic abuse" OR "elder abuse" OR "senior abuse" OR "aged abuse" OR victimization OR dehumanization OR victimisation OR dehumanisation OR stalking)) OR (ab:(violence OR "sexual assault" OR "sexual harassment" OR "sexual abuse" OR "sex abuse" OR rape OR "forced sex" OR "sexual coercion" OR "reproductive coercion" OR "sex trafficking" OR "sexual exploitation" OR "forced marriage" OR "forced marriages" OR "child marriage" OR "child marriages" OR "early marriage" OR "early marriages" OR "child bride" OR "child brides" OR CEFM OR "female genital mutilation" OR "female genital cutting" OR "female circumcision" OR "female genital circumcision" OR infibulation\* OR clitoridectom\* OR clitorectom\* OR "ritual female genital surgery" OR "ritual female genital surgeries" OR FGM OR "physical abuse" OR "psychological abuse" OR "emotional abuse" OR "economic abuse" OR "financial abuse" OR "verbal abuse" OR maltreatment OR "violent discipline" OR "corporal punishment" OR "adverse childhood experience" OR "adverse childhood experiences" OR molestation OR "child abuse" OR "partner abuse" OR "dating abuse" OR "wife abuse" OR "spouse abuse" OR "domestic abuse" OR "elder abuse" OR "senior abuse" OR "aged abuse" OR victimization OR dehumanization OR victimisation OR dehumanisation OR stalking OR cyberviolence OR cybervictimization OR cyberstalking)))

AND

((mh:(E05.318.372.500.500\* OR E05.318.370.150 OR E05.318.372.500.750\* OR V03.850 OR L01.178.682.759.575 OR V03.600 OR E05.318.370.500\* OR V03.900)) OR (ti:( "systematic review" OR "meta-analysis" OR cohort OR "cross-over" OR "case-control" OR Prospective OR retrospective OR longitudinal OR "follow-up" OR followup)) OR (ab:( "systematic review" OR "meta-analysis" OR cohort OR "cross-over" OR "case-control" OR Prospective OR retrospective OR longitudinal OR "follow-up" OR followup)))

AND

((mh:9E05.318.740\* OR E05.318.740.600.800\* OR E05.318.740.600.600)) OR (ti:( risk\* OR odds OR "cross-product ratio" OR "cross-product ratios" OR "hazards ratio" OR "hazards ratios" OR "hazard ratio" OR "hazard ratios" OR statistic\* OR "HR" OR "RR" OR "aOR" OR relation\* OR correlat\* OR associat\* OR likel\*) OR (ab:(risk\* OR odds OR "cross-product ratio" OR "cross-product ratios" OR "hazards ratio" OR "hazards ratios" OR "hazard ratio" OR "hazard ratios" OR statistic\* OR "HR" OR "RR" OR "aOR" OR relation\* OR correlat\* OR associat\* OR likel\*)))

)

AND

(year\_cluster:[1970 TO 2023])

#### Cochrane Search String

([mh "Sex Offenses"] OR [mh ^"Violence"] OR [mh "Domestic Violence"] OR [mh "Gender-Based Violence"] OR [mh "Intimate Partner Violence"] OR [mh "Physical Abuse"] OR [mh "Rape"] OR [mh "Torture"] OR [mh "Workplace Violence"] OR [mh "Gun violence"] OR [mh "Battered Women"] OR [mh "Adult Survivors of Child abuse"] OR [mh "Exposure to Violence"] OR [mh "Emotional Abuse"] OR [mh "Sexual Harassment"] OR [mh ^"Harassment, Non-Sexual"] OR [mh ^"Aggression"] OR [mh "Coercion"] OR [mh "Dehumanization"] OR [mh "stalking"] OR [mh "adverse childhood experiences"] OR (violence OR "sexual assault" OR "sexual harassment" OR "sexual abuse" OR "sex abuse" OR rape OR "forced sex" OR "sexual coercion" OR "reproductive coercion" OR "sex trafficking" OR "sexual exploitation" OR ((forced OR child OR early) NEXT marriage\*) OR (child NEXT bride\*) OR CEFM OR "female genital mutilation" OR "female genital cutting" OR "female circumcision" OR "female genital circumcision" OR infibulation\* OR clitoridectom\* OR clitorectom\* OR "ritual female genital surgery" OR "ritual female genital surgeries" OR FGM OR ((physical OR psychological OR emotional OR economic OR financial OR verbal) NEXT abuse) OR maltreatment OR "violent discipline" OR "corporal punishment" OR "adverse childhood experience" OR "adverse childhood experiences" OR molestation OR "child abuse" OR "partner abuse" OR "dating abuse" OR "wife abuse" OR "spouse abuse" OR "domestic abuse" OR "elder abuse" OR "senior abuse" OR "aged abuse" OR victimization OR dehumanization OR victimisation OR dehumanisation OR stalking OR cyberviolence OR cybervictimization OR cyberstalking):ti,ab,kw)

AND

([mh "Case-Control Studies"] OR [mh "Cross-Over Studies"] OR [mh "Cohort Studies"] OR [mh "Systematic Review"] OR [mh "Meta-Analysis"] OR [mh "Twin Study"] OR ("systematic review" OR "meta-analysis" OR "cohort" OR "cross-over" OR "case-control" OR "prospective" OR "retrospective" OR "longitudinal" OR "follow-up" OR "followup"):ti,ab,kw)

AND

([mh "Statistics as Topic"] OR [mh Risk] OR [mh "Odds Ratio"] OR ("risk" OR "odds" OR "cross-product ratio" OR "cross-product ratios" OR "hazards ratio" OR "hazards ratios" OR "hazard ratio" OR "hazard ratios" OR statistic\* OR "HR" OR "RR" OR "aOR" OR relation\* OR correlat\* OR associat\* OR likel\*):ti,ab,kw)

Limits: January 1970 – January 2023

## Web of Science Core Collection Search String

(TS=(

(violence OR "sexual assault" OR "sexual harassment" OR "sexual abuse" OR "sex abuse" OR rape OR "forced sex" OR "sexual coercion" OR "reproductive coercion" OR "sex trafficking" OR "sexual exploitation" OR "forced marriage\*" OR "forced marriage\*" OR "child marriage\*" OR "early marriage\*" OR "child bride\*" OR CEFM OR "female genital mutilation" OR "female genital cutting" OR "female circumcision" OR "female genital circumcision" OR infibulation\* OR clitoridectom\* OR clitorectom\* OR "ritual female genital surger\*" OR FGM OR "physical abuse" OR "psychological abuse" OR "emotional abuse" OR "economic abuse" OR "financial abuse" OR "verbal abuse" OR Maltreatment OR torture OR "violent discipline" OR "corporal punishment" OR "adverse childhood experience\*" OR molestation OR "child abuse" OR "partner abuse" OR "dating abuse" OR "wife abuse" OR "battered wom\*n" OR "spouse abuse" OR "domestic abuse" OR "elder abuse" OR "senior abuse" OR "aged abuse" OR victimization OR dehumanization OR victimisation OR dehumanisation OR stalking OR cyberviolence OR cybervictimization OR cyberstalking)

AND

("systematic review" OR "meta-analysis" OR cohort OR cross-over OR case-control OR prospective OR retrospective OR longitudinal OR follow-up OR followup)

AND

("risk\*" OR "odds" OR "cross-product ratio\*" OR "hazards ratio\*" OR "hazard ratio\*" OR statistic\* OR "HR" OR "RR" OR "aOR" OR relation\* OR correlat\* OR associat\* OR likel\*)

))

AND

DOP=(1970-01-01/2023-01-31)

## Section 4.2: Inclusion and Exclusion Criteria

We used the criteria listed below to title and abstract screen 67,221 identified articles. Each review step (title/abstract screening, full-text screening, and data extraction) began with consensus building exercises across the review team. After training and consensus-building, the first two-thirds of titles/abstracts were reviewed by two independent reviewers, with conflicts resolved by project leaders. Upon confirmation of a low rate of total conflicts (<5% of total screened), the remainder of titles/abstracts were single screened. Non-English articles were screened by reviewers with proficiency in the language. Studies which met inclusion criteria during title/abstract screening (n = 4379) were full text screened and excluded if found to meet any exclusion criteria. Two independent reviewers full text screened 10% of articles, with conflicts resolved by project leads. Upon confirming a low conflict rate (<5%), the remaining 90% of articles were single screened.

## Inclusion Criteria

**Study design:** case–control, cohort, or case-crossover studies.

**Participants:** Studies conducted in participant groups likely to be generalizable to the population of interest. Exposed groups are defined as any individual who has experienced a form of GBV and/or VAC throughout the lifetime. Comparators will be non-exposed control groups, or study groups without reported exposure to a form of GBV and/or VAC.

**Outcomes:** Studies reporting an estimate of association (either RR, risk ratio, odds ratio, hazard ratio or similar) or reporting cases and non-cases among those exposed and unexposed. If not provided directly, studies providing enough information to allow an estimate of RR to be calculated will meet inclusion criteria.

## Exclusion criteria

**Study design:** Cross-sectional, ecological, case series or case studies.

**Participants:** Studies conducted in subgroups identified only by convenience sampling or subgroups identified via a shared characteristic that is likely related to risk of exposure to violence or the reported health outcome (e.g., domestic violence shelter residents).

**Exposure measurement:** Studies that report only an aggregate measure of exposure combining exposure to a form of violence with other, non-eligible exposures (e.g., reports a composite ACE score only) will be excluded. For these studies, we are unable to disentangle the effect of violence exposure from the effects of other hardships or exposure types, preventing their inclusion in our review.

**Does not meet minimum reporting criteria:** Studies missing essential data, that is, those that do not report effect sizes and uncertainty information (confidence intervals, sample sizes) or the data needed to impute an effect size with uncertainty information.

### Section 4.3: Systematic review and meta-analysis citation searching

We title and abstract and full text screened systematic reviews and/or meta-analyses yielded by our searches according to the criteria outlined for all other articles. In total, we accepted 771 systematic reviews and/or meta-analyses during title/abstract screening. Of these, we accepted 267 in full-text screening.

We then grouped accepted systematic reviews/meta-analyses by unique risk-outcome pair combination (e.g., IPV-anxiety disorders; CSA-alcohol use disorders) in order to extract the citations identified by these reviews. If more than one systematic review was identified for a given risk-outcome pair, one systematic review was selected for citation searching on the basis of publication recency, number of included underlying studies and study quality. Study quality was determined via adherence to PRISMA and GATHER guidelines and by the impact factor of the journal the study was published within.

Once a single systematic review was selected for citation searching per unique risk-outcome pair, we extracted the references identified within each review and de-duplicated them against our primary search records. All new articles from this search were then screened for inclusion with the same criteria as in our larger review (see supplementary section 4.2).

Across all risk outcome pairs, we extracted 1202 articles, 584 of which were not duplicated with our own search records. We accepted 207 articles in title/abstract screening and 38 articles in full-text screening. Thus, this citation-searching step of our review yielded 38 new studies for extraction.

### Section 4.4: Data Extraction

All studies were extracted using a modified data extraction template in Covidence data extraction 2.0. Table S20 details the fields extracted for each article.

Table S20: Data Extraction Template

| Name              |                      | Definition                                                                                                                                          |
|-------------------|----------------------|-----------------------------------------------------------------------------------------------------------------------------------------------------|
| Study locations   | Location Name        | The country or IHME sub-national location where the study took place                                                                                |
|                   | Location ID          | The location ID corresponding to the country or IHME sub-national location of the study                                                             |
| Specific Location |                      | Required if the study took place in a location smaller than the corresponding location name and ID                                                  |
| Study Name        |                      | Required if cohort is named, do not use the article title. This field is used to screen out duplicative data, so please ensure spelling is correct. |
| Year Start        |                      | Year the study started                                                                                                                              |
| Year End          |                      | Year the study ended (NOT publication year)                                                                                                         |
| Study Design      | Prospective cohort   | Must select one                                                                                                                                     |
|                   | Retrospective cohort |                                                                                                                                                     |



|                                                                               |                                                                                                                                                                                                                                                                                    |  |
|-------------------------------------------------------------------------------|------------------------------------------------------------------------------------------------------------------------------------------------------------------------------------------------------------------------------------------------------------------------------------|--|
|                                                                               | Case-control                                                                                                                                                                                                                                                                       |  |
|                                                                               | Case-cohort                                                                                                                                                                                                                                                                        |  |
|                                                                               | Case-crossover                                                                                                                                                                                                                                                                     |  |
| <b>Pooled cohort</b>                                                          | Cohort studies only: Yes if the reported effect size is from a pooled analysis and only pooled effect size has been reported, otherwise no                                                                                                                                         |  |
| <b>Study Selection Criteria</b>                                               | Please specify the selection criteria of the study that is used in the analysis                                                                                                                                                                                                    |  |
| <b>Location Representative</b>                                                | Specify if the participants were representative of the study's geography or not                                                                                                                                                                                                    |  |
| <b>Cohort Study: Drop-out rate</b>                                            | Study dropout rate (%) at the end of the study entered as a decimal                                                                                                                                                                                                                |  |
| <b>Cohort Study: Drop-out rate assessment</b>                                 | Specify how dropout rate was defined in the study.                                                                                                                                                                                                                                 |  |
| <b>Cohort Study: Follow-up measure</b>                                        | Cohort studies only: Type of follow up measure reported (eg, 'average participant follow-up was 126 days' then select 'mean').                                                                                                                                                     |  |
| <b>Cohort Study: Follow-up units</b>                                          | Cohort studies only: enter units of follow-up duration reported (eg, 'average participant follow-up was 126 days' then enter 'days').                                                                                                                                              |  |
| <b>Cohort Study: Follow-up value</b>                                          | Cohort studies only: Enter the length of participant follow-up if reported (eg, 'average participant follow-up was 126 days' then enter 126).                                                                                                                                      |  |
| <b>Case-control Study: Percent of participants for which data ascertained</b> | Percent of participants (%) from total, for which the study has included data entered as a decimal                                                                                                                                                                                 |  |
| <b>Case-control Study: Controls selected from community</b>                   | Were the controls selected from the community? Yes or No                                                                                                                                                                                                                           |  |
| <b>Exposure assessment method</b>                                             | Self-report, routinely collected/ administrative data, clinical examination                                                                                                                                                                                                        |  |
| <b>Exposure assessment instrument</b>                                         | Specify the name of the exposure assessment instrument. For self-reported exposures, please specify the name of the questionnaire. If more than one instrument, specify all. If the instrument is not names/designed specifically for the study, write "study-specific instrument" |  |
| <b>Exposure assessment period</b>                                             | How many times information on exposure to type of violence                                                                                                                                                                                                                         |  |
| <b>Exposure assessment value</b>                                              | If "exposure assessment period" is multiple, specify the number of times that exposure was assessed (excluding baseline)                                                                                                                                                           |  |
| <b>Outcome assessment method</b>                                              | Select how the study ascertained which participants experienced the outcome                                                                                                                                                                                                        |  |
| <b>Outcome assessment instrument</b>                                          | Specify the name of the outcome assessment instrument. For self-reported outcomes, please specify the name of the questionnaire. If more than one instrument, specify all. If the instrument is not names/designed specifically for the study, write "study-specific instrument"   |  |
| <b>Effect size measure</b>                                                    | Select the form of effect size used in the study                                                                                                                                                                                                                                   |  |

|                                  |                                                                                                                                                                                                                                                                                                                                                                                                                                                                                                                                                                                                                                                                                                                          |
|----------------------------------|--------------------------------------------------------------------------------------------------------------------------------------------------------------------------------------------------------------------------------------------------------------------------------------------------------------------------------------------------------------------------------------------------------------------------------------------------------------------------------------------------------------------------------------------------------------------------------------------------------------------------------------------------------------------------------------------------------------------------|
| <b>Uncertainty type</b>          |                                                                                                                                                                                                                                                                                                                                                                                                                                                                                                                                                                                                                                                                                                                          |
| <b>Confidence interval level</b> | If uncertainty is reported as a confidence interval, this column represents the confidence level which is reported at (Eg. 95, 90, 99).                                                                                                                                                                                                                                                                                                                                                                                                                                                                                                                                                                                  |
| <b>Extractor notes</b>           | Please use this field to include any notes about the study or your extraction not covered elsewhere.                                                                                                                                                                                                                                                                                                                                                                                                                                                                                                                                                                                                                     |
| <b>Outcome name</b>              | Outcome that is measured in this model                                                                                                                                                                                                                                                                                                                                                                                                                                                                                                                                                                                                                                                                                   |
| <b>Outcome type</b>              | Please specify if the outcome definition included incidence of or mortality from a disease endpoint.                                                                                                                                                                                                                                                                                                                                                                                                                                                                                                                                                                                                                     |
| <b>Outcome definition</b>        | Please specify the definition for the outcome as reported in the study.                                                                                                                                                                                                                                                                                                                                                                                                                                                                                                                                                                                                                                                  |
| <b>Exposure definition</b>       | Please specify the definition for the exposed participants exactly as reported in the study.                                                                                                                                                                                                                                                                                                                                                                                                                                                                                                                                                                                                                             |
| <b>Exposed level</b>             | Enter level of exposure defined for exposed group. If study's exposure is binary (any vs. none), select 'any exposure' for exposed. For all other exposure levels, select other and enter level as reported (eg, 'exposed 3-5 times').                                                                                                                                                                                                                                                                                                                                                                                                                                                                                   |
| <b>Unexposed definition</b>      | Provide a brief description of the unexposed group (i.e., the comparison group) as used in estimation of the relative risk                                                                                                                                                                                                                                                                                                                                                                                                                                                                                                                                                                                               |
| <b>Unexposed level</b>           | Enter level of exposure defined for unexposed (comparator group). If the study's exposure is binary (any vs. none), select 'no exposure' for unexposed. For all other exposure levels, select other and enter level as reported (eg, 'exposed 1-2 times').                                                                                                                                                                                                                                                                                                                                                                                                                                                               |
| <b>Violence type</b>             | Select all violence types included for this model                                                                                                                                                                                                                                                                                                                                                                                                                                                                                                                                                                                                                                                                        |
| <b>Violence type combination</b> | Select HOW the violence types are combined in the model.<br>(1) AND: the model must specify that the exposure group experienced BOTH/ALL types of violence selected in the previous question<br>(2) AND/OR: the exposure group consists of people who experience EITHER type of violence<br>(3) ONLY: model specifies that the exposure group experienced selected violence type, but not other types of violence included in the study.<br><br><i>NOTE: Use 'only' option when it has been confirmed that is the ONLY type of violence a participant experienced (eg, experienced sexual but NOT physical violence). Otherwise, if one type of violence assessed and exposure to others are unknown, use 'unknown'.</i> |
| <b>Perpetrator type</b>          | Select all perpetrator types included in this model                                                                                                                                                                                                                                                                                                                                                                                                                                                                                                                                                                                                                                                                      |
| <b>Temporality of Exposure</b>   | <b>Lower (Age)</b><br>Lower bound of age range provided of when participants experienced violence. If no lower age is provided, fill in this box with '0' and provide more information in the "other information" question for this model (e.g. "temporality of exposure defined as "Childhood and adolescence")                                                                                                                                                                                                                                                                                                                                                                                                         |

|                                    |                                     |                                                                                                                                                                                                                                                                                                                                                                                                                                                  |
|------------------------------------|-------------------------------------|--------------------------------------------------------------------------------------------------------------------------------------------------------------------------------------------------------------------------------------------------------------------------------------------------------------------------------------------------------------------------------------------------------------------------------------------------|
|                                    | <b>Upper (Age)</b>                  | Upper bound of age range provided of when participants experienced violence. If no upper age is provided, fill in this box with "99" and provide more information in the "other information" question for this model (e.g. "temporality of exposure defined as "Childhood and adolescence")                                                                                                                                                      |
| <b>Exposure Recall Type</b>        |                                     | Specify whether the exposure occurred throughout lifetime, past year, or indicate other recall type.                                                                                                                                                                                                                                                                                                                                             |
| <b>Percent Women or Female</b>     |                                     | For the sample of this model, what percent are female or women (0-1) on a per 1 basis (eg, 43% female should be recorded as 0.43). Enter 1 if sample is only female. Enter 0 if sample is only male. If sample includes both sexes or genders and percent female not reported, enter 99.                                                                                                                                                         |
| <b>Ages</b>                        | <b>Lower</b>                        | Lower bound of age of participants included in this model at time of study. If the model includes participants of all ages from the study, this box will match the lower age box in section 2.                                                                                                                                                                                                                                                   |
|                                    | <b>Upper</b>                        | Upper bound of age of participants included in this model at time of study. If the model includes participants of all ages from the study, this box will match the upper age box in section 2.                                                                                                                                                                                                                                                   |
|                                    | <b>Mean</b>                         | Mean of age of participants included in this model.                                                                                                                                                                                                                                                                                                                                                                                              |
|                                    | <b>SD</b>                           | SD of age of participants included in this model.                                                                                                                                                                                                                                                                                                                                                                                                |
| <b>Subgroup analysis</b>           |                                     | <b>PER UNIQUE RISK-OUTCOME PAIR IN A STUDY:</b> Yes if this effect size is a sub-analysis reported IN ADDITION TO a main analysis from all participants (eg, study reports effect size for combined sexes and also effect sizes separately for males and females). If study only reports effect sizes from specific subgroups (eg, reports effect sizes from males and females separately, without reporting a combined effect size), select no. |
| <b>Subgroup analysis free text</b> |                                     | If a sub-analysis, describe stratifier (i.e. age, sex, etc.)                                                                                                                                                                                                                                                                                                                                                                                     |
| <b>Effect size</b>                 | <b>Mean</b>                         | Mean effect size of model                                                                                                                                                                                                                                                                                                                                                                                                                        |
|                                    | <b>Lower (UI)</b>                   | Lower bound of effect size                                                                                                                                                                                                                                                                                                                                                                                                                       |
|                                    | <b>Upper (UI)</b>                   | Upper bound of effect size                                                                                                                                                                                                                                                                                                                                                                                                                       |
|                                    | <b>Other uncertainty value</b>      |                                                                                                                                                                                                                                                                                                                                                                                                                                                  |
| <b>Effect size table #</b>         |                                     | Table number where you found effect size from literature                                                                                                                                                                                                                                                                                                                                                                                         |
| <b>Sample size</b>                 | <b>Number of cases</b>              | Enter number of participants with measured outcome for each group reported: exposed, unexposed, total                                                                                                                                                                                                                                                                                                                                            |
|                                    | <b>Number of participants</b>       | Enter number of participants included in analysis for each group reported: exposed, unexposed, total                                                                                                                                                                                                                                                                                                                                             |
|                                    | <b>Person-time (cohort studies)</b> | Enter person-time for each group reported: exposed, unexposed, total                                                                                                                                                                                                                                                                                                                                                                             |

|                                           |                                                                                                                                      |
|-------------------------------------------|--------------------------------------------------------------------------------------------------------------------------------------|
| <b>Person-time units (cohort studies)</b> | If cohort study and person-time entered into sample size table, specify the units of person-time reported                            |
| <b>Confounders</b>                        | Select all confounders for the most adjusted model, write in any confounders (separated by comma) not included in pre-specified list |
| <b>Other information</b>                  | Any additional information                                                                                                           |

## Section 4.5: Exposure and Outcome Definitions

The exposures examined in this review were defined in accordance with the risk factor definitions used in the GBD study (Table S21).

In forming our input datasets for IPV models, we accepted author definitions of IPV exposure matching the GBD case definition (i.e., physical and/or IPV), those which measured physical IPV only, and those which measured sexual IPV only. Due to data sparsity, we additionally accepted studies with author definitions which included psychological violence in addition to physical and/or sexual (i.e., defined exposure as any intimate partner violence involving physical, sexual, and/or psychological abuse). Potential bias due to using an accepted alternate exposure definition was accounted for in our modeling process via two study-level bias covariates marking component exposure definitions and aggregate exposure definitions (i.e., those including psychological violence). We did not include author definitions measuring psychological IPV only, economic/financial IPV only, nor those reporting aggregate definitions incorporating economic IPV.

In forming our input datasets for CSA models, we accepted author definitions of CSA exposure using any age threshold  $\leq 18$  years by any perpetrator. The GBD case definition considers sexual abuse less than 15 years old; for definitions which used alternate ages of exposure, we incorporated a study-level bias covariate to test the impact of setting different upper bounds of the ages which constitute childhood. In addition, certain studies measured CSA perpetrated in the context of specific relationships (i.e., family member-perpetrated CSA); estimates from these studies were marked with a bias covariate indicating that a restricted perpetrator definition was used.

Table S21: Definitions of included risk factors.

| Risk factor name                 | Definition                                                                                                                                                                                                             |
|----------------------------------|------------------------------------------------------------------------------------------------------------------------------------------------------------------------------------------------------------------------|
| <b>Intimate partner violence</b> | Lifetime prevalence of physical and/or sexual violence by a current or former intimate partner since age 15                                                                                                            |
| <b>Childhood sexual abuse</b>    | Lifetime prevalence of intercourse or other contact abuse (i.e., fondling or other sexual touching) when aged 15 years or younger in which the contact was unwanted, or perpetrator was 5+ years older than the victim |

The outcomes examined in this review were defined in accordance with the cause definitions used in the GBD study (Table S22). We followed cause-specific research team guidance to accept GBD reference and alternate case definitions. For accepted alternate case definitions, we incorporated study-level bias covariates to detect if the use of an alternate definitions significantly biased final model results.

Table S22: Definitions of included outcomes.

| Cause Grouping                 | Cause Name                | Definition                                                                                                                                                                                                                        |
|--------------------------------|---------------------------|-----------------------------------------------------------------------------------------------------------------------------------------------------------------------------------------------------------------------------------|
| <b>Mental health disorders</b> | Major depressive disorder | Major depressive disorder assessed according to DSM-4 (296.21–24, 296.31–34) and ICD-10 criteria (F32.0–9, F33.0–9). Diagnostic interviews and symptom scales were accepted according to the GBD criteria (Supplemental Table 4). |

|                                                     |                                               |                                                                                                                                                                                                                                                                                                                               |
|-----------------------------------------------------|-----------------------------------------------|-------------------------------------------------------------------------------------------------------------------------------------------------------------------------------------------------------------------------------------------------------------------------------------------------------------------------------|
|                                                     | Anxiety disorders                             | Anxiety disorders involving experiences of intense fear and distress in combination with other physiological symptoms.                                                                                                                                                                                                        |
|                                                     | Conduct disorder                              | Conduct disorder occurs in those under 18 years of age and incorporates disability from antisocial behavior that violates basic rights of others or major age-appropriate societal norms. DSM-IV-TR (312.81–312.89) and ICD-10 (F91) diagnostic criteria were used.                                                           |
|                                                     | Bulimia nervosa                               | Bulimia nervosa is an eating disorder, incorporating deaths and disability from recurrent binge eating, inappropriate compensatory behavior to prevent weight gain, and undue influence of body shape and weight on self-evaluation. DSM and ICD diagnostic criteria were used.                                               |
|                                                     | Anorexia nervosa                              | Anorexia nervosa is an eating disorder incorporating deaths and disability from refusal to maintain minimally normal body weight, intense fear of gaining weight, and disturbances in how one’s body weight or shape is experienced. DSM and ICD diagnostic criteria were used.                                               |
|                                                     | Schizophrenia                                 | Schizophrenia is a chronic psychotic disorder that involves positive symptoms (eg, delusions, hallucinations) and negative symptoms (eg, flat affect, loss of interest). DSM-IV-TR (295.10–295.30, 295.60, 295.90) and ICD-10 (F20) criteria were used.                                                                       |
| <b>Substance use disorders</b>                      | Alcohol use disorder                          | A maladaptive pattern of substance use, leading to clinically significant impairment or distress, as manifested by three (or more) of the DSM-4 criteria for substance dependence occurring any time in a 12-month period.                                                                                                    |
|                                                     | Drug use disorders                            | This aggregate cause incorporates death and disability resulting from opioid use disorder, amphetamine use disorder, cocaine use disorder, cannabis use disorder, and a residual category of other drug use disorders including deaths and disability due to dependence on hallucinogens, inhalants, solvents, and sedatives. |
| <b>Maternal disorders</b>                           | Maternal abortion and miscarriage             | Abortion is defined as elective or medically indicated termination of pregnancy at any gestational age and miscarriage is defined as spontaneous loss of pregnancy before 24 weeks of gestation with complications requiring medical care.                                                                                    |
| <b>HIV/AIDS and Sexually Transmitted Infections</b> | HIV/AIDS                                      | HIV/AIDS as assessed by biomarker tests.                                                                                                                                                                                                                                                                                      |
|                                                     | Sexually transmitted infections excluding HIV | Sexually transmitted infections are viral, bacterial, or parasitic infections that are transmitted through sexual contact. This aggregate group includes syphilis, chlamydia, gonorrhea, genital herpes, trichomoniasis,                                                                                                      |

|                                     |                          |                                                                                                                                                                                                                                                                                                 |
|-------------------------------------|--------------------------|-------------------------------------------------------------------------------------------------------------------------------------------------------------------------------------------------------------------------------------------------------------------------------------------------|
|                                     |                          | and a residual category of other sexually transmitted infections including chancroid, granuloma inguinale, and unspecified sexually transmitted diseases.                                                                                                                                       |
| <b>Injuries</b>                     | Self-harm                | Self-harm is deliberate bodily damage inflicted on oneself resulting in death or injury (ICD-9: E950–E959, ICD-10: X60–X64.9, X66–X84.9, Y87.0).                                                                                                                                                |
| <b>Chronic respiratory diseases</b> | Asthma                   | Asthma is a chronic lung disease characterized by reversible airway obstruction due to spasms and secretions in the bronchi usually resulting from an allergic reaction or hypersensitivity and causing difficulty in breathing.                                                                |
| <b>Diabetes and kidney diseases</b> | Type 2 diabetes mellitus | Type 2 diabetes is a chronic condition, mostly in adults, where the body forms a resistance to insulin or the pancreas stops producing enough insulin. GBD defines type 2 diabetes as fasting plasma glucose of at least 7 mmol/L (126 mg/dL) or those currently treated with drugs or insulin. |
| <b>Cardiovascular diseases</b>      | Ischemic heart disease   | Ischemic heart disease is a disease of the coronary arteries, usually from atherosclerosis, leading to myocardial infarction or ischemia, following the Fourth Universal Definition of Myocardial Infarction and, for stable angina, physician diagnosis.                                       |

Section 4.5.1: Additional description of accepted definitions and measurement tools for depressive and anxiety disorders

For depressive and anxiety disorders specifically, we received an inventory of acceptable diagnostic interview and symptom scales from the mental health research team at IHME. These tools have been reviewed in terms of their validity and specificity to measuring the symptoms of these specific disorders. We included studies using accepted diagnostic interviews (reference) or symptom scales (accepted alternate). A list of acceptable tools is included below. Studies using symptom scales were marked with a study-level bias covariate.

For other mental disorders, we followed GBD case definitions and accepted studies measuring outcomes by use of International Disease Classification and Diagnostic and Statistical Manual of Mental Disorder criteria.

Depressive and anxiety disorder accepted diagnostic interview and symptom scale measurement tools.

**List of accepted diagnostic interview tools (reference method of measurement)**

- Structured Clinical Interview for DSM-IV Axis Disorders (SCID-I) (1 month, lifetime)
- Structured Clinical Interview for DSM-IV-TR Research Version, Non-patient edition (SCID-I/NP).
- Schedules for Clinical Assessment in Neuropsychiatry (SCAN)
- Mini International Neuropsychiatric Interview (MINI) (2 weeks, 2Y dysthymia)
- Mini International neuro-psychiatric Interview for children and Adolescents (MINI-KID)
- Diagnostic Interview Schedule (DIS) or Diagnostic Interview Schedule-IV (DIS-IV)
- Chinese modified Diagnostic Interview Schedule (DIS-CM)
- Composite International Diagnostic Interview (CIDI) (1 year, lifetime)
- University of Michigan Composite International Diagnostic Interview (UM-CIDI)

- Korean version of the Composite International Diagnostic Interview (K-CIDI)
- Munich-Composite International Diagnostic Interview (M-CIDI)
- Geriatric Mental State Schedule (GMS) (1 month) - AGE-CAT (Automated Geriatric Examination for Computer Assisted Taxonomy)
- Primary Care Evaluation of Mental Disorders (PRIME-MD)
- Development and Well-Being Assessment (DAWBA)
- Schedule for Affective Disorders and Schizophrenia (SADS)
- Kiddie Schedule for Affective Disorders and Schizophrenia (K-SADS-PL)
- Comprehensive Psychopathological Rating Scale (CPRS)
- The Alcohol Use Disorder and Associated Disabilities Interview Schedule-IV (AUDADIS-IV) (1 year, lifetime)
- Diagnostic Interview for Children and Adolescents (DICA)
- SPIKE interview
- Clinical Interview Schedule-Revised (CIS-R) (1 week)
- Diagnostic Interview Schedule for Children Version IV (DISC)
- Diagnostic interview schedule for children-young child version (DISC-YC)
- Diagnostic Interview Schedule for Children, Parent Report (DISC-P)
- Present state examination (PSE)
- Child and adolescent psychiatric assessment (CAPA)
- Preschool age psychiatric assessment (PAPA)
- Children's Depression Rating Scale—Revised (CDRS-R)

**List of accepted symptom scale tools (alternate method of measurement)**

- Patient Health Questionnaire (PHQ)
- Revised Brief Patient Health Questionnaire (Brief PHQ-R)
- Beck Depression Inventory (BDI)
- Center for Epidemiologic Studies Depression Scale (CES-D)
- Center for Epidemiologic Studies Depression Scale for Children (CES-DC)
- Hospital Anxiety and Depression Scale (HADS)
- Depression Anxiety Stress Scale (DASS)
- Reynolds Adolescent Depression Scale (RADS)
- Child Depression Inventory (CDI)
- Duke Anxiety-Depression scale (DUKE-AD)
- Emotional State Questionnaire (EST-Q)
- Hopkins Symptom Checklist (HSCL) -DMI (25 items)
- Health & Daily Living Form (HDL)
- Child behavior checklist (CBCL)
- Hamilton depression rating scale (HAM-D)
- Harvard Department of Psychiatry National Depression Screening Day Scale (HANDS)
- Children's Depression Scale (CDS)
- Major Depression Inventory (MDI)
- Quick Inventory of Depressive Symptomology (QIDS)

Section 4.5.2: Additional description of accepted definitions for substance use disorders

For all the substance use disorders modeled in the GBD, the base reference case definitions are the DSM-4 criteria for substance dependence. Dependence is defined as a maladaptive pattern of substance use, leading to clinically significant impairment or distress, as manifested by three (or more) of the following, occurring any time in a 12-month period:

- Tolerance, as defined by either of the following: (a) a need for markedly increased amounts of the substance to achieve intoxication or desired effect, or (b) markedly diminished effect with continued use of the same amount of the substance.



- Withdrawal, as manifested by either of the following: (a) the characteristic withdrawal syndrome for the substance, or (b) the same (or closely related) substance is taken to relieve or avoid withdrawal symptoms.
- The substance is often taken in larger amounts or over a longer period than intended.
- There is a persistent desire or unsuccessful efforts to cut down or control substance use.
- A great deal of time is spent in activities necessary to obtain the substance, use the substance, or recover from its effects.
- Important social, occupational, or recreational activities are given up or reduced because of substance use.
- The substance use is continued despite knowledge of having a persistent physical or psychological problem that is likely to have been caused or exacerbated by the substance (e.g., current cocaine use despite recognition of cocaine-induced depression, continued drinking despite recognition that an ulcer was made worse by alcohol consumption)

DSM-4 also provides the diagnostic criteria for substance abuse. The criteria for substance abuse focus on social and situational consequences of use and does not mention withdrawal or tolerance. For alcohol use disorder specifically, we accepted author definitions of alcohol abuse and/or dependence. We did not accept author definitions measuring ‘problematic’ or ‘harmful’ alcohol use via the alcohol use disorders identification test (AUDIT). For drug use disorders we also include data on regular use, defined as how many cases use the substance weekly. Definitions described here which are not specifically measuring dependence are considered alternate accepted definitions and marked with a corresponding bias covariate.

## Section 5: Supplementary Methods

### Section 5.1: Definitions of bias covariates

Following GRADE criteria, the risk of bias criteria for individual studies included in our analyses captured representativeness of the study population, exposure and outcome measurement quality, control for confounding, selection bias, and risk of reverse causation. Because our analyses covered two distinct risk factors and many different health outcomes, we created a core set of bias covariates across all risk-outcomes pairs (Table S25) as well as additional bias covariates specific to CSA analyses (Table S24; Table S27), IPV analyses (Table S23; Table S26) and the different health outcomes selected for analyses (Table S28). For all covariates, the reference value is zero while indication of the specific bias type was coded as a one. All covariates meeting eligibility requirements (i.e., at least two studies represented for each value of the covariate) were tested for significance using the selection algorithm in the MR-BRT tool. Minimum availability of two observations for each value of the covariate meant that a reduced set of covariates were able to be tested for risk-outcome pairs with low total study counts.

Table S23. IPV-specific bias covariates.

| Bias category | Bias covariate name | Description | Values |
|---------------|---------------------|-------------|--------|
|---------------|---------------------|-------------|--------|

|                             |                     |                                                                                                                                   |                   |
|-----------------------------|---------------------|-----------------------------------------------------------------------------------------------------------------------------------|-------------------|
| <b>Exposure measurement</b> | Component_exp_def   | Author definition of IPV measured sexual violence only or physical violence only.                                                 | 0 if no; 1 if yes |
|                             | Aggregate_exp_def   | Author definition of IPV includes psychological violence.                                                                         | 0 if no; 1 if yes |
|                             | non_lifetime_recall | Author definition of IPV measure exposure over a time period shorter than lifetime (e.g., past year, past 3 years, past 6 months) | 0 if no; 1 if yes |

Table S24. CSA-specific bias covariates.

| <b>Bias category</b>                          | <b>Bias covariate name</b> | <b>Description</b>                                                                                                                                                                                                     | <b>Values</b>                                                                            |
|-----------------------------------------------|----------------------------|------------------------------------------------------------------------------------------------------------------------------------------------------------------------------------------------------------------------|------------------------------------------------------------------------------------------|
| <b>Representativeness of study population</b> | men_only                   | Covariates included for CSA analyses only (IPV analyses are only among women samples).<br><br>Captures if sample consists of men only, women only, or both men and women.                                              | men_only = 1 if male only study sample                                                   |
|                                               | women_only                 |                                                                                                                                                                                                                        | women_only = 1 if female only study sample                                               |
| <b>Exposure measurement</b>                   | admin_exp_method           | Captures if exposure was ascertained from administrative databases (health systems, agency records, etc.), since many children experiencing sexual abuse would not be reported/investigated through official channels. | 1 if study used administrative source for exposure ascertainment, 0 if not (self-report) |
|                                               | Restricted_perpetrator     | Captures if exposure to CSA was measured in the context of specific relationships (i.e., perpetrated by family member or caregiver).                                                                                   | 1 if study used restricted perpetrator identity; 0 if not                                |
|                                               | Exp_before_agebelow15      | Captures if exposure to sexual abuse/violence was measured                                                                                                                                                             | 1 if study used upper                                                                    |

|  |                       |                                                                                                                             |                                                                          |
|--|-----------------------|-----------------------------------------------------------------------------------------------------------------------------|--------------------------------------------------------------------------|
|  |                       | prior to an age less than 15 (i.e., experiences before age 12).                                                             | exposure age below 15; 0 if measured before age 15                       |
|  | Exp_before_ageabove15 | Captures if exposure to sexual abuse/violence was measured prior to an age above than 15 (e.g., experiences before age 18). | 1 if study used upper exposure age above 15; 0 if measured before age 15 |

Table S25. Standard bias covariates created across all input datasets.

| Bias category                                 | Bias covariate name      | Description                                                                                                                                                                                       | Values            |
|-----------------------------------------------|--------------------------|---------------------------------------------------------------------------------------------------------------------------------------------------------------------------------------------------|-------------------|
| <b>Representativeness of study population</b> | representativeness       | Study sample is not geographically representative of underlying location                                                                                                                          | 0 if no; 1 if yes |
|                                               | subpop                   | Study sample represents a sub-population, e.g., men who have sex with men                                                                                                                         | 0 if no; 1 if yes |
| <b>Selection bias</b>                         | selection_bias           | Captures if study is at risk for selection bias. Study determined to be at risk for selection bias if loss to follow-up (cohorts) or percent for whom data not ascertained (case-controls) > 20%. | 0 if no; 1 if yes |
| <b>Reverse causation</b>                      | reverse_causation        | Captures if study is at risk of reverse causation. Case-control studies are assumed to be at risk of reverse-causation.                                                                           | 0 if no; 1 if yes |
| <b>Control for confounding</b>                | confounding_uncontrolled | Captures if a study reports completely unadjusted estimates of association (raw or crude effect sizes).                                                                                           | 0 if no; 1 if yes |
| <b>Other</b>                                  | odds_ratio               | Study reports an odds ratio (reference: relative risk).                                                                                                                                           | 0 if no; 1 if yes |

Table S26. Bias covariates for control for confounding used in intimate partner violence analyses.

| Level of adjustment | Definition                                                          | Variables and values |    |
|---------------------|---------------------------------------------------------------------|----------------------|----|
|                     |                                                                     | Age_uncontrolled     | L1 |
| <b>Insufficient</b> | Does not control for age, regardless of control for other variables | 1                    | 1  |

|                |                                            |   |   |
|----------------|--------------------------------------------|---|---|
| <b>Middle</b>  | Controls for age and 1-2 other confounders | 0 | 1 |
| <b>Optimal</b> | Controls for age and 3+ confounders        | 0 | 0 |

Table S27. Bias covariates for control for confounding used in childhood sexual abuse analyses.

| <b>Level of adjustment</b> | <b>Definition</b>                                                          | <b>Variables and values</b> |                  |    |
|----------------------------|----------------------------------------------------------------------------|-----------------------------|------------------|----|
|                            |                                                                            | Age_uncontrolled            | Sex_uncontrolled | L1 |
| <b>Insufficient</b>        | Does not control for age or sex, regardless of control for other variables | 1                           | 1                | 1  |
| <b>Middle</b>              | Controls for age and sex only                                              | 0                           | 0                | 1  |
|                            | Controls for age only                                                      | 0                           | 1                | 1  |
|                            | Controls for sex only                                                      | 1                           | 0                | 1  |
| <b>Optimal</b>             | Controls for age, sex, and at least one additional confounder              | 0                           | 0                | 0  |

Table S28. Outcome-specific bias covariates.

| <b>Outcome</b>                   | <b>Bias covariate</b> | <b>Description</b>                                                                                                                                                   | <b>Values</b>                                                                     |
|----------------------------------|-----------------------|----------------------------------------------------------------------------------------------------------------------------------------------------------------------|-----------------------------------------------------------------------------------|
| <b>Major depressive disorder</b> | symptom_scale         | Study used a symptom scale (see list of accepted symptom scales in Table S4) to measure depressive disorders. Reference measurement tool is a diagnostic instrument. | 0 if no (diagnostic interview); 1 if yes (symptom scale)                          |
|                                  | aggregate_outcome_def | Study measured depressive disorders rather than major depressive disorder specifically.                                                                              | 0 if no (major depressive disorder); 1 if yes (depressive disorders in aggregate) |
|                                  | baseline_uncontrolled | <b>IPV analyses only:</b> study did not control for baseline diagnoses                                                                                               | 0 if no; 1 if yes                                                                 |

|                                 |                      |                                                                                                                       |                   |
|---------------------------------|----------------------|-----------------------------------------------------------------------------------------------------------------------|-------------------|
|                                 |                      | of depressive disorders.                                                                                              |                   |
|                                 | Lifetime_diagnoses   | <b>CSA analyses only:</b><br>Study measured prevalent depression diagnoses rather than incident diagnoses.            | 0 if no; 1 if yes |
| <b>Anxiety disorders</b>        | Component_outcomedef | Study measured a specific anxiety disorder (e.g. PTSD, generalized anxiety disorder) rather than any anxiety disorder | 0 if no; 1 if yes |
| <b>Alcohol use disorder</b>     | alternate_outcomedef | Study measured alcohol abuse and/or dependence rather than explicitly alcohol dependence (GBD reference definition)   | 0 if no; 1 if yes |
| <b>Drug use disorders</b>       | use                  | Study measured illicit drug use without measuring use disorder according to DSM criteria.                             | 0 if no; 1 if yes |
|                                 | specific_substance   | Study measured specific drug use disorder rather than any drug use disorder.                                          | 0 if no; 1 if yes |
|                                 | cannabis             | Study measured cannabis use / use disorder.                                                                           | 0 if no; 1 if yes |
| <b>Self-harm</b>                | lifetime_attempts    | Study assessed 'ever' suicide attempts rather than incident attempts.                                                 | 0 if no; 1 if yes |
| <b>Type 2 diabetes mellitus</b> | type_nonspecific     | Study measured diabetes mellitus without specifying type 2.                                                           | 0 if no; 1 if yes |
|                                 | prevalent_diabetes   | Study measured diabetes prevalence, not incidence.                                                                    | 0 if no; 1 if yes |
| <b>Asthma</b>                   | Regular_symptoms     | Study required presence of regular/semi-regular symptoms (e.g., wheezing, need for                                    | 0 if no; 1 if yes |

|  |  |                                                             |  |
|--|--|-------------------------------------------------------------|--|
|  |  | inhaler) in addition to asthma diagnosis for positive cases |  |
|--|--|-------------------------------------------------------------|--|

### Section 5.2: Data adjustment for non-mutually exclusive observations from a single study

In certain cases, we used multiple data points from a single study within our input modeling set. If observations reflected different participants/subgroups (i.e., sex-stratified or age-stratified effect sizes), we included all observations from the study without adjusting the standard error.

If observations reflected non-mutually exclusive measurement using the same participants (i.e., study reported effect size for physical IPV exposure [regardless of sexual IPV exposure] compared to unexposed *and* sexual IPV exposure [regardless of physical IPV exposure] compared to unexposed), we included each observation but adjusted standard errors using the following formula:

$$adjusted\ standard\ error = \sqrt{original\ standard\ error^2 * scalar}$$

where scalar = number of observations per unique participant group.

This approach ensured that the studies using repeated measurements were not over-represented in the final model.

Lastly, if observations reflected different, mutually exclusive exposure levels using the same referent group (i.e., exposed once vs. never exposed, exposed twice vs. never exposed, etc.), we included each of the multiple levels from a single study (which together make up any exposure) and did not adjust standard error.

## Section 6: Study Quality and Bias Assessment

We report the bias covariates marked and tested for each IPV risk-outcome pair in Table S29 and each CSA risk-outcome pair in Tables S30a and S30b. N/A indicates that there were not enough studies within the risk-outcome pair combination to test the respective bias covariate; 1 indicates that the bias covariate applies to the study for that risk-outcome pair; 0 indicates that the bias covariate does not apply to the study for that risk-outcome pair.

Table S29: Study bias characteristics for intimate partner violence.

| Author            | Health outcome            | Study reports odds ratio | Study at risk of selection bias | Uncontrolled for age | Represents a subpopulation | Cases ascertained from clinical sample | Study at risk of reverse causation | Uncontrolled for any confounders | Exposure definition is a component of reference definition | Measured recent/current IPV (rather than lifetime) | Sample not geographically representative | Used symptom scaled to ascertain depression | Outcome definition is a component of reference definition | Uncontrolled more than 2 covariates beyond age | Outcome definition is aggregate of reference | Exposure definition includes psychological violence |
|-------------------|---------------------------|--------------------------|---------------------------------|----------------------|----------------------------|----------------------------------------|------------------------------------|----------------------------------|------------------------------------------------------------|----------------------------------------------------|------------------------------------------|---------------------------------------------|-----------------------------------------------------------|------------------------------------------------|----------------------------------------------|-----------------------------------------------------|
| Ahmadabadi 2020   | Anxiety disorders         | N/A                      | 1                               | N/A                  | 0                          | N/A                                    | N/A                                | N/A                              | 1                                                          | 0                                                  | 1                                        | 0                                           | 0                                                         | 0                                              | N/A                                          | N/A                                                 |
| Brown 2020        | Anxiety disorders         | N/A                      | 1                               | N/A                  | 1                          | N/A                                    | N/A                                | N/A                              | 0                                                          | 1                                                  | 1                                        | 1                                           | 0                                                         | 0                                              | N/A                                          | N/A                                                 |
| Ehrensaft 2006    | Anxiety disorders         | N/A                      | 0                               | N/A                  | 0                          | N/A                                    | N/A                                | N/A                              | 1                                                          | 1                                                  | 0                                        | 0                                           | 1                                                         | 1                                              | N/A                                          | N/A                                                 |
| Makaroun 2020     | Anxiety disorders         | N/A                      | 0                               | N/A                  | 1                          | N/A                                    | N/A                                | N/A                              | 0                                                          | 1                                                  | 1                                        | 0                                           | 0                                                         | 1                                              | N/A                                          | N/A                                                 |
| Suglia 2011       | Anxiety disorders         | N/A                      | 1                               | N/A                  | 1                          | N/A                                    | N/A                                | N/A                              | 0                                                          | 0                                                  | 0                                        | 1                                           | 1                                                         | 0                                              | N/A                                          | N/A                                                 |
| DeLong 2019       | HIV/AIDS                  | 0                        | 0                               | 0                    | 0                          | N/A                                    | N/A                                | N/A                              | N/A                                                        | N/A                                                | N/A                                      | N/A                                         | N/A                                                       | N/A                                            | N/A                                          | N/A                                                 |
| Deyessa 2018      | HIV/AIDS                  | 1                        | 0                               | 0                    | 0                          | N/A                                    | N/A                                | N/A                              | N/A                                                        | N/A                                                | N/A                                      | N/A                                         | N/A                                                       | N/A                                            | N/A                                          | N/A                                                 |
| Fonck 2005        | HIV/AIDS                  | 1                        | 0                               | 1                    | 1                          | N/A                                    | N/A                                | N/A                              | N/A                                                        | N/A                                                | N/A                                      | N/A                                         | N/A                                                       | N/A                                            | N/A                                          | N/A                                                 |
| Jewkes 2010       | HIV/AIDS                  | 0                        | 0                               | 0                    | 0                          | N/A                                    | N/A                                | N/A                              | N/A                                                        | N/A                                                | N/A                                      | N/A                                         | N/A                                                       | N/A                                            | N/A                                          | N/A                                                 |
| Kouyoumdjian 2013 | HIV/AIDS                  | 0                        | 1                               | 1                    | 0                          | N/A                                    | N/A                                | N/A                              | N/A                                                        | N/A                                                | N/A                                      | N/A                                         | N/A                                                       | N/A                                            | N/A                                          | N/A                                                 |
| Maman 2002        | HIV/AIDS                  | 1                        | 1                               | 0                    | 1                          | N/A                                    | N/A                                | N/A                              | N/A                                                        | N/A                                                | N/A                                      | N/A                                         | N/A                                                       | N/A                                            | N/A                                          | N/A                                                 |
| Ahmadabadi 2020   | Major depressive disorder | N/A                      | 1                               | 0                    | 0                          | N/A                                    | 0                                  | 0                                | 0                                                          | 0                                                  | 1                                        | 0                                           | N/A                                                       | 0                                              | 0                                            | 0                                                   |

| Author             | Health outcome            | Study reports odds ratio | Study at risk of selection bias | Uncontrolled for age | Represents a subpopulation | Cases ascertained from clinical sample | Study at risk of reverse causation | Uncontrolled for any confounders | Exposure definition is a component of reference definition | Measured recent/current IPV (rather than lifetime) | Sample not geographically representative | Used symptom scaled to ascertain depression | Outcome definition is a component of reference definition | Uncontrolled more than 2 covariates beyond age | Outcome definition is aggregate of reference | Exposure definition includes psychological violence |
|--------------------|---------------------------|--------------------------|---------------------------------|----------------------|----------------------------|----------------------------------------|------------------------------------|----------------------------------|------------------------------------------------------------|----------------------------------------------------|------------------------------------------|---------------------------------------------|-----------------------------------------------------------|------------------------------------------------|----------------------------------------------|-----------------------------------------------------|
| Ali 2009           | Major depressive disorder | N/A                      | 0                               | 1                    | 1                          | N/A                                    | 1                                  | 1                                | 0                                                          | 0                                                  | 1                                        | 0                                           | N/A                                                       | 1                                              | 1                                            | 1                                                   |
| Ali 2009           | Major depressive disorder | N/A                      | 0                               | 0                    | 1                          | N/A                                    | 1                                  | 0                                | 0                                                          | 0                                                  | 1                                        | 0                                           | N/A                                                       | 0                                              | 1                                            | 1                                                   |
| Brown 2020         | Major depressive disorder | N/A                      | 1                               | 0                    | 1                          | N/A                                    | 0                                  | 0                                | 0                                                          | 1                                                  | 1                                        | 1                                           | N/A                                                       | 0                                              | 0                                            | 1                                                   |
| Chowdhary 2008     | Major depressive disorder | N/A                      | 0                               | 0                    | 1                          | N/A                                    | 0                                  | 0                                | 0                                                          | 0                                                  | 1                                        | 0                                           | N/A                                                       | 1                                              | 1                                            | 0                                                   |
| Ehrensaft 2006     | Major depressive disorder | N/A                      | 0                               | 0                    | 0                          | N/A                                    | 0                                  | 0                                | 1                                                          | 1                                                  | 0                                        | 0                                           | N/A                                                       | 1                                              | 0                                            | 0                                                   |
| Han 2019           | Major depressive disorder | N/A                      | 0                               | 0                    | 1                          | N/A                                    | 0                                  | 0                                | 1                                                          | 1                                                  | 0                                        | 1                                           | N/A                                                       | 0                                              | 1                                            | 0                                                   |
| Llosamartínez 2019 | Major depressive disorder | N/A                      | 1                               | 1                    | 0                          | N/A                                    | 1                                  | 1                                | 0                                                          | 1                                                  | 1                                        | 1                                           | N/A                                                       | 1                                              | 1                                            | 1                                                   |
| Makaroun 2020      | Major depressive disorder | N/A                      | 0                               | 0                    | 1                          | N/A                                    | 0                                  | 0                                | 0                                                          | 1                                                  | 1                                        | 0                                           | N/A                                                       | 1                                              | 1                                            | 0                                                   |
| Ouellet-Morin 2015 | Major depressive disorder | N/A                      | 0                               | 1                    | 1                          | N/A                                    | 0                                  | 0                                | 0                                                          | 1                                                  | 0                                        | 0                                           | N/A                                                       | 1                                              | 1                                            | 1                                                   |
| Pico-Alfonso 2006  | Major depressive disorder | N/A                      | 0                               | 1                    | 0                          | N/A                                    | 1                                  | 1                                | 0                                                          | 0                                                  | 1                                        | 1                                           | N/A                                                       | 1                                              | 1                                            | 1                                                   |



| Author         | Health outcome                    | Study reports odds ratio | Study at risk of selection bias | Uncontrolled for age | Represents a subpopulation | Cases ascertained from clinical sample | Study at risk of reverse causation | Uncontrolled for any confounders | Exposure definition is a component of reference definition | Measured recent/current IPV (rather than lifetime) | Sample not geographically representative | Used symptom scaled to ascertain depression | Outcome definition is a component of reference definition | Uncontrolled more than 2 covariates beyond age | Outcome definition is aggregate of reference | Exposure definition includes psychological violence |
|----------------|-----------------------------------|--------------------------|---------------------------------|----------------------|----------------------------|----------------------------------------|------------------------------------|----------------------------------|------------------------------------------------------------|----------------------------------------------------|------------------------------------------|---------------------------------------------|-----------------------------------------------------------|------------------------------------------------|----------------------------------------------|-----------------------------------------------------|
| Suglia 2011    | Major depressive disorder         | N/A                      | 1                               | 0                    | 1                          | N/A                                    | 0                                  | 0                                | 0                                                          | 0                                                  | 0                                        | 1                                           | N/A                                                       | 0                                              | 1                                            | 0                                                   |
| Taft 2008      | Major depressive disorder         | N/A                      | 1                               | 0                    | 0                          | N/A                                    | 0                                  | 0                                | 0                                                          | 0                                                  | 0                                        | 1                                           | N/A                                                       | 0                                              | 1                                            | 0                                                   |
| Abdollahi 2015 | Maternal abortion and miscarriage | N/A                      | N/A                             | 0                    | N/A                        | N/A                                    | 0                                  | 0                                | 0                                                          | 1                                                  | N/A                                      | N/A                                         | N/A                                                       | N/A                                            | N/A                                          | N/A                                                 |
| Bourassa 2007  | Maternal abortion and miscarriage | N/A                      | N/A                             | 1                    | N/A                        | N/A                                    | 1                                  | 1                                | 0                                                          | 1                                                  | N/A                                      | N/A                                         | N/A                                                       | N/A                                            | N/A                                          | N/A                                                 |
| Catak 2016     | Maternal abortion and miscarriage | N/A                      | N/A                             | 1                    | N/A                        | N/A                                    | 1                                  | 0                                | 1                                                          | 0                                                  | N/A                                      | N/A                                         | N/A                                                       | N/A                                            | N/A                                          | N/A                                                 |
| Ibrahim 2015   | Maternal abortion and miscarriage | N/A                      | N/A                             | 1                    | N/A                        | N/A                                    | 0                                  | 1                                | 1                                                          | 1                                                  | N/A                                      | N/A                                         | N/A                                                       | N/A                                            | N/A                                          | N/A                                                 |
| Johri 2011     | Maternal abortion and miscarriage | N/A                      | N/A                             | 0                    | N/A                        | N/A                                    | 1                                  | 0                                | 0                                                          | 1                                                  | N/A                                      | N/A                                         | N/A                                                       | N/A                                            | N/A                                          | N/A                                                 |
| Leung 2002     | Maternal abortion and miscarriage | N/A                      | N/A                             | 1                    | N/A                        | N/A                                    | 1                                  | 1                                | 0                                                          | 1                                                  | N/A                                      | N/A                                         | N/A                                                       | N/A                                            | N/A                                          | N/A                                                 |
| Nelson 2003    | Maternal abortion and miscarriage | N/A                      | N/A                             | 1                    | N/A                        | N/A                                    | 1                                  | 1                                | 1                                                          | 0                                                  | N/A                                      | N/A                                         | N/A                                                       | N/A                                            | N/A                                          | N/A                                                 |
| Romito 2009    | Maternal abortion and miscarriage | N/A                      | N/A                             | 1                    | N/A                        | N/A                                    | 1                                  | 0                                | 0                                                          | 1                                                  | N/A                                      | N/A                                         | N/A                                                       | N/A                                            | N/A                                          | N/A                                                 |

| Author         | Health outcome                    | Study reports odds ratio | Study at risk of selection bias | Uncontrolled for age | Represents a subpopulation | Cases ascertained from clinical sample | Study at risk of reverse causation | Uncontrolled for any confounders | Exposure definition is a component of reference definition | Measured recent/current IPV (rather than lifetime) | Sample not geographically representative | Used symptom scaled to ascertain depression | Outcome definition is a component of reference definition | Uncontrolled more than 2 covariates beyond age | Outcome definition is aggregate of reference | Exposure definition includes psychological violence |
|----------------|-----------------------------------|--------------------------|---------------------------------|----------------------|----------------------------|----------------------------------------|------------------------------------|----------------------------------|------------------------------------------------------------|----------------------------------------------------|------------------------------------------|---------------------------------------------|-----------------------------------------------------------|------------------------------------------------|----------------------------------------------|-----------------------------------------------------|
| Taft 2019      | Maternal abortion and miscarriage | N/A                      | N/A                             | 0                    | N/A                        | N/A                                    | 0                                  | 0                                | 0                                                          | 0                                                  | N/A                                      | N/A                                         | N/A                                                       | N/A                                            | N/A                                          | N/A                                                 |
| Ackard 2007    | Self-harm                         | N/A                      | 1                               | N/A                  | N/A                        | 0                                      | N/A                                | N/A                              | N/A                                                        | N/A                                                | N/A                                      | N/A                                         | N/A                                                       | N/A                                            | N/A                                          | N/A                                                 |
| Chowdhary 2008 | Self-harm                         | N/A                      | 0                               | N/A                  | N/A                        | 0                                      | N/A                                | N/A                              | N/A                                                        | N/A                                                | N/A                                      | N/A                                         | N/A                                                       | N/A                                            | N/A                                          | N/A                                                 |
| Kaslow 2000    | Self-harm                         | N/A                      | 1                               | N/A                  | N/A                        | 1                                      | N/A                                | N/A                              | N/A                                                        | N/A                                                | N/A                                      | N/A                                         | N/A                                                       | N/A                                            | N/A                                          | N/A                                                 |
| Makaroun 2020  | Self-harm                         | N/A                      | 0                               | N/A                  | N/A                        | 1                                      | N/A                                | N/A                              | N/A                                                        | N/A                                                | N/A                                      | N/A                                         | N/A                                                       | N/A                                            | N/A                                          | N/A                                                 |

N/A, not available across minimum number of studies needed and not tested for given risk outcome pair. 1 = bias covariate applies to the study; 0 = bias covariate does not apply.

Table S30a: Study bias Characteristics for childhood sexual abuse

| Author         | Health outcome        | sex_uncontrolled | regular_symptoms | exp_before_age_above15 | exp_before_age_below15 | women_only | selection_bias | age_uncontrolled | selfreported | type_nosp | prevalent_diabetes | restricted_perp | reverse_causation | subpop | odds_ratio |
|----------------|-----------------------|------------------|------------------|------------------------|------------------------|------------|----------------|------------------|--------------|-----------|--------------------|-----------------|-------------------|--------|------------|
| Borges 2021    | Alcohol use disorders | N/A              | N/A              | N/A                    | N/A                    | 0          | 1              | N/A              | N/A          | N/A       | N/A                | N/A             | N/A               | 0      | 0          |
| Cutajar 2010   | Alcohol use disorders | N/A              | N/A              | N/A                    | N/A                    | 0          | 0              | N/A              | N/A          | N/A       | N/A                | N/A             | N/A               | 0      | 1          |
| Dinwiddie 2000 | Alcohol use disorders | N/A              | N/A              | N/A                    | N/A                    | 0          | 0              | N/A              | N/A          | N/A       | N/A                | N/A             | N/A               | 1      | 1          |
| Fenton 2013    | Alcohol use disorders | N/A              | N/A              | N/A                    | N/A                    | 0          | 1              | N/A              | N/A          | N/A       | N/A                | N/A             | N/A               | 0      | 1          |
| Fergusson 1996 | Alcohol use disorders | N/A              | N/A              | N/A                    | N/A                    | 0          | 0              | N/A              | N/A          | N/A       | N/A                | N/A             | N/A               | 0      | 1          |
| Kendler 2000   | Alcohol use disorders | N/A              | N/A              | N/A                    | N/A                    | 1          | 1              | N/A              | N/A          | N/A       | N/A                | N/A             | N/A               | 1      | 1          |
| Najman 2022    | Alcohol use disorders | N/A              | N/A              | N/A                    | N/A                    | 0          | 1              | N/A              | N/A          | N/A       | N/A                | N/A             | N/A               | 0      | 1          |
| Nelson 2002    | Alcohol use disorders | N/A              | N/A              | N/A                    | N/A                    | 0          | 0              | N/A              | N/A          | N/A       | N/A                | N/A             | N/A               | 1      | 0          |
| Roustit 2009   | Alcohol use disorders | N/A              | N/A              | N/A                    | N/A                    | 0          | 1              | N/A              | N/A          | N/A       | N/A                | N/A             | N/A               | 0      | 1          |
| Sartor 2007    | Alcohol use disorders | N/A              | N/A              | N/A                    | N/A                    | 1          | 1              | N/A              | N/A          | N/A       | N/A                | N/A             | N/A               | 1      | 1          |
| Laporte 2001   | Anorexia nervosa      | N/A              | N/A              | N/A                    | N/A                    | N/A        | N/A            | N/A              | N/A          | N/A       | N/A                | 1               | 1                 | N/A    | N/A        |
| Paraventi 2011 | Anorexia nervosa      | N/A              | N/A              | N/A                    | N/A                    | N/A        | N/A            | N/A              | N/A          | N/A       | N/A                | 0               | 1                 | N/A    | N/A        |
| Sanci 2008     | Anorexia nervosa      | N/A              | N/A              | N/A                    | N/A                    | N/A        | N/A            | N/A              | N/A          | N/A       | N/A                | 1               | 0                 | N/A    | N/A        |

| Author         | Health outcome    | sex_uncontrolled | regular_symptoms | exp_before_age_above15 | exp_before_age_below15 | women_only | selection_bias | age_uncontrolled | selfreported | type_nosp | prevalent_diabetes | restricted_perp | reverse_causation | subpop | odds_ratio |
|----------------|-------------------|------------------|------------------|------------------------|------------------------|------------|----------------|------------------|--------------|-----------|--------------------|-----------------|-------------------|--------|------------|
| Talmon 2021    | Anorexia nervosa  | N/A              | N/A              | N/A                    | N/A                    | N/A        | N/A            | N/A              | N/A          | N/A       | N/A                | 0               | 0                 | N/A    | N/A        |
| Cohen 2001     | Anxiety disorders | N/A              | N/A              | 1                      | 0                      | 0          | 0              | 0                | N/A          | N/A       | N/A                | N/A             | N/A               | N/A    | N/A        |
| Copeland 2018  | Anxiety disorders | N/A              | N/A              | 1                      | 0                      | 0          | 0              | 1                | N/A          | N/A       | N/A                | N/A             | N/A               | N/A    | N/A        |
| Dinwiddie 2000 | Anxiety disorders | N/A              | N/A              | 1                      | 0                      | 1          | 0              | 0                | N/A          | N/A       | N/A                | N/A             | N/A               | N/A    | N/A        |
| Fergusson 2008 | Anxiety disorders | N/A              | N/A              | 1                      | 0                      | 0          | 0              | 0                | N/A          | N/A       | N/A                | N/A             | N/A               | N/A    | N/A        |
| Fujiwara 2011  | Anxiety disorders | N/A              | N/A              | 1                      | 0                      | 0          | 1              | 0                | N/A          | N/A       | N/A                | N/A             | N/A               | N/A    | N/A        |
| Hovens 2015    | Anxiety disorders | N/A              | N/A              | 1                      | 0                      | 0          | 0              | 0                | N/A          | N/A       | N/A                | N/A             | N/A               | N/A    | N/A        |
| Kendler 2000   | Anxiety disorders | N/A              | N/A              | 1                      | 0                      | 1          | 1              | 0                | N/A          | N/A       | N/A                | N/A             | N/A               | N/A    | N/A        |
| Kisely 2021    | Anxiety disorders | N/A              | N/A              | 1                      | 0                      | 0          | 1              | 0                | N/A          | N/A       | N/A                | N/A             | N/A               | N/A    | N/A        |
| Raposo 2014    | Anxiety disorders | N/A              | N/A              | 1                      | 0                      | 0          | 0              | 1                | N/A          | N/A       | N/A                | N/A             | N/A               | N/A    | N/A        |
| Tenhaven 2019  | Anxiety disorders | N/A              | N/A              | 1                      | 0                      | 0          | 1              | 0                | N/A          | N/A       | N/A                | N/A             | N/A               | N/A    | N/A        |
| Widom 1999     | Anxiety disorders | N/A              | N/A              | 0                      | 1                      | 0          | 1              | 0                | N/A          | N/A       | N/A                | N/A             | N/A               | N/A    | N/A        |
| Zinzow 2012    | Anxiety disorders | N/A              | N/A              | 0                      | 1                      | 1          | 1              | 0                | N/A          | N/A       | N/A                | N/A             | N/A               | N/A    | N/A        |
| Abajobir 2017  | Asthma            | 1                | 0                | 0                      | 1                      | N/A        | N/A            | N/A              | N/A          | N/A       | N/A                | N/A             | N/A               | N/A    | N/A        |
| Coogan 2013    | Asthma            | 0                | 1                | 0                      | 1                      | N/A        | N/A            | N/A              | N/A          | N/A       | N/A                | N/A             | N/A               | N/A    | N/A        |
| Han 2022       | Asthma            | 0                | 1                | 1                      | 0                      | N/A        | N/A            | N/A              | N/A          | N/A       | N/A                | N/A             | N/A               | N/A    | N/A        |
| Kascakova 2022 | Asthma            | 1                | 0                | 1                      | 0                      | N/A        | N/A            | N/A              | N/A          | N/A       | N/A                | N/A             | N/A               | N/A    | N/A        |
| Andrews 1995   | Bulimia nervosa   | N/A              | N/A              | N/A                    | N/A                    | N/A        | 1              | 1                | N/A          | N/A       | N/A                | N/A             | N/A               | N/A    | N/A        |

| Author         | Health outcome     | sex_uncontrolled | regular_symptoms | exp_before_age_above15 | exp_before_age_below15 | women_only | selection_bias | age_uncontrolled | selfreported | type_nosp | prevalent_diabetes | restricted_perp | reverse_causation | subpop | odds_ratio |
|----------------|--------------------|------------------|------------------|------------------------|------------------------|------------|----------------|------------------|--------------|-----------|--------------------|-----------------|-------------------|--------|------------|
| Kendler 2000   | Bulimia nervosa    | N/A              | N/A              | N/A                    | N/A                    | N/A        | 1              | 0                | N/A          | N/A       | N/A                | N/A             | N/A               | N/A    | N/A        |
| Paraventi 2011 | Bulimia nervosa    | N/A              | N/A              | N/A                    | N/A                    | N/A        | 0              | 1                | N/A          | N/A       | N/A                | N/A             | N/A               | N/A    | N/A        |
| Sanci 2008     | Bulimia nervosa    | N/A              | N/A              | N/A                    | N/A                    | N/A        | 1              | 0                | N/A          | N/A       | N/A                | N/A             | N/A               | N/A    | N/A        |
| Talmon 2021    | Bulimia nervosa    | N/A              | N/A              | N/A                    | N/A                    | N/A        | 0              | 0                | N/A          | N/A       | N/A                | N/A             | N/A               | N/A    | N/A        |
| Dinwiddie 2000 | Conduct disorder   | N/A              | N/A              | N/A                    | N/A                    | N/A        | N/A            | N/A              | N/A          | N/A       | N/A                | N/A             | N/A               | N/A    | N/A        |
| Fergusson 1996 | Conduct disorder   | N/A              | N/A              | N/A                    | N/A                    | N/A        | N/A            | N/A              | N/A          | N/A       | N/A                | N/A             | N/A               | N/A    | N/A        |
| Nelson 2002    | Conduct disorder   | N/A              | N/A              | N/A                    | N/A                    | N/A        | N/A            | N/A              | N/A          | N/A       | N/A                | N/A             | N/A               | N/A    | N/A        |
| Borges 2021    | Drug use disorders | N/A              | N/A              | 1                      | 0                      | 0          | 1              | 1                | N/A          | N/A       | N/A                | 0               | 0                 | 0      | 0          |
| Cohen 2001     | Drug use disorders | N/A              | N/A              | 1                      | 0                      | 0          | 0              | 0                | N/A          | N/A       | N/A                | 1               | 0                 | 0      | 1          |
| Conroy 2009    | Drug use disorders | N/A              | N/A              | 1                      | 0                      | 0          | 0              | 0                | N/A          | N/A       | N/A                | 0               | 1                 | 1      | 1          |
| Cutajar 2010   | Drug use disorders | N/A              | N/A              | 1                      | 0                      | 0          | 0              | 0                | N/A          | N/A       | N/A                | 0               | 1                 | 0      | 1          |
| Duncan 2008    | Drug use disorders | N/A              | N/A              | 1                      | 0                      | 0          | 1              | 0                | N/A          | N/A       | N/A                | 0               | 0                 | 1      | 0          |
| Fergusson 1996 | Drug use disorders | N/A              | N/A              | 1                      | 0                      | 0          | 0              | 0                | N/A          | N/A       | N/A                | 0               | 0                 | 0      | 1          |
| Huang 2011     | Drug use disorders | N/A              | N/A              | 0                      | 1                      | 0          | 1              | 0                | N/A          | N/A       | N/A                | 1               | 0                 | 0      | 1          |
| Kalichman 2001 | Drug use disorders | N/A              | N/A              | 1                      | 0                      | 0          | 0              | 1                | N/A          | N/A       | N/A                | 0               | 0                 | 1      | 1          |
| Kaukinen 2005  | Drug use disorders | N/A              | N/A              | 0                      | 1                      | 1          | 1              | 0                | N/A          | N/A       | N/A                | 0               | 0                 | 1      | 1          |
| Kendler 2000   | Drug use disorders | N/A              | N/A              | 1                      | 0                      | 1          | 1              | 0                | N/A          | N/A       | N/A                | 1               | 0                 | 1      | 1          |
| Najman 2022    | Drug use disorders | N/A              | N/A              | 1                      | 0                      | 0          | 1              | 0                | N/A          | N/A       | N/A                | 0               | 0                 | 0      | 1          |

| Author          | Health outcome            | sex_uncontrolled | regular_symptoms | exp_before_age_above15 | exp_before_age_below15 | women_only | selection_bias | age_uncontrolled | selfreported | type_nonsp | prevalent_diabetes | restricted_perp | reverse_causation | subpop | odds_ratio |
|-----------------|---------------------------|------------------|------------------|------------------------|------------------------|------------|----------------|------------------|--------------|------------|--------------------|-----------------|-------------------|--------|------------|
| Nelson 2006     | Drug use disorders        | N/A              | N/A              | 1                      | 0                      | 0          | 0              | 0                | N/A          | N/A        | N/A                | 0               | 0                 | 1      | 0          |
| Nelson 2006     | Drug use disorders        | N/A              | N/A              | 1                      | 0                      | 0          | 0              | 0                | N/A          | N/A        | N/A                | 0               | 0                 | 1      | 0          |
| Sweet 2013      | Drug use disorders        | N/A              | N/A              | 1                      | 0                      | 0          | 1              | 1                | N/A          | N/A        | N/A                | 0               | 0                 | 0      | 1          |
| Sweet 2013      | Drug use disorders        | N/A              | N/A              | 1                      | 0                      | 0          | 1              | 0                | N/A          | N/A        | N/A                | 0               | 0                 | 0      | 1          |
| Tanaka 2015     | Drug use disorders        | N/A              | N/A              | 1                      | 0                      | 0          | 1              | 0                | N/A          | N/A        | N/A                | 0               | 0                 | 0      | 1          |
| Tonmyr 2017     | Drug use disorders        | N/A              | N/A              | 1                      | 0                      | 0          | 0              | 0                | N/A          | N/A        | N/A                | 0               | 0                 | 0      | 1          |
| Zinzow 2012     | Drug use disorders        | N/A              | N/A              | 0                      | 1                      | 1          | 1              | 0                | N/A          | N/A        | N/A                | 0               | 0                 | 1      | 1          |
| Deyessa 2018    | HIV/AIDS                  | N/A              | N/A              | 1                      | 0                      | 1          | 0              | N/A              | N/A          | N/A        | N/A                | N/A             | 1                 | 1      | N/A        |
| Maman 2002      | HIV/AIDS                  | N/A              | N/A              | 0                      | 1                      | 1          | 1              | N/A              | N/A          | N/A        | N/A                | N/A             | 0                 | 1      | N/A        |
| Mimiaga 2009    | HIV/AIDS                  | N/A              | N/A              | 1                      | 0                      | 0          | 0              | N/A              | N/A          | N/A        | N/A                | N/A             | 0                 | 1      | N/A        |
| Naicker 2022    | HIV/AIDS                  | N/A              | N/A              | 1                      | 0                      | 0          | 1              | N/A              | N/A          | N/A        | N/A                | N/A             | 0                 | 0      | N/A        |
| Widom 2012      | HIV/AIDS                  | N/A              | N/A              | 0                      | 1                      | 0          | 1              | N/A              | N/A          | N/A        | N/A                | N/A             | 0                 | 0      | N/A        |
| Wyatt 2002      | HIV/AIDS                  | N/A              | N/A              | 1                      | 0                      | 1          | 0              | N/A              | N/A          | N/A        | N/A                | N/A             | 1                 | 1      | N/A        |
| Xavierhall 2021 | HIV/AIDS                  | N/A              | N/A              | 0                      | 1                      | 0          | 0              | N/A              | N/A          | N/A        | N/A                | N/A             | 0                 | 1      | N/A        |
| Dong 2004       | Ischemic heart disease    | N/A              | N/A              | N/A                    | N/A                    | N/A        | N/A            | N/A              | N/A          | N/A        | N/A                | N/A             | N/A               | N/A    | N/A        |
| Kascakova 2022  | Ischemic heart disease    | N/A              | N/A              | N/A                    | N/A                    | N/A        | N/A            | N/A              | N/A          | N/A        | N/A                | N/A             | N/A               | N/A    | N/A        |
| Monnat 2015     | Ischemic heart disease    | N/A              | N/A              | N/A                    | N/A                    | N/A        | N/A            | N/A              | N/A          | N/A        | N/A                | N/A             | N/A               | N/A    | N/A        |
| Andrews 1995    | Major depressive disorder | 0                | N/A              | 1                      | 0                      | 1          | 1              | 1                | N/A          | N/A        | N/A                | N/A             | 0                 | 1      | 1          |
| Bifulco 1991    | Major depressive disorder | 0                | N/A              | 1                      | 0                      | 1          | 1              | 1                | N/A          | N/A        | N/A                | N/A             | 0                 | 1      | 1          |

| Author         | Health outcome            | sex_uncontrolled | regular_symptoms | exp_before_age_above15 | exp_before_age_below15 | women_only | selection_bias | age_uncontrolled | selfreported | type_nosp | prevalent_diabetes | restricted_perp | reverse_causation | subpop | odds_ratio |
|----------------|---------------------------|------------------|------------------|------------------------|------------------------|------------|----------------|------------------|--------------|-----------|--------------------|-----------------|-------------------|--------|------------|
| Chapman 2004   | Major depressive disorder | 0                | N/A              | 1                      | 0                      | 0          | 1              | 1                | N/A          | N/A       | N/A                | N/A             | 0                 | 1      | 1          |
| Cheasty 1998   | Major depressive disorder | 0                | N/A              | 1                      | 0                      | 1          | 1              | 1                | N/A          | N/A       | N/A                | N/A             | 1                 | 1      | 1          |
| Cohen 2001     | Major depressive disorder | 0                | N/A              | 1                      | 0                      | 0          | 0              | 0                | N/A          | N/A       | N/A                | N/A             | 0                 | 0      | 1          |
| Comijs 2013    | Major depressive disorder | 0                | N/A              | 1                      | 0                      | 0          | 0              | 0                | N/A          | N/A       | N/A                | N/A             | 1                 | 0      | 1          |
| Copeland 2018  | Major depressive disorder | 0                | N/A              | 1                      | 0                      | 0          | 0              | 1                | N/A          | N/A       | N/A                | N/A             | 0                 | 0      | 1          |
| Dinwiddie 2000 | Major depressive disorder | 0                | N/A              | 1                      | 0                      | 0          | 0              | 0                | N/A          | N/A       | N/A                | N/A             | 0                 | 0      | 1          |
| Dube 2005      | Major depressive disorder | 0                | N/A              | 1                      | 0                      | 0          | 0              | 0                | N/A          | N/A       | N/A                | N/A             | 0                 | 1      | 1          |
| Ebert 2019     | Major depressive disorder | 1                | N/A              | 1                      | 0                      | 0          | 1              | 1                | N/A          | N/A       | N/A                | N/A             | 0                 | 1      | 1          |
| Fergusson 2008 | Major depressive disorder | 0                | N/A              | 1                      | 0                      | 0          | 0              | 0                | N/A          | N/A       | N/A                | N/A             | 0                 | 0      | 1          |
| Galloeag 2017  | Major depressive disorder | 0                | N/A              | 0                      | 0                      | 1          | 1              | 0                | N/A          | N/A       | N/A                | N/A             | 0                 | 1      | 1          |
| Houtepe n 2020 | Major depressive disorder | 0                | N/A              | 0                      | 0                      | 0          | 0              | 0                | N/A          | N/A       | N/A                | N/A             | 0                 | 0      | 1          |
| Hovens 2015    | Major depressive disorder | 0                | N/A              | 1                      | 0                      | 0          | 0              | 0                | N/A          | N/A       | N/A                | N/A             | 0                 | 0      | 1          |
| Jaffee 2002    | Major depressive disorder | 0                | N/A              | 0                      | 1                      | 0          | 0              | 1                | N/A          | N/A       | N/A                | N/A             | 0                 | 0      | 1          |
| Kendler 2000   | Major depressive disorder | 0                | N/A              | 1                      | 0                      | 1          | 1              | 0                | N/A          | N/A       | N/A                | N/A             | 0                 | 1      | 1          |
| Kisely 2021    | Major depressive disorder | 0                | N/A              | 1                      | 0                      | 0          | 1              | 0                | N/A          | N/A       | N/A                | N/A             | 0                 | 0      | 1          |
| Mullen 1996    | Major depressive disorder | 0                | N/A              | 1                      | 0                      | 1          | 1              | 1                | N/A          | N/A       | N/A                | N/A             | 0                 | 1      | 1          |

| Author                | Health outcome                    | sex_uncontrolled | regular_symptoms | exp_before_age_above15 | exp_before_age_below15 | women_only | selection_bias | age_uncontrolled | selfreported | type_nosp | prevalent_diabetes | restricted_perp | reverse_causation | subpop | odds_ratio |
|-----------------------|-----------------------------------|------------------|------------------|------------------------|------------------------|------------|----------------|------------------|--------------|-----------|--------------------|-----------------|-------------------|--------|------------|
| Nelson 2002           | Major depressive disorder         | 0                | N/A              | 1                      | 0                      | 0          | 0              | 0                | N/A          | N/A       | N/A                | N/A             | 0                 | 0      | 0          |
| Ratner 2003           | Major depressive disorder         | 0                | N/A              | 0                      | 1                      | 0          | 0              | 1                | N/A          | N/A       | N/A                | N/A             | 0                 | 1      | 1          |
| Roustit 2009          | Major depressive disorder         | 0                | N/A              | 1                      | 0                      | 0          | 1              | 0                | N/A          | N/A       | N/A                | N/A             | 0                 | 0      | 1          |
| Su 2022               | Major depressive disorder         | 1                | N/A              | 1                      | 0                      | 0          | 1              | 1                | N/A          | N/A       | N/A                | N/A             | 0                 | 0      | 0          |
| Widom 2007            | Major depressive disorder         | 0                | N/A              | 0                      | 1                      | 0          | 1              | 0                | N/A          | N/A       | N/A                | N/A             | 0                 | 0      | 1          |
| Wise 2001             | Major depressive disorder         | 0                | N/A              | 1                      | 0                      | 1          | 0              | 0                | N/A          | N/A       | N/A                | N/A             | 1                 | 1      | 0          |
| Xiao 2022             | Major depressive disorder         | 1                | N/A              | 0                      | 0                      | 0          | 0              | 1                | N/A          | N/A       | N/A                | N/A             | 1                 | 0      | 1          |
| Zinzow 2012           | Major depressive disorder         | 0                | N/A              | 0                      | 1                      | 1          | 1              | 0                | N/A          | N/A       | N/A                | N/A             | 0                 | 1      | 1          |
| Abajobir 2018         | Maternal abortion and miscarriage | N/A              | N/A              | N/A                    | N/A                    | N/A        | 1              | N/A              | N/A          | N/A       | N/A                | N/A             | N/A               | N/A    | 1          |
| Demakakos 2020        | Maternal abortion and miscarriage | N/A              | N/A              | N/A                    | N/A                    | N/A        | 0              | N/A              | N/A          | N/A       | N/A                | N/A             | N/A               | N/A    | 0          |
| Fortin-Langelier 2019 | Maternal abortion and miscarriage | N/A              | N/A              | N/A                    | N/A                    | N/A        | 1              | N/A              | N/A          | N/A       | N/A                | N/A             | N/A               | N/A    | 0          |
| Kerkar 2021           | Maternal abortion and miscarriage | N/A              | N/A              | N/A                    | N/A                    | N/A        | 0              | N/A              | N/A          | N/A       | N/A                | N/A             | N/A               | N/A    | 1          |
| Taft 2019             | Maternal abortion and miscarriage | N/A              | N/A              | N/A                    | N/A                    | N/A        | 1              | N/A              | N/A          | N/A       | N/A                | N/A             | N/A               | N/A    | 1          |
| Vanroode 2009         | Maternal abortion and miscarriage | N/A              | N/A              | N/A                    | N/A                    | N/A        | 1              | N/A              | N/A          | N/A       | N/A                | N/A             | N/A               | N/A    | 0          |
| Chatziioannidis 2019  | Schizophrenia                     | N/A              | N/A              | 1                      | N/A                    | N/A        | N/A            | N/A              | N/A          | N/A       | N/A                | N/A             | N/A               | N/A    | N/A        |
| Cutajar 2010          | Schizophrenia                     | N/A              | N/A              | 1                      | N/A                    | N/A        | N/A            | N/A              | N/A          | N/A       | N/A                | N/A             | N/A               | N/A    | N/A        |



| Author                | Health outcome | sex_uncontrolled | regular_symptoms | exp_before_age_above15 | exp_before_age_below15 | women_only | selection_bias | age_uncontrolled | selfreported | type_nonsp | prevalent_diabetes | restricted_perp | reverse_causation | subpop | odds_ratio |
|-----------------------|----------------|------------------|------------------|------------------------|------------------------|------------|----------------|------------------|--------------|------------|--------------------|-----------------|-------------------|--------|------------|
| Mall 2020             | Schizophrenia  | N/A              | N/A              | 1                      | N/A                    | N/A        | N/A            | N/A              | N/A          | N/A        | N/A                | N/A             | N/A               | N/A    | N/A        |
| Mansueti 2022         | Schizophrenia  | N/A              | N/A              | 0                      | N/A                    | N/A        | N/A            | N/A              | N/A          | N/A        | N/A                | N/A             | N/A               | N/A    | N/A        |
| Murphy 2020           | Schizophrenia  | N/A              | N/A              | 0                      | N/A                    | N/A        | N/A            | N/A              | N/A          | N/A        | N/A                | N/A             | N/A               | N/A    | N/A        |
| Banyard 2004          | Self-harm      | N/A              | N/A              | 1                      | N/A                    | 0          | 1              | 1                | N/A          | N/A        | N/A                | N/A             | 0                 | 1      | 1          |
| Bentivegna 2022       | Self-harm      | N/A              | N/A              | 1                      | N/A                    | 0          | 0              | 0                | N/A          | N/A        | N/A                | N/A             | 0                 | 0      | 0          |
| Borges 2021           | Self-harm      | N/A              | N/A              | 1                      | N/A                    | 0          | 1              | 1                | N/A          | N/A        | N/A                | N/A             | 0                 | 0      | 0          |
| Brown 1999            | Self-harm      | N/A              | N/A              | 1                      | N/A                    | 0          | 0              | 0                | N/A          | N/A        | N/A                | N/A             | 0                 | 0      | 1          |
| Chen 2014             | Self-harm      | N/A              | N/A              | 1                      | N/A                    | 1          | 0              | 1                | N/A          | N/A        | N/A                | N/A             | 1                 | 1      | 1          |
| Dinwiddie 2000        | Self-harm      | N/A              | N/A              | 1                      | N/A                    | 1          | 0              | 0                | N/A          | N/A        | N/A                | N/A             | 0                 | 1      | 1          |
| Dube 2005             | Self-harm      | N/A              | N/A              | 1                      | N/A                    | 0          | 0              | 0                | N/A          | N/A        | N/A                | N/A             | 0                 | 1      | 1          |
| Enns 2006             | Self-harm      | N/A              | N/A              | 1                      | N/A                    | 0          | 1              | 0                | N/A          | N/A        | N/A                | N/A             | 0                 | 0      | 1          |
| Guiney 2022           | Self-harm      | N/A              | N/A              | 1                      | N/A                    | 0          | 0              | 1                | N/A          | N/A        | N/A                | N/A             | 0                 | 0      | 0          |
| Kisely and Edres 2022 | Self-harm      | N/A              | N/A              | 0                      | N/A                    | 0          | 1              | 0                | N/A          | N/A        | N/A                | N/A             | 0                 | 0      | 1          |
| Mullen 1996           | Self-harm      | N/A              | N/A              | 1                      | N/A                    | 1          | 1              | 1                | N/A          | N/A        | N/A                | N/A             | 0                 | 1      | 1          |
| Nelson 2002           | Self-harm      | N/A              | N/A              | 1                      | N/A                    | 0          | 0              | 0                | N/A          | N/A        | N/A                | N/A             | 0                 | 1      | 0          |
| Rajapakse 2020        | Self-harm      | N/A              | N/A              | 1                      | N/A                    | 0          | 0              | 0                | N/A          | N/A        | N/A                | N/A             | 1                 | 1      | 1          |
| Roustit 2009          | Self-harm      | N/A              | N/A              | 1                      | N/A                    | 0          | 1              | 0                | N/A          | N/A        | N/A                | N/A             | 0                 | 0      | 1          |
| Thompson 2019         | Self-harm      | N/A              | N/A              | 1                      | N/A                    | 0          | 1              | 0                | N/A          | N/A        | N/A                | N/A             | 0                 | 0      | 1          |
| Xavierhall 2021       | Self-harm      | N/A              | N/A              | 0                      | N/A                    | 0          | 0              | 0                | N/A          | N/A        | N/A                | N/A             | 0                 | 1      | 1          |

| Author            | Health outcome                                | sex_uncontrolled | regular_symptoms | exp_before_age_above15 | exp_before_age_below15 | women_only | selection_bias | age_uncontrolled | selfreported | type_nonsp | prevalent_diabetes | restricted_perp | reverse_causation | subpopulation | odds_ratio |
|-------------------|-----------------------------------------------|------------------|------------------|------------------------|------------------------|------------|----------------|------------------|--------------|------------|--------------------|-----------------|-------------------|---------------|------------|
| Guiney 2022       | Sexually transmitted infections excluding HIV | N/A              | N/A              | 1                      | N/A                    | N/A        | 0              | 1                | N/A          | N/A        | N/A                | 0               | N/A               | N/A           | N/A        |
| Haydon 2011       | Sexually transmitted infections excluding HIV | N/A              | N/A              | 1                      | N/A                    | N/A        | 1              | 0                | N/A          | N/A        | N/A                | 1               | N/A               | N/A           | N/A        |
| Wilson 2009       | Sexually transmitted infections excluding HIV | N/A              | N/A              | 0                      | N/A                    | N/A        | 1              | 1                | N/A          | N/A        | N/A                | 1               | N/A               | N/A           | N/A        |
| Wilson 2009       | Sexually transmitted infections excluding HIV | N/A              | N/A              | 0                      | N/A                    | N/A        | 1              | 1                | N/A          | N/A        | N/A                | 0               | N/A               | N/A           | N/A        |
| Xavierhall 2021   | Sexually transmitted infections excluding HIV | N/A              | N/A              | 0                      | N/A                    | N/A        | 0              | 0                | N/A          | N/A        | N/A                | 0               | N/A               | N/A           | N/A        |
| Duncan 2015       | Type 2 diabetes mellitus                      | N/A              | N/A              | N/A                    | N/A                    | 0          | 0              | 0                | 0            | 1          | 1                  | 1               | N/A               | N/A           | N/A        |
| Kascakova 2022    | Type 2 diabetes mellitus                      | N/A              | N/A              | N/A                    | N/A                    | 0          | 0              | 1                | 1            | 1          | 1                  | 0               | N/A               | N/A           | N/A        |
| Monnat 2015       | Type 2 diabetes mellitus                      | N/A              | N/A              | N/A                    | N/A                    | 0          | 0              | 0                | 1            | 1          | 1                  | 0               | N/A               | N/A           | N/A        |
| Rich-Edwards 2010 | Type 2 diabetes mellitus                      | N/A              | N/A              | N/A                    | N/A                    | 1          | 1              | 0                | 1            | 0          | 0                  | 0               | N/A               | N/A           | N/A        |
| Seid 2022         | Type 2 diabetes mellitus                      | N/A              | N/A              | N/A                    | N/A                    | 1          | 0              | 1                | 1            | 1          | 0                  | 0               | N/A               | N/A           | N/A        |
| Shields 2016      | Type 2 diabetes mellitus                      | N/A              | N/A              | N/A                    | N/A                    | 0          | 0              | 0                | 1            | 1          | 1                  | 0               | N/A               | N/A           | N/A        |
| Thomas 2008       | Type 2 diabetes mellitus                      | N/A              | N/A              | N/A                    | N/A                    | 0          | 1              | 0                | 0            | 0          | 0                  | 1               | N/A               | N/A           | N/A        |

N/A, not available across minimum number of studies needed and not tested for given risk outcome pair. 1 = bias covariate applies to the study; 0 = bias covariate does not apply.

Table S30b: Study bias Characteristics for childhood sexual abuse (continued)

| Author         | Health outcome        | representativeness | confounding_uncontrolled | lifetime_attempts | L1 | admin_exp_method | alternate_outcomedef | component_outcomedef | use | specific_substance | cannabis | component_outcome | symptom_scale | lifetime_diagnosis | aggregate_outcomedef |
|----------------|-----------------------|--------------------|--------------------------|-------------------|----|------------------|----------------------|----------------------|-----|--------------------|----------|-------------------|---------------|--------------------|----------------------|
| Borges 2021    | Alcohol use disorders | 0                  | N/A                      | N/A               | 1  | N/A              | 1                    | N/A                  | N/A | N/A                | N/A      | N/A               | N/A           | N/A                | N/A                  |
| Cutajar 2010   | Alcohol use disorders | 1                  | N/A                      | N/A               | 0  | N/A              | 1                    | N/A                  | N/A | N/A                | N/A      | N/A               | N/A           | N/A                | N/A                  |
| Dinwiddie 2000 | Alcohol use disorders | 0                  | N/A                      | N/A               | 0  | N/A              | 0                    | N/A                  | N/A | N/A                | N/A      | N/A               | N/A           | N/A                | N/A                  |

| Author         | Health outcome        | representativeness | confounding_uncontrolled | lifetime_attempts | L1  | admin_exp_method | alternate_outcomedef | component_outcomedef | use | specific_substance | cannabis | component_outcome | symptom_scale | lifetime_diagnosis | aggregate_outcomedef |
|----------------|-----------------------|--------------------|--------------------------|-------------------|-----|------------------|----------------------|----------------------|-----|--------------------|----------|-------------------|---------------|--------------------|----------------------|
| Fenton 2013    | Alcohol use disorders | 0                  | N/A                      | N/A               | 0   | N/A              | 0                    | N/A                  | N/A | N/A                | N/A      | N/A               | N/A           | N/A                | N/A                  |
| Fergusson 1996 | Alcohol use disorders | 1                  | N/A                      | N/A               | 0   | N/A              | 1                    | N/A                  | N/A | N/A                | N/A      | N/A               | N/A           | N/A                | N/A                  |
| Kendler 2000   | Alcohol use disorders | 1                  | N/A                      | N/A               | 0   | N/A              | 0                    | N/A                  | N/A | N/A                | N/A      | N/A               | N/A           | N/A                | N/A                  |
| Najman 2022    | Alcohol use disorders | 0                  | N/A                      | N/A               | 1   | N/A              | 1                    | N/A                  | N/A | N/A                | N/A      | N/A               | N/A           | N/A                | N/A                  |
| Nelson 2002    | Alcohol use disorders | 1                  | N/A                      | N/A               | 0   | N/A              | 0                    | N/A                  | N/A | N/A                | N/A      | N/A               | N/A           | N/A                | N/A                  |
| Roustit 2009   | Alcohol use disorders | 1                  | N/A                      | N/A               | 0   | N/A              | 0                    | N/A                  | N/A | N/A                | N/A      | N/A               | N/A           | N/A                | N/A                  |
| Sartor 2007    | Alcohol use disorders | 1                  | N/A                      | N/A               | 0   | N/A              | 0                    | N/A                  | N/A | N/A                | N/A      | N/A               | N/A           | N/A                | N/A                  |
| Laporte 2001   | Anorexia nervosa      | N/A                | N/A                      | N/A               | N/A | N/A              | N/A                  | N/A                  | N/A | N/A                | N/A      | N/A               | N/A           | N/A                | N/A                  |
| Paraventi 2011 | Anorexia nervosa      | N/A                | N/A                      | N/A               | N/A | N/A              | N/A                  | N/A                  | N/A | N/A                | N/A      | N/A               | N/A           | N/A                | N/A                  |
| Sanci 2008     | Anorexia nervosa      | N/A                | N/A                      | N/A               | N/A | N/A              | N/A                  | N/A                  | N/A | N/A                | N/A      | N/A               | N/A           | N/A                | N/A                  |
| Talmon 2021    | Anorexia nervosa      | N/A                | N/A                      | N/A               | N/A | N/A              | N/A                  | N/A                  | N/A | N/A                | N/A      | N/A               | N/A           | N/A                | N/A                  |
| Cohen 2001     | Anxiety disorders     | 0                  | N/A                      | N/A               | 1   | N/A              | N/A                  | 0                    | N/A | N/A                | N/A      | N/A               | N/A           | N/A                | N/A                  |
| Copeland 2018  | Anxiety disorders     | 0                  | N/A                      | N/A               | 1   | N/A              | N/A                  | 0                    | N/A | N/A                | N/A      | N/A               | N/A           | N/A                | N/A                  |
| Dinwiddie 2000 | Anxiety disorders     | 0                  | N/A                      | N/A               | 1   | N/A              | N/A                  | 1                    | N/A | N/A                | N/A      | N/A               | N/A           | N/A                | N/A                  |
| Fergusson 2008 | Anxiety disorders     | 0                  | N/A                      | N/A               | 0   | N/A              | N/A                  | 0                    | N/A | N/A                | N/A      | N/A               | N/A           | N/A                | N/A                  |
| Fujiwara 2011  | Anxiety disorders     | 1                  | N/A                      | N/A               | 0   | N/A              | N/A                  | 0                    | N/A | N/A                | N/A      | N/A               | N/A           | N/A                | N/A                  |
| Hovens 2015    | Anxiety disorders     | 1                  | N/A                      | N/A               | 0   | N/A              | N/A                  | 0                    | N/A | N/A                | N/A      | N/A               | N/A           | N/A                | N/A                  |
| Kendler 2000   | Anxiety disorders     | 1                  | N/A                      | N/A               | 0   | N/A              | N/A                  | 1                    | N/A | N/A                | N/A      | N/A               | N/A           | N/A                | N/A                  |
| Kisely 2021    | Anxiety disorders     | 0                  | N/A                      | N/A               | 0   | N/A              | N/A                  | 0                    | N/A | N/A                | N/A      | N/A               | N/A           | N/A                | N/A                  |

| Author         | Health outcome     | representativeness | confounding_uncontrolled | lifetime_attempts | L1  | admin_exp_method | alternate_outcomedef | component_outcomedef | use | specific_substance | cannabis | component_outcome | symptom_scale | lifetime_diagnosis | aggregate_outcomedef |
|----------------|--------------------|--------------------|--------------------------|-------------------|-----|------------------|----------------------|----------------------|-----|--------------------|----------|-------------------|---------------|--------------------|----------------------|
| Raposo 2014    | Anxiety disorders  | 0                  | N/A                      | N/A               | 1   | N/A              | N/A                  | 0                    | N/A | N/A                | N/A      | N/A               | N/A           | N/A                | N/A                  |
| Tenhaven 2019  | Anxiety disorders  | 0                  | N/A                      | N/A               | 1   | N/A              | N/A                  | 0                    | N/A | N/A                | N/A      | N/A               | N/A           | N/A                | N/A                  |
| Widom 1999     | Anxiety disorders  | 1                  | N/A                      | N/A               | 1   | N/A              | N/A                  | 1                    | N/A | N/A                | N/A      | N/A               | N/A           | N/A                | N/A                  |
| Zinzow 2012    | Anxiety disorders  | 1                  | N/A                      | N/A               | 0   | N/A              | N/A                  | 1                    | N/A | N/A                | N/A      | N/A               | N/A           | N/A                | N/A                  |
| Abajobir 2017  | Asthma             | N/A                | N/A                      | N/A               | N/A | N/A              | N/A                  | N/A                  | N/A | N/A                | N/A      | N/A               | N/A           | N/A                | N/A                  |
| Coogan 2013    | Asthma             | N/A                | N/A                      | N/A               | N/A | N/A              | N/A                  | N/A                  | N/A | N/A                | N/A      | N/A               | N/A           | N/A                | N/A                  |
| Han 2022       | Asthma             | N/A                | N/A                      | N/A               | N/A | N/A              | N/A                  | N/A                  | N/A | N/A                | N/A      | N/A               | N/A           | N/A                | N/A                  |
| Kascakova 2022 | Asthma             | N/A                | N/A                      | N/A               | N/A | N/A              | N/A                  | N/A                  | N/A | N/A                | N/A      | N/A               | N/A           | N/A                | N/A                  |
| Andrews 1995   | Bulimia nervosa    | N/A                | 1                        | N/A               | N/A | N/A              | N/A                  | N/A                  | N/A | N/A                | N/A      | 1                 | N/A           | N/A                | N/A                  |
| Kendler 2000   | Bulimia nervosa    | N/A                | 0                        | N/A               | N/A | N/A              | N/A                  | N/A                  | N/A | N/A                | N/A      | 1                 | N/A           | N/A                | N/A                  |
| Paraventi 2011 | Bulimia nervosa    | N/A                | 1                        | N/A               | N/A | N/A              | N/A                  | N/A                  | N/A | N/A                | N/A      | 0                 | N/A           | N/A                | N/A                  |
| Sanci 2008     | Bulimia nervosa    | N/A                | 1                        | N/A               | N/A | N/A              | N/A                  | N/A                  | N/A | N/A                | N/A      | 0                 | N/A           | N/A                | N/A                  |
| Talmon 2021    | Bulimia nervosa    | N/A                | 0                        | N/A               | N/A | N/A              | N/A                  | N/A                  | N/A | N/A                | N/A      | 1                 | N/A           | N/A                | N/A                  |
| Dinwiddie 2000 | Conduct disorder   | N/A                | N/A                      | N/A               | N/A | N/A              | N/A                  | N/A                  | N/A | N/A                | N/A      | N/A               | N/A           | N/A                | N/A                  |
| Fergusson 1996 | Conduct disorder   | N/A                | N/A                      | N/A               | N/A | N/A              | N/A                  | N/A                  | N/A | N/A                | N/A      | N/A               | N/A           | N/A                | N/A                  |
| Nelson 2002    | Conduct disorder   | N/A                | N/A                      | N/A               | N/A | N/A              | N/A                  | N/A                  | N/A | N/A                | N/A      | N/A               | N/A           | N/A                | N/A                  |
| Borges 2021    | Drug use disorders | 0                  | 0                        | N/A               | 1   | N/A              | N/A                  | N/A                  | 0   | 0                  | 0        | N/A               | N/A           | N/A                | N/A                  |
| Cohen 2001     | Drug use disorders | 0                  | 0                        | N/A               | 1   | N/A              | N/A                  | N/A                  | 0   | 0                  | 0        | N/A               | N/A           | N/A                | N/A                  |
| Conroy 2009    | Drug use disorders | 1                  | 0                        | N/A               | 0   | N/A              | N/A                  | N/A                  | 0   | 1                  | 0        | N/A               | N/A           | N/A                | N/A                  |

| Author         | Health outcome     | representativeness | confounding_uncontrolled | lifetime_attempts | L1  | admin_exp_method | alternate_outcomedef | component_outcomedef | use | specific_substance | cannabis | component_outcome | symptom_scale | lifetime_diagnosis | aggregate_outcomedef |
|----------------|--------------------|--------------------|--------------------------|-------------------|-----|------------------|----------------------|----------------------|-----|--------------------|----------|-------------------|---------------|--------------------|----------------------|
| Cutajar 2010   | Drug use disorders | 1                  | 0                        | N/A               | 1   | N/A              | N/A                  | N/A                  | 0   | 0                  | 0        | N/A               | N/A           | N/A                | N/A                  |
| Duncan 2008    | Drug use disorders | 1                  | 0                        | N/A               | 0   | N/A              | N/A                  | N/A                  | 0   | 1                  | 1        | N/A               | N/A           | N/A                | N/A                  |
| Fergusson 1996 | Drug use disorders | 1                  | 0                        | N/A               | 0   | N/A              | N/A                  | N/A                  | 0   | 0                  | 0        | N/A               | N/A           | N/A                | N/A                  |
| Huang 2011     | Drug use disorders | 0                  | 0                        | N/A               | 0   | N/A              | N/A                  | N/A                  | 1   | 0                  | 0        | N/A               | N/A           | N/A                | N/A                  |
| Kalichman 2001 | Drug use disorders | 1                  | 1                        | N/A               | 1   | N/A              | N/A                  | N/A                  | 1   | 0                  | 0        | N/A               | N/A           | N/A                | N/A                  |
| Kaukinen 2005  | Drug use disorders | 1                  | 0                        | N/A               | 0   | N/A              | N/A                  | N/A                  | 1   | 0                  | 0        | N/A               | N/A           | N/A                | N/A                  |
| Kendler 2000   | Drug use disorders | 1                  | 0                        | N/A               | 0   | N/A              | N/A                  | N/A                  | 0   | 0                  | 0        | N/A               | N/A           | N/A                | N/A                  |
| Najman 2022    | Drug use disorders | 0                  | 0                        | N/A               | 1   | N/A              | N/A                  | N/A                  | 0   | 0                  | 0        | N/A               | N/A           | N/A                | N/A                  |
| Nelson 2006    | Drug use disorders | 0                  | 0                        | N/A               | 1   | N/A              | N/A                  | N/A                  | 1   | 1                  | 1        | N/A               | N/A           | N/A                | N/A                  |
| Nelson 2006    | Drug use disorders | 0                  | 0                        | N/A               | 1   | N/A              | N/A                  | N/A                  | 1   | 1                  | 0        | N/A               | N/A           | N/A                | N/A                  |
| Sweet 2013     | Drug use disorders | 0                  | 1                        | N/A               | 1   | N/A              | N/A                  | N/A                  | 0   | 0                  | 0        | N/A               | N/A           | N/A                | N/A                  |
| Sweet 2013     | Drug use disorders | 0                  | 0                        | N/A               | 1   | N/A              | N/A                  | N/A                  | 0   | 0                  | 0        | N/A               | N/A           | N/A                | N/A                  |
| Tanaka 2015    | Drug use disorders | 0                  | 0                        | N/A               | 0   | N/A              | N/A                  | N/A                  | 1   | 0                  | 0        | N/A               | N/A           | N/A                | N/A                  |
| Tonmyr 2017    | Drug use disorders | 1                  | 0                        | N/A               | 0   | N/A              | N/A                  | N/A                  | 1   | 0                  | 0        | N/A               | N/A           | N/A                | N/A                  |
| Zinzow 2012    | Drug use disorders | 1                  | 0                        | N/A               | 0   | N/A              | N/A                  | N/A                  | 0   | 0                  | 0        | N/A               | N/A           | N/A                | N/A                  |
| Deyessa 2018   | HIV/AIDS           | N/A                | N/A                      | N/A               | N/A | N/A              | N/A                  | N/A                  | N/A | N/A                | N/A      | N/A               | N/A           | N/A                | N/A                  |
| Maman 2002     | HIV/AIDS           | N/A                | N/A                      | N/A               | N/A | N/A              | N/A                  | N/A                  | N/A | N/A                | N/A      | N/A               | N/A           | N/A                | N/A                  |
| Mimiaga 2009   | HIV/AIDS           | N/A                | N/A                      | N/A               | N/A | N/A              | N/A                  | N/A                  | N/A | N/A                | N/A      | N/A               | N/A           | N/A                | N/A                  |
| Naicker 2022   | HIV/AIDS           | N/A                | N/A                      | N/A               | N/A | N/A              | N/A                  | N/A                  | N/A | N/A                | N/A      | N/A               | N/A           | N/A                | N/A                  |
| Widom 2012     | HIV/AIDS           | N/A                | N/A                      | N/A               | N/A | N/A              | N/A                  | N/A                  | N/A | N/A                | N/A      | N/A               | N/A           | N/A                | N/A                  |

| Author          | Health outcome            | representativeness | confounding_uncontrolled | lifetime_attempts | L1  | admin_exp_method | alternate_outcomedef | component_outcomedef | use | specific_substance | cannabis | component_outcome | symptom_scale | lifetime_diagnostics | aggregate_outcomedef |
|-----------------|---------------------------|--------------------|--------------------------|-------------------|-----|------------------|----------------------|----------------------|-----|--------------------|----------|-------------------|---------------|----------------------|----------------------|
| Wyatt 2002      | HIV/AIDS                  | N/A                | N/A                      | N/A               | N/A | N/A              | N/A                  | N/A                  | N/A | N/A                | N/A      | N/A               | N/A           | N/A                  | N/A                  |
| Xavierhall 2021 | HIV/AIDS                  | N/A                | N/A                      | N/A               | N/A | N/A              | N/A                  | N/A                  | N/A | N/A                | N/A      | N/A               | N/A           | N/A                  | N/A                  |
| Dong 2004       | Ischemic heart disease    | N/A                | N/A                      | N/A               | N/A | N/A              | N/A                  | N/A                  | N/A | N/A                | N/A      | N/A               | N/A           | N/A                  | N/A                  |
| Kascakova 2022  | Ischemic heart disease    | N/A                | N/A                      | N/A               | N/A | N/A              | N/A                  | N/A                  | N/A | N/A                | N/A      | N/A               | N/A           | N/A                  | N/A                  |
| Monnat 2015     | Ischemic heart disease    | N/A                | N/A                      | N/A               | N/A | N/A              | N/A                  | N/A                  | N/A | N/A                | N/A      | N/A               | N/A           | N/A                  | N/A                  |
| Andrews 1995    | Major depressive disorder | 1                  | 1                        | N/A               | 1   | N/A              | N/A                  | N/A                  | N/A | N/A                | N/A      | N/A               | 0             | 0                    | 1                    |
| Bifulco 1991    | Major depressive disorder | 1                  | 1                        | N/A               | 1   | N/A              | N/A                  | N/A                  | N/A | N/A                | N/A      | N/A               | 0             | 0                    | 1                    |
| Chapman 2004    | Major depressive disorder | 1                  | 0                        | N/A               | 1   | N/A              | N/A                  | N/A                  | N/A | N/A                | N/A      | N/A               | 1             | 0                    | 1                    |
| Cheasty 1998    | Major depressive disorder | 1                  | 1                        | N/A               | 1   | N/A              | N/A                  | N/A                  | N/A | N/A                | N/A      | N/A               | 1             | 0                    | 0                    |
| Cohen 2001      | Major depressive disorder | 0                  | 0                        | N/A               | 1   | N/A              | N/A                  | N/A                  | N/A | N/A                | N/A      | N/A               | 0             | 0                    | 1                    |
| Comijs 2013     | Major depressive disorder | 1                  | 0                        | N/A               | 1   | N/A              | N/A                  | N/A                  | N/A | N/A                | N/A      | N/A               | 0             | 0                    | 1                    |
| Copeland 2018   | Major depressive disorder | 0                  | 0                        | N/A               | 1   | N/A              | N/A                  | N/A                  | N/A | N/A                | N/A      | N/A               | 0             | 0                    | 1                    |
| Dinwiddie 2000  | Major depressive disorder | 0                  | 0                        | N/A               | 1   | N/A              | N/A                  | N/A                  | N/A | N/A                | N/A      | N/A               | 0             | 1                    | 0                    |
| Dube 2005       | Major depressive disorder | 1                  | 0                        | N/A               | 0   | N/A              | N/A                  | N/A                  | N/A | N/A                | N/A      | N/A               | 0             | 0                    | 1                    |
| Ebert 2019      | Major depressive disorder | 1                  | 0                        | N/A               | 1   | N/A              | N/A                  | N/A                  | N/A | N/A                | N/A      | N/A               | 0             | 0                    | 0                    |
| Fergusson 2008  | Major depressive disorder | 0                  | 0                        | N/A               | 0   | N/A              | N/A                  | N/A                  | N/A | N/A                | N/A      | N/A               | 0             | 0                    | 0                    |

| Author         | Health outcome                    | representativeness | confounding_uncontrolled | lifetime_attempts | L1 | admin_exp_method | alternate_outcomedef | component_outcomedef | use | specific_substance | cannabis | component_outcome | symptom_scale | lifetime_diagnosis | aggregate_outcomedef |
|----------------|-----------------------------------|--------------------|--------------------------|-------------------|----|------------------|----------------------|----------------------|-----|--------------------|----------|-------------------|---------------|--------------------|----------------------|
| Galloeag 2017  | Major depressive disorder         | 0                  | 0                        | N/A               | 0  | N/A              | N/A                  | N/A                  | N/A | N/A                | N/A      | N/A               | 0             | 0                  | 0                    |
| Houtepe n 2020 | Major depressive disorder         | 0                  | 0                        | N/A               | 0  | N/A              | N/A                  | N/A                  | N/A | N/A                | N/A      | N/A               | 0             | 0                  | 1                    |
| Hovens 2015    | Major depressive disorder         | 1                  | 0                        | N/A               | 0  | N/A              | N/A                  | N/A                  | N/A | N/A                | N/A      | N/A               | 0             | 0                  | 1                    |
| Jaffee 2002    | Major depressive disorder         | 1                  | 0                        | N/A               | 1  | N/A              | N/A                  | N/A                  | N/A | N/A                | N/A      | N/A               | 0             | 0                  | 0                    |
| Kendler 2000   | Major depressive disorder         | 1                  | 0                        | N/A               | 0  | N/A              | N/A                  | N/A                  | N/A | N/A                | N/A      | N/A               | 0             | 0                  | 0                    |
| Kisely 2021    | Major depressive disorder         | 0                  | 0                        | N/A               | 0  | N/A              | N/A                  | N/A                  | N/A | N/A                | N/A      | N/A               | 0             | 0                  | 1                    |
| Mullen 1996    | Major depressive disorder         | 1                  | 1                        | N/A               | 1  | N/A              | N/A                  | N/A                  | N/A | N/A                | N/A      | N/A               | 0             | 1                  | 1                    |
| Nelson 2002    | Major depressive disorder         | 1                  | 0                        | N/A               | 1  | N/A              | N/A                  | N/A                  | N/A | N/A                | N/A      | N/A               | 0             | 0                  | 0                    |
| Ratner 2003    | Major depressive disorder         | 1                  | 1                        | N/A               | 1  | N/A              | N/A                  | N/A                  | N/A | N/A                | N/A      | N/A               | 0             | 0                  | 1                    |
| Roustit 2009   | Major depressive disorder         | 1                  | 0                        | N/A               | 0  | N/A              | N/A                  | N/A                  | N/A | N/A                | N/A      | N/A               | 0             | 0                  | 1                    |
| Su 2022        | Major depressive disorder         | 1                  | 0                        | N/A               | 1  | N/A              | N/A                  | N/A                  | N/A | N/A                | N/A      | N/A               | 0             | 0                  | 0                    |
| Widom 2007     | Major depressive disorder         | 1                  | 0                        | N/A               | 1  | N/A              | N/A                  | N/A                  | N/A | N/A                | N/A      | N/A               | 0             | 0                  | 0                    |
| Wise 2001      | Major depressive disorder         | 0                  | 0                        | N/A               | 0  | N/A              | N/A                  | N/A                  | N/A | N/A                | N/A      | N/A               | 0             | 0                  | 1                    |
| Xiao 2022      | Major depressive disorder         | 0                  | 1                        | N/A               | 1  | N/A              | N/A                  | N/A                  | N/A | N/A                | N/A      | N/A               | 0             | 0                  | 1                    |
| Zinzow 2012    | Major depressive disorder         | 1                  | 0                        | N/A               | 0  | N/A              | N/A                  | N/A                  | N/A | N/A                | N/A      | N/A               | 0             | 0                  | 0                    |
| Abajobir 2018  | Maternal abortion and miscarriage | N/A                | N/A                      | N/A               | 0  | 1                | N/A                  | N/A                  | N/A | N/A                | N/A      | N/A               | N/A           | N/A                | N/A                  |



| Author                | Health outcome                    | representativeness | confounding_uncontrolled | lifetime_attempts | L1 | admin_exp_method | alternate_outcomedef | component_outcomedef | use | specific_substance | cannabis | component_outcome | symptom_scale | lifetime_diagnosis | aggregate_outcomedef |
|-----------------------|-----------------------------------|--------------------|--------------------------|-------------------|----|------------------|----------------------|----------------------|-----|--------------------|----------|-------------------|---------------|--------------------|----------------------|
| Demakos 2020          | Maternal abortion and miscarriage | N/A                | N/A                      | N/A               | 0  | 0                | N/A                  | N/A                  | N/A | N/A                | N/A      | N/A               | N/A           | N/A                | N/A                  |
| Fortin-Langelier 2019 | Maternal abortion and miscarriage | N/A                | N/A                      | N/A               | 1  | 1                | N/A                  | N/A                  | N/A | N/A                | N/A      | N/A               | N/A           | N/A                | N/A                  |
| Kerkar 2021           | Maternal abortion and miscarriage | N/A                | N/A                      | N/A               | 0  | 0                | N/A                  | N/A                  | N/A | N/A                | N/A      | N/A               | N/A           | N/A                | N/A                  |
| Taft 2019             | Maternal abortion and miscarriage | N/A                | N/A                      | N/A               | 0  | 0                | N/A                  | N/A                  | N/A | N/A                | N/A      | N/A               | N/A           | N/A                | N/A                  |
| Vanroode 2009         | Maternal abortion and miscarriage | N/A                | N/A                      | N/A               | 1  | 0                | N/A                  | N/A                  | N/A | N/A                | N/A      | N/A               | N/A           | N/A                | N/A                  |
| Chatziioannidis 2019  | Schizophrenia                     | N/A                | 1                        | N/A               | 1  | N/A              | N/A                  | N/A                  | N/A | N/A                | N/A      | N/A               | N/A           | N/A                | N/A                  |
| Cutajar 2010          | Schizophrenia                     | N/A                | 0                        | N/A               | 1  | N/A              | N/A                  | N/A                  | N/A | N/A                | N/A      | N/A               | N/A           | N/A                | N/A                  |
| Mall 2020             | Schizophrenia                     | N/A                | 0                        | N/A               | 0  | N/A              | N/A                  | N/A                  | N/A | N/A                | N/A      | N/A               | N/A           | N/A                | N/A                  |
| Mansueti 2022         | Schizophrenia                     | N/A                | 0                        | N/A               | 0  | N/A              | N/A                  | N/A                  | N/A | N/A                | N/A      | N/A               | N/A           | N/A                | N/A                  |
| Murphy 2020           | Schizophrenia                     | N/A                | 1                        | N/A               | 1  | N/A              | N/A                  | N/A                  | N/A | N/A                | N/A      | N/A               | N/A           | N/A                | N/A                  |
| Banyard 2004          | Self-harm                         | 1                  | 0                        | 1                 | 1  | N/A              | N/A                  | N/A                  | N/A | N/A                | N/A      | N/A               | N/A           | N/A                | N/A                  |
| Bentivegna 2022       | Self-harm                         | 0                  | 0                        | 0                 | 0  | N/A              | N/A                  | N/A                  | N/A | N/A                | N/A      | N/A               | N/A           | N/A                | N/A                  |
| Borges 2021           | Self-harm                         | 0                  | 0                        | 0                 | 1  | N/A              | N/A                  | N/A                  | N/A | N/A                | N/A      | N/A               | N/A           | N/A                | N/A                  |
| Brown 1999            | Self-harm                         | 1                  | 0                        | 0                 | 0  | N/A              | N/A                  | N/A                  | N/A | N/A                | N/A      | N/A               | N/A           | N/A                | N/A                  |
| Chen 2014             | Self-harm                         | 1                  | 1                        | 0                 | 1  | N/A              | N/A                  | N/A                  | N/A | N/A                | N/A      | N/A               | N/A           | N/A                | N/A                  |
| Dinwiddie 2000        | Self-harm                         | 0                  | 0                        | 1                 | 1  | N/A              | N/A                  | N/A                  | N/A | N/A                | N/A      | N/A               | N/A           | N/A                | N/A                  |
| Dube 2005             | Self-harm                         | 1                  | 0                        | 1                 | 0  | N/A              | N/A                  | N/A                  | N/A | N/A                | N/A      | N/A               | N/A           | N/A                | N/A                  |
| Enns 2006             | Self-harm                         | 0                  | 0                        | 0                 | 0  | N/A              | N/A                  | N/A                  | N/A | N/A                | N/A      | N/A               | N/A           | N/A                | N/A                  |
| Guiney 2022           | Self-harm                         | 0                  | 0                        | 0                 | 1  | N/A              | N/A                  | N/A                  | N/A | N/A                | N/A      | N/A               | N/A           | N/A                | N/A                  |

| Author             | Health outcome                                | representativeness | confounding_uncontrolled | lifetime_attempts | L1  | admin_exp_method | alternate_outcomedef | component_outcomedef | use | specific_substance | cannabis | component_outcome | symptom_scale | lifetime_diagnosis | aggregate_outcomedef |
|--------------------|-----------------------------------------------|--------------------|--------------------------|-------------------|-----|------------------|----------------------|----------------------|-----|--------------------|----------|-------------------|---------------|--------------------|----------------------|
| Kiselydredres 2022 | Self-harm                                     | 1                  | 1                        | 0                 | 1   | N/A              | N/A                  | N/A                  | N/A | N/A                | N/A      | N/A               | N/A           | N/A                | N/A                  |
| Mullen 1996        | Self-harm                                     | 1                  | 1                        | 0                 | 1   | N/A              | N/A                  | N/A                  | N/A | N/A                | N/A      | N/A               | N/A           | N/A                | N/A                  |
| Nelson 2002        | Self-harm                                     | 1                  | 0                        | 1                 | 1   | N/A              | N/A                  | N/A                  | N/A | N/A                | N/A      | N/A               | N/A           | N/A                | N/A                  |
| Rajapakse 2020     | Self-harm                                     | 1                  | 0                        | 0                 | 1   | N/A              | N/A                  | N/A                  | N/A | N/A                | N/A      | N/A               | N/A           | N/A                | N/A                  |
| Roustit 2009       | Self-harm                                     | 1                  | 0                        | 0                 | 0   | N/A              | N/A                  | N/A                  | N/A | N/A                | N/A      | N/A               | N/A           | N/A                | N/A                  |
| Thompson 2019      | Self-harm                                     | 0                  | 0                        | 0                 | 0   | N/A              | N/A                  | N/A                  | N/A | N/A                | N/A      | N/A               | N/A           | N/A                | N/A                  |
| Xavierhall 2021    | Self-harm                                     | 1                  | 0                        | 0                 | 0   | N/A              | N/A                  | N/A                  | N/A | N/A                | N/A      | N/A               | N/A           | N/A                | N/A                  |
| Guiney 2022        | Sexually transmitted infections excluding HIV | 0                  | N/A                      | N/A               | N/A | N/A              | N/A                  | N/A                  | N/A | N/A                | N/A      | N/A               | N/A           | N/A                | N/A                  |
| Haydon 2011        | Sexually transmitted infections excluding HIV | 0                  | N/A                      | N/A               | N/A | N/A              | N/A                  | N/A                  | N/A | N/A                | N/A      | N/A               | N/A           | N/A                | N/A                  |
| Wilson 2009        | Sexually transmitted infections excluding HIV | 1                  | N/A                      | N/A               | N/A | N/A              | N/A                  | N/A                  | N/A | N/A                | N/A      | N/A               | N/A           | N/A                | N/A                  |
| Wilson 2009        | Sexually transmitted infections excluding HIV | 1                  | N/A                      | N/A               | N/A | N/A              | N/A                  | N/A                  | N/A | N/A                | N/A      | N/A               | N/A           | N/A                | N/A                  |
| Xavierhall 2021    | Sexually transmitted infections excluding HIV | 1                  | N/A                      | N/A               | N/A | N/A              | N/A                  | N/A                  | N/A | N/A                | N/A      | N/A               | N/A           | N/A                | N/A                  |
| Duncan 2015        | Type 2 diabetes mellitus                      | N/A                | N/A                      | N/A               | N/A | N/A              | N/A                  | N/A                  | N/A | N/A                | N/A      | N/A               | N/A           | N/A                | N/A                  |
| Kascakova 2022     | Type 2 diabetes mellitus                      | N/A                | N/A                      | N/A               | N/A | N/A              | N/A                  | N/A                  | N/A | N/A                | N/A      | N/A               | N/A           | N/A                | N/A                  |

| Author            | Health outcome           | representativeness | confounding_uncontrolled | lifetime_attempts | L1  | admin_exp_method | alternate_outcomedef | component_outcomedef | use | specific_substance | cannabis | component_outcome | symptom_scale | lifetime_diagnosis | aggregate_outcomedef |
|-------------------|--------------------------|--------------------|--------------------------|-------------------|-----|------------------|----------------------|----------------------|-----|--------------------|----------|-------------------|---------------|--------------------|----------------------|
| Monnat 2015       | Type 2 diabetes mellitus | N/A                | N/A                      | N/A               | N/A | N/A              | N/A                  | N/A                  | N/A | N/A                | N/A      | N/A               | N/A           | N/A                | N/A                  |
| Rich-Edwards 2010 | Type 2 diabetes mellitus | N/A                | N/A                      | N/A               | N/A | N/A              | N/A                  | N/A                  | N/A | N/A                | N/A      | N/A               | N/A           | N/A                | N/A                  |
| Seid 2022         | Type 2 diabetes mellitus | N/A                | N/A                      | N/A               | N/A | N/A              | N/A                  | N/A                  | N/A | N/A                | N/A      | N/A               | N/A           | N/A                | N/A                  |
| Shields 2016      | Type 2 diabetes mellitus | N/A                | N/A                      | N/A               | N/A | N/A              | N/A                  | N/A                  | N/A | N/A                | N/A      | N/A               | N/A           | N/A                | N/A                  |
| Thomas 2008       | Type 2 diabetes mellitus | N/A                | N/A                      | N/A               | N/A | N/A              | N/A                  | N/A                  | N/A | N/A                | N/A      | N/A               | N/A           | N/A                | N/A                  |

N/A, not available across minimum number of studies needed and not tested for given risk outcome pair. 1 = bias covariate applies to the study; 0 = bias covariate does not apply.

## Section 7: Calculating the ROS and measure of excess risk

Following the methods outlined by Zheng and colleagues, the burden of proof risk function is defined as the 5<sup>th</sup> quantile closest to the RR equal to one, interpretable as the smallest harmful effect of the risk factor consistent with available evidence. The BPRF is calculated by combining uncertainty of the mean, estimated between-study heterogeneity ( $\gamma$ ), and the 95<sup>th</sup> quantile of  $\gamma$  obtained from the fisher information matrix. The risk-outcome score (ROS) summarizes the effect of the risk factor on the health outcome under study and is calculated as the absolute value of the log BRPF divided by two:

$$ROS = \frac{|\log(BPRF)|}{2}$$

ROS are categorized into star ratings according to the following thresholds: ROS (one-star,  $\leq 0.0$  ROS; two-star,  $> 0.0-0.14$  ROS; three-star,  $> 0.14-0.41$  ROS; four-star,  $> 0.41-0.62$  ROS; five-star,  $> 0.62$  ROS).

From the log BPRF, we can also calculate a measure of excess risk:

$$\textit{Minimum percent increase in risk} = (BPRF - 1) * 100\%$$
